# Supplementary material for: Learning to fly: thermochemistry of energetic materials by modified thermogravimetric analysis and highly accurate quantum chemical calculations
Source: Royal Society of Chemistry journal article supplement (doi:10.1039/d1cp02201f), 2021-01-01
Supplement: d1cp02201f1.pdf [file d1cp02201f1.pdf]

**Supporting information**

---

Learning to Fly: Thermochemistry of Energetic Materials by Modified  
Thermogravimetric Analysis and Highly Accurate Quantum Chemical  
Calculations

*Nikita V. Muravyev,<sup>a\*</sup> Konstantin A. Monogarov,<sup>a</sup> Igor N. Melnikov,<sup>a</sup> Alla N. Pivkina,<sup>a</sup> Vitaly G. Kiselev<sup>a,b,c</sup>*

<sup>a</sup> Semenov Federal Research Center for Chemical Physics RAS, 4 Kosygina Str., 119991 Moscow, Russia

<sup>b</sup> Novosibirsk State University, 1 Pirogova Str., 630090 Novosibirsk, Russia

<sup>c</sup> Institute of Chemical Kinetics and Combustion SB RAS, 3 Institutskaya Str., 630090 Novosibirsk, Russia

---

## Contents

|                                                                                                                                                                                                                                                                       |     |
|-----------------------------------------------------------------------------------------------------------------------------------------------------------------------------------------------------------------------------------------------------------------------|-----|
| S1. Characterization of the compounds studied .....                                                                                                                                                                                                                   | S3  |
| S2. Thermal corrections of the phase change data .....                                                                                                                                                                                                                | S8  |
| S4. Summary of the data fit with the modified Westwell-Trouton equation .....                                                                                                                                                                                         | S19 |
| S5. Quantum chemical calculations of the gas-phase enthalpies of formation: Summary and literature data. Raw quantum chemical data: optimized geometries, electronic energies, and thermal corrections to thermodynamic potentials of all compounds under study ..... | S20 |
| References .....                                                                                                                                                                                                                                                      | S84 |

## S1. Characterization of the compounds studied

Table S1 lists the compounds studied. They include the non-energetic species taken as references for thermochemical parameters (entries ##1-11), and the species with typical explosophoric functional groups or structural units, i.e., nitroaromatics (##12-16), aliphatic nitrocompounds (##17, 18), fluorine containing species (#19), nitramines (##20-26), caged nitramines (##27, 28), nitroesters (##29-31), diaziridine (#32), imidazoles (##33-34), pyrazoles (##35-42), pyrazines (##43, 44), triazoles (##45, 46), tetrazoles (##49-50), azasydnones (##51, 52), furazans (##53-57), furoxans (##58-63). All these compounds are comprised of CHNO atoms, except #19, which extends the proposed methodology to CHNOF compounds. Moreover, to cope with some typical difficulties in a common calorimetric experiment, we consider the two species (##47, 49) containing the water molecules in the crystal and #19, which is liquid at room temperature.

Due to the difficulties in determining of the accurate purity values for the materials with common physico-chemical tools, it was measured only for selected compounds (via DSC or NMR with the internal standard). For the rest of materials (denoted as “P” in the corresponding column) the NMR, MS spectra and the elemental analysis results were used for characterization. If the complete characterization of the species was published, the literature reference is given.

**Table S1.** List of investigated compounds with their purity and phase transition parameters.

| # | Compound                      | Formula                                | Abbreviation | Purity / mol. %   | $T_m / ^\circ\text{C}$      |                               | $\Delta H_m(T_m) / \text{kJ mol}^{-1}$ |                               |
|---|-------------------------------|----------------------------------------|--------------|-------------------|-----------------------------|-------------------------------|----------------------------------------|-------------------------------|
|   |                               |                                        |              |                   | exp.                        | ref.                          | exp.                                   | ref.                          |
| 1 | Acetamide                     | $\text{C}_2\text{H}_5\text{NO}$        | <b>ACM</b>   | 99.8 <sup>a</sup> | $80.5 \pm 0.2^{\text{d,f}}$ | 80.3[1]<br>81.8[2]            | $16.2 \pm 0.8^{\text{d,e}}$            | 15.6[1,3]                     |
| 2 | Carbamide                     | $\text{CH}_4\text{N}_2\text{O}$        | <b>Urea</b>  | P                 | 133                         | 132.9[4]                      | – <sup>c</sup>                         | –                             |
| 3 | 2-Amino-3-methylbutanoic acid | $\text{C}_5\text{H}_{11}\text{NO}_2$   | <b>Val</b>   | P                 | 294 <sup>d</sup>            | 298[5]                        | – <sup>c</sup>                         | –                             |
| 4 | Benzoic acid                  | $\text{C}_7\text{H}_6\text{O}_2$       | <b>BCA</b>   | 99.9 <sup>a</sup> | $122.1 \pm 0.4$             | $122.1 \pm 0.7[4]$            | $18.1 \pm 0.6^{\text{d}}$              | 17.3[6]<br>16.2[7]<br>18.0[8] |
| 5 | Naphtalene                    | $\text{C}_{10}\text{H}_8$              | <b>NPH</b>   | 99.9 <sup>a</sup> | $80.4 \pm 0.3^{\text{f}}$   | $80.1 \pm 0.7[4]$             | $20.2 \pm 0.4^{\text{d,e}}$            | 19.6[9]<br>19.3[10]           |
| 6 | Adamantane                    | $\text{C}_{10}\text{H}_{16}$           | <b>ADM</b>   | P                 | 267 <sup>d</sup>            | 269[11]<br>270[12]<br>279[13] | –                                      | 14.0[12]<br>10.9[14]          |
| 7 | Anthracene                    | $\text{C}_{14}\text{H}_{10}$           | <b>ANT</b>   | 99.9 <sup>a</sup> | $216.3 \pm 0.1^{\text{d}}$  | $217 \pm 3[4]$                | $29.3 \pm 0.9^{\text{d,e}}$            | 28.8[15]<br>29.8[16]          |
| 8 | Trans-azobenzene              | $\text{C}_{12}\text{H}_{10}\text{N}_2$ | <b>tAB</b>   | 99.9 <sup>a</sup> | $67.8 \pm 0.5^{\text{d}}$   | 66.8[17]                      | $27.6 \pm 0.3^{\text{d}}$              | 20.8[17]                      |

|    |                                                                                  |                                                                             |               |                   |                            |                                                       |                                 |                                                    |
|----|----------------------------------------------------------------------------------|-----------------------------------------------------------------------------|---------------|-------------------|----------------------------|-------------------------------------------------------|---------------------------------|----------------------------------------------------|
|    |                                                                                  |                                                                             |               |                   |                            | 67.9[18]                                              |                                 | 21.3[19]<br>22.6[20]                               |
| 9  | Hypoxanthine                                                                     | C <sub>5</sub> H <sub>4</sub> N <sub>4</sub> O                              | <b>HPX</b>    | P                 | 405 <sup>d</sup>           | –                                                     | – <sup>c</sup>                  | –                                                  |
| 10 | 1,3-Dimethylxanthine                                                             | C <sub>7</sub> H <sub>8</sub> N <sub>4</sub> O <sub>2</sub>                 | <b>TPL</b>    | 99.9 <sup>a</sup> | 271.1 ± 0.3                | 269.1 for form II, 273.4 for form I [21]<br>270.6[22] | 25.2 ± 1.8                      | 28.2 for form II, 26.4 for form I [21]<br>31.2[22] |
| 11 | 6,7,9,10,17,18,20,21-Octahydrodibenzo[b,k][1,4,7,10,13,16]hexaoxacyclooctadecine | C <sub>20</sub> H <sub>24</sub> O <sub>6</sub>                              | <b>D18C6</b>  | 99.9 <sup>a</sup> | 162.1 ± 0.1                | 162.6[23]<br>166.9[24]                                | 57.1 ± 1.5                      | 55.4[24]<br>60.7[25]<br>56[23]                     |
| 12 | 1-Azido-4-nitrobenzene                                                           | C <sub>6</sub> H <sub>4</sub> N <sub>4</sub> O <sub>2</sub>                 | <b>4-NPA</b>  | 99.9 <sup>a</sup> | 69.7 ± 0.4                 | 72[26]<br>73.9[27]                                    | 25.1 ± 1.3                      | 17.1 [26]                                          |
| 13 | 1-Methyl-2,4-dinitrobenzene                                                      | C <sub>7</sub> H <sub>6</sub> N <sub>2</sub> O <sub>4</sub>                 | <b>24-DNT</b> | 99.9 <sup>a</sup> | 69.4 ± 0.3                 | 67.9[28]<br>71.2[29]                                  | 25.3 ± 0.7                      | 20.1[30]<br>20.9[10]                               |
| 14 | 2,4-Dinitroanisole                                                               | C <sub>7</sub> H <sub>6</sub> N <sub>2</sub> O <sub>5</sub>                 | <b>DNAN</b>   | 99.9 <sup>a</sup> | 86.2 ± 0.6                 | 87.5 for β-,<br>96.7 for α-[31]<br>86.8[32]           | 21.1 ± 0.8                      | 20.2 [33]                                          |
| 15 | 2,4,6-Trinitrotoluene                                                            | C <sub>7</sub> H <sub>5</sub> N <sub>3</sub> O <sub>6</sub>                 | <b>TNT</b>    | 99.8 <sup>b</sup> | 80.4 ± 0.3[34]             | 80.7[35]                                              | 22.5 ± 0.5[34]                  | 23.4[36]                                           |
| 16 | N-Methyl-N-(2,4,6-trinitrophenyl)nitramide                                       | C <sub>7</sub> H <sub>5</sub> N <sub>5</sub> O <sub>8</sub>                 | <b>Tetryl</b> | 99.9 <sup>a</sup> | 129.0 ± 0.6                | 128.7-<br>129.1[37] 127.4[38]<br>129.5[39]            | 25.3 ± 1.5                      | 22.9[39]<br>25.9[38]                               |
| 17 | 2,2-Dinitroethene-1,1-diamine                                                    | C <sub>2</sub> H <sub>4</sub> N <sub>4</sub> O <sub>4</sub>                 | <b>FOX-7</b>  | P                 | – <sup>g</sup>             | –                                                     | – <sup>g</sup>                  | –                                                  |
| 18 | Tetranitroacetimidic acid                                                        | C <sub>2</sub> HN <sub>5</sub> O <sub>9</sub>                               | <b>TNAA</b>   | 99.5 <sup>b</sup> | 91.0 ± 0.2[40]             | 91[41]                                                | 14.9 ± 1.8 <sup>c</sup><br>[40] | –                                                  |
| 19 | Bis(2-fluoro-2,2-dinitroethyl)formal                                             | C <sub>5</sub> H <sub>6</sub> N <sub>4</sub> O <sub>10</sub> F <sub>2</sub> | <b>FEFO</b>   | P                 | –                          | 13.4[42]<br>14.5[43]                                  | –                               | –                                                  |
| 20 | Nitroguanidine                                                                   | CH <sub>4</sub> N <sub>4</sub> O <sub>2</sub>                               | <b>NIGU</b>   | P                 | –                          | –                                                     | –                               | –                                                  |
| 21 | 2,4-Dinitro-2,4-diazapentane                                                     | C <sub>3</sub> H <sub>8</sub> N <sub>4</sub> O <sub>4</sub>                 | <b>DNDAP</b>  | 99.8 <sup>a</sup> | 54.8 ± 0.4 <sup>f</sup>    | 54[44]<br>54.4[45]                                    | 22.3 ± 1.1                      | 16.4[46]                                           |
| 22 | 1,4-Dinitropiperazine                                                            | C <sub>4</sub> H <sub>8</sub> N <sub>4</sub> O <sub>4</sub>                 | <b>DNPP</b>   | 99.9 <sup>a</sup> | 216.2 ± 0.3 <sup>d,f</sup> | 214[46]<br>215[47]                                    | 35.2 ± 1.1 <sup>d</sup>         | 33.8[46]                                           |

|    |                                                                                |                                                               |               |                   |                                  |                                   |                              |                          |
|----|--------------------------------------------------------------------------------|---------------------------------------------------------------|---------------|-------------------|----------------------------------|-----------------------------------|------------------------------|--------------------------|
| 23 | 1,3,5-Trinitroperhydro-1,3,5-triazine                                          | C <sub>3</sub> H <sub>6</sub> N <sub>6</sub> O <sub>6</sub>   | <b>RDX</b>    | P                 | 204.2 ± 0.3 <sup>c</sup><br>[34] | 204.0±0.1[39]                     | 27.5 ± 0.9 <sup>c</sup> [34] | 33.9±1.0[48]             |
| 24 | Octahydro-1,3,5,7-tetranitro-1,3,5,7-tetrazocine                               | C <sub>4</sub> H <sub>8</sub> N <sub>8</sub> O <sub>8</sub>   | <b>HMX</b>    | P                 | 280 <sup>c</sup>                 | 280.8±1.1[48]                     | – <sup>c,g</sup>             | 31.9±3.9[48]             |
| 25 | 1,9-diazido-2,4,6,8-tetranitro-2,4,6,8-tetrazanonane                           | C <sub>5</sub> H <sub>10</sub> N <sub>14</sub> O <sub>8</sub> | <b>DATN</b>   | P                 | 177.4 ± 0.5 <sup>c</sup>         | 176-177[49]<br>177[50]            | – <sup>c</sup>               | –                        |
| 26 | cis-2,4,6,8-Tetra-nitro-1H,5H-2,4,6,8-tetraazabicyclo-[3.3.0]-octane           | C <sub>4</sub> H <sub>6</sub> N <sub>8</sub> O <sub>8</sub>   | <b>BC-HMX</b> | P                 | –                                | –                                 | –                            | –                        |
| 27 | 4,10-Dinitro-2,6,8,12-tetraoxa-4,10-diazatetracyclo[5.5.0.05,9.03,11]-dodecane | C <sub>6</sub> H <sub>6</sub> N <sub>4</sub> O <sub>8</sub>   | <b>TEX</b>    | 99.0 <sup>b</sup> | –                                | –                                 | –                            | –                        |
| 28 | 2,4,6,8,10,12-Hexanitro-2,4,6,8,10,12-hexaazaisowurtzitane                     | C <sub>6</sub> H <sub>6</sub> N <sub>12</sub> O <sub>12</sub> | <b>CL-20</b>  | P                 | –                                | –                                 | – <sup>g</sup>               | –                        |
| 29 | Erythritol tetranitrate                                                        | C <sub>4</sub> H <sub>6</sub> N <sub>4</sub> O <sub>12</sub>  | <b>ETN</b>    | 99.6 <sup>a</sup> | 61.2 ± 0.7                       | 60±2[51]                          | 36.9 ± 3.3 <sup>d</sup>      | 32±3[51]                 |
| 30 | Pentaerythritol tetranitrate                                                   | C <sub>5</sub> H <sub>8</sub> N <sub>4</sub> O <sub>12</sub>  | <b>PETN</b>   | 99.9 <sup>a</sup> | 140.9±0.3                        | 141.0±0.2[48]<br>142±2[51]        | 48.1±1.1                     | 40±7[51]<br>53.8±3.9[48] |
| 31 | 2,3-Hydroxymethyl-2,3-dinitro-1,4-butanediol tetranitrate                      | C <sub>6</sub> H <sub>8</sub> N <sub>6</sub> O <sub>16</sub>  | <b>SMX</b>    | 99.4 <sup>a</sup> | 86.6 ± 0.7                       | 85-86[52]                         | 43.7 ± 3.0                   | 35±6[51]                 |
| 32 | 3,3-Pentamethylenediaziridine                                                  | C <sub>6</sub> H <sub>12</sub> N <sub>2</sub>                 | <b>PMDA</b>   | P                 | 105 <sup>d,f</sup>               | –                                 | 28 <sup>d</sup>              | –                        |
| 33 | 2,4-Dinitroimidazole                                                           | C <sub>3</sub> H <sub>2</sub> N <sub>4</sub> O <sub>4</sub>   | <b>24-DNI</b> | P                 | –                                | 278-<br>280[53] 265-<br>274[54]   | –                            | –                        |
| 34 | 4,5-Dinitroimidazole                                                           | C <sub>3</sub> H <sub>2</sub> N <sub>4</sub> O <sub>4</sub>   | <b>45-DNI</b> | P                 | 179.9 ± 1.0 <sup>f</sup>         | 187-188[55]                       | 23.3 ± 1.6                   | –                        |
| 35 | 3,4-Dinitro-1H-pyrazole                                                        | C <sub>3</sub> H <sub>2</sub> N <sub>4</sub> O <sub>4</sub>   | <b>34-DNP</b> | 99.5 <sup>a</sup> | 85.9 ± 0.8 <sup>f</sup>          | 87[56] 89[57]                     | 14.2 ± 0.3                   | –                        |
| 36 | 3,5-Dinitro-1H-pyrazole                                                        | C <sub>3</sub> H <sub>2</sub> N <sub>4</sub> O <sub>4</sub>   | <b>35-DNP</b> | P                 | 169.2 ± 0.3<br>[58]              | 168[56]<br>172[59]                | 20.7 ± 0.8                   | –                        |
| 37 | 3,5-Dinitropyrazole-1-amine                                                    | C <sub>3</sub> H <sub>3</sub> N <sub>5</sub> O <sub>4</sub>   | <b>1-ADP</b>  | 99.7 <sup>a</sup> | 112.9 ± 0.7 <sup>f</sup>         | 112[60]<br>113[61]                | 23.6 ± 2.2                   | –                        |
| 38 | 5-Amino-3,4-dinitro-1H-pyrazole                                                | C <sub>3</sub> H <sub>3</sub> N <sub>5</sub> O <sub>4</sub>   | <b>5-ADP</b>  | 99.5 <sup>b</sup> | 195 <sup>c</sup>                 | –                                 | – <sup>c</sup>               | –                        |
| 39 | 3,4,5-Trinitro-1H-pyrazole                                                     | C <sub>3</sub> H <sub>3</sub> N <sub>5</sub> O <sub>6</sub>   | <b>TNP</b>    | 99.8 <sup>a</sup> | 186.3±0.6 <sup>f</sup>           | 182-184[62]<br>187[63]<br>186[56] | 24.9±1.9                     | 28.2[64]<br>28.8[63]     |

|    |                                                                 |                                                             |                  |                   |                            |                                 |                           |        |
|----|-----------------------------------------------------------------|-------------------------------------------------------------|------------------|-------------------|----------------------------|---------------------------------|---------------------------|--------|
| 40 | 1-Methyl-3,4,5-trinitropyrazole                                 | C <sub>4</sub> H <sub>3</sub> N <sub>5</sub> O <sub>6</sub> | <b>MTNP</b>      | 99.8 <sup>a</sup> | 90.6 ± 0.5 <sup>d,f</sup>  | 90.8[56]<br>91.3[65]            | 19.2 ± 1.7 <sup>d</sup>   | 17[63] |
| 41 | 3,6-Dinitropyrazolo[4,3-c]pyrazole                              | C <sub>4</sub> H <sub>2</sub> N <sub>6</sub> O <sub>4</sub> | <b>DNPPy</b>     | P                 | –                          | –                               | –                         | –      |
| 42 | 1,2,9,10-Tetranitrodipyrzolo[1,5-d:5',1'-f][1,2,3,4]-tetrazine, | C <sub>6</sub> N <sub>10</sub> O <sub>8</sub>               | <b>TNDPT</b>     | P                 | 195.5 ± 1.6 <sup>c</sup>   | 205 <sup>b</sup> [66]           | – <sup>c</sup>            | –      |
| 43 | 2,6-Diamino-3,5-dinitropyrazine                                 | C <sub>4</sub> H <sub>4</sub> N <sub>6</sub> O <sub>4</sub> | <b>ANPZ</b>      | P                 | –                          | –                               | –                         | –      |
| 44 | 2,6-Diamino-3,5-dinitropyrazine-1-oxide                         | C <sub>4</sub> H <sub>4</sub> N <sub>6</sub> O <sub>5</sub> | <b>LLM-105</b>   | P                 | –                          | –                               | –                         | –      |
| 45 | 5-Amino-3-nitro-1H-1,2,4-triazole                               | C <sub>2</sub> H <sub>3</sub> N <sub>5</sub> O <sub>2</sub> | <b>ANTA</b>      | P                 | 242.4 <sup>c</sup>         | –                               | – <sup>c</sup>            | –      |
| 46 | 3-Nitro-1,2,4-triazol-5-one                                     | C <sub>2</sub> H <sub>3</sub> N <sub>5</sub> O <sub>2</sub> | <b>NTO</b>       | P                 | –                          | –                               | –                         | –      |
| 47 | 1H-Tetrazol-5-ylamine hydrate                                   | CH <sub>3</sub> N <sub>5</sub>                              | <b>5-ATZ</b>     | P                 | 205.1 ± 0.2                | 205[67]<br>203[68]              | – <sup>c</sup>            | –      |
| 48 | 1,5-Diaminotetrazole                                            | CH <sub>4</sub> N <sub>6</sub>                              | <b>DAT</b>       | 99.9 <sup>a</sup> | 187.3 ± 0.8                | 187-188[69]                     | 26.7 ± 1.4 <sup>c</sup>   | –      |
| 49 | 5,5'-Bi-1H-tetrazole                                            | C <sub>2</sub> H <sub>2</sub> N <sub>8</sub>                | <b>BTZ</b>       | P                 | –                          | –                               | –                         | –      |
| 50 | 5,5'-Bistetrazole-1,1'-diol hydrate                             | C <sub>2</sub> H <sub>6</sub> N <sub>8</sub> O <sub>4</sub> | <b>BTO</b>       | P                 | –                          | –                               | –                         | –      |
| 51 | 3-Phenyl-1,2,3,4-oxatriazolium-5-olat                           | C <sub>7</sub> H <sub>5</sub> N <sub>3</sub> O <sub>2</sub> | <b>Ph-Azs</b>    | P[70]             | 81.7 ± 0.5                 | –                               | 20.8 ± 0.5                | –      |
| 52 | 3-(4-Tolyl)-1,2,3,4-oxatriazolium-5-olat                        | C <sub>8</sub> H <sub>7</sub> N <sub>3</sub> O <sub>2</sub> | <b>4-Tol-Azs</b> | P[70]             | 98.7 ± 1.1 <sup>f</sup>    | –                               | 20.5 ± 0.3                | –      |
| 53 | 3-Amino-4-nitro-1,2,5-oxadiazole                                | C <sub>3</sub> H <sub>3</sub> N <sub>3</sub> O <sub>4</sub> | <b>ANF</b>       | 99.4 <sup>a</sup> | 123.8 ± 0.8 <sup>d,f</sup> | 121[71]                         | 27.6 ± 1.7 <sup>d</sup>   | –      |
| 54 | 3,4-Diaminofurazan                                              | C <sub>2</sub> H <sub>4</sub> N <sub>4</sub> O              | <b>DAF</b>       | 99.9 <sup>a</sup> | 179.9 ± 0.3 <sup>d</sup>   | 179-180[72]                     | 23.1 ± 0.4 <sup>d</sup>   | –      |
| 55 | 3,4-Di(nitramino)furazan                                        | C <sub>2</sub> H <sub>2</sub> N <sub>6</sub> O <sub>5</sub> | <b>DNAF</b>      | P                 | 94.2 <sup>c</sup>          | 93[73]                          | – <sup>c</sup>            | –      |
| 56 | 3,3'-Diamino-4,4'-azofurazan                                    | C <sub>4</sub> H <sub>4</sub> N <sub>8</sub> O <sub>2</sub> | <b>DAAzF</b>     | P                 | –                          | 325[74]                         | –                         | –      |
| 57 | 3,3'-Diamino-4,4'-azoxyfurazan                                  | C <sub>4</sub> H <sub>4</sub> N <sub>8</sub> O <sub>3</sub> | <b>DAAF</b>      | P                 | 253.9 <sup>c</sup>         | 249[74]                         | – <sup>c</sup>            | –      |
| 58 | 3-Methyl-4-nitro-1,2,5-oxadiazole 2-oxide                       | C <sub>3</sub> H <sub>3</sub> N <sub>3</sub> O <sub>4</sub> | <b>34-MNF</b>    | P                 | 60; 65                     | 67-68[75]                       | 21.3 ± 0.4                | –      |
| 59 | 4-Methyl-3-nitro-1,2,5-oxadiazole 2-oxide                       | C <sub>3</sub> H <sub>3</sub> N <sub>3</sub> O <sub>4</sub> | <b>43-MNF</b>    | 99.7 <sup>a</sup> | 40.7 ± 0.3 <sup>f</sup>    | –                               | 15.1 ± 0.2                | –      |
| 60 | 3-Cyano-4-nitrofuroxan                                          | C <sub>3</sub> N <sub>4</sub> O <sub>4</sub>                | <b>34-CNF</b>    | 99.6 <sup>a</sup> | 48.1 ± 0.3 <sup>d,f</sup>  | 48-49[76]                       | 22.8 ± 0.9 <sup>d</sup>   | –      |
| 61 | Benzotris[1,2,5]oxadiazole, 1,4,7-trioxide                      | C <sub>6</sub> N <sub>6</sub> O <sub>6</sub>                | <b>BTF</b>       | 99.3 <sup>a</sup> | 197.1 ± 0.4 <sup>d,f</sup> | 194-195[77] 196-197[78] 201[79] | 22.7 ± 1.6 <sup>c,d</sup> | –      |

|    |                                      |                                              |             |       |                            |   |                         |   |
|----|--------------------------------------|----------------------------------------------|-------------|-------|----------------------------|---|-------------------------|---|
| 62 | 4-nitro-(4-nitrofurazan-3-yl)furoxan | C <sub>4</sub> N <sub>6</sub> O <sub>7</sub> | <b>NNFF</b> | P[80] | 105.7 ± 1.1 <sup>d,f</sup> | – | 33.0 ± 2.8              | – |
| 63 | 4,4'-Dinitro-3,3'-bisfuroxan         | C <sub>4</sub> N <sub>6</sub> O <sub>8</sub> | <b>DNBF</b> | P[81] | 134.5 ± 0.5 <sup>c</sup>   | – | 24.9 ± 3.3 <sup>c</sup> | – |

<sup>a</sup> The purity is determined by DSC.

<sup>b</sup> The purity determined by NMR with an internal standard.

<sup>c</sup> Melting upon decomposition.

<sup>d</sup> High pressure DSC was used to suppress evaporation.

<sup>e</sup> The enthalpy value was corrected to account for a slight mass loss (<10%).

<sup>f</sup> The melting temperature for pure sample obtained from the Van't-Hoff equation [82].

<sup>g</sup> The phase transition instead of melting observed with the following parameters:

CL-20: the temperature onset 164.3±0.5°C, the enthalpy 6.9±0.9 kJ/mol in agreement with 7.2[83] and 7.9±0.4[84] kJ/mol

HMX: the temperature onset 189.9±2.0°C, the enthalpy 8.3±0.9 kJ/mol in agreement with 9.8±0.8[38] kJ/mol

FOX-7: the temperature onset 120.5±1.2°C, the enthalpy 2.5±0.2 kJ/mol in agreement with 3.2±0.5[85] kJ/mol and the temperature onset 166.0±0.9°C, enthalpy 2.8±0.5 kJ/mol in agreement with 2.6±0.5[85] kJ/mol

<sup>h</sup> The peak temperature was reported in the original paper, while all temperature values in present study correspond to the extrapolated onset of the peak.

## S2. Thermal corrections of the phase change data

The enthalpy data obtained at elevated temperature can be corrected to the standard conditions (298 K) using several approaches. Since the heat capacity values for novel energetic materials are often unknown, semiempirical corrections were considered either with the constant  $\Delta c_p^{s \rightarrow g}$ : [86]

$$\Delta_s^g H_m^0 = \Delta_s^g H_m(T_{ave}) + 0.032 \cdot (T_{ave} - 298.15), \quad (S1)$$

or with an estimated solid-state heat capacity by group additivity methods: [86]

$$\Delta_s^g H_m^0 = \Delta_s^g H_m(T_{ave}) + [0.75 + 0.15 \cdot c_p^s(estd)] (T_{ave} - 298.15), \quad (S2)$$

or with a gas-phase heat capacity only: [87]

$$\Delta_s^g H_m^0 = \Delta_s^g H_m(T_{ave}) + [-0.9 + 0.176 \cdot c_p^g] (T_{ave} - 298.15), \quad (S3)$$

The enthalpy of vaporization can be corrected analogously – via adjustment with a constant  $\Delta c_p^{l \rightarrow g}$ : [88]

$$\Delta_l^g H_m^0 = \Delta_l^g H_m(T_{ave}) + 0.054 \cdot (T_{ave} - 298.15), \quad (S4)$$

or via an estimated liquid-state heat capacity: [86]

$$\Delta_l^g H_m^0 = \Delta_l^g H_m(T_{ave}) + [0.58 + 0.26 \cdot c_p^l(estd)] (T_{ave} - 298.15). \quad (S5)$$

For a subset of selected compounds we compared the accurate temperature corrections using Eq. (5) with accounting for temperature dependence of the solid-state heat capacity (from DSC data or from literature) and the gas-phase heat capacity (obtained by quantum chemical calculations) with the approximations (S1) - (S5).

**Table S2.** Thermal adjustment of the sublimation enthalpy data by various methods

| Compound      | Thermal correction value (second term in Eq. 5) |             |             |             | Error       |             |             |
|---------------|-------------------------------------------------|-------------|-------------|-------------|-------------|-------------|-------------|
|               | exact $\Delta c_p^{s \rightarrow g}$            | Equation S1 | Equation S2 | Equation S3 | Equation S1 | Equation S2 | Equation S3 |
| <b>ACM</b>    | 0.5                                             | 1.2         | 0.5         | 0.5         | 0.7         | 0.0         | 0.0         |
| <b>Urea</b>   | 0.8                                             | 1.2         | 0.6         | 0.5         | 0.4         | -0.3        | -0.4        |
| <b>Val</b>    | 4.8                                             | 6.3         | 5.0         | 5.1         | 1.6         | 0.2         | 0.4         |
| <b>BCA</b>    | 2.0                                             | 2.2         | 1.6         | 1.4         | 0.2         | -0.4        | -0.6        |
| <b>NPH</b>    | 1.4                                             | 1.1         | 0.9         | 0.7         | -0.3        | -0.5        | -0.6        |
| <b>ADM</b>    | 1.8                                             | 1.2         | 1.0         | 0.9         | -0.6        | -0.7        | -0.9        |
| <b>ANT</b>    | 5.8                                             | 4.6         | 4.6         | 4.3         | -1.2        | -1.2        | -1.4        |
| <b>tAB</b>    | 0.8                                             | 0.5         | 0.6         | 0.5         | -0.2        | -0.2        | -0.2        |
| <b>TPL</b>    | 3.0                                             | 6.8         | 6.4         | 6.8         | 3.9         | 3.4         | 3.9         |
| <b>DB18C6</b> | 5.9                                             | 3.6         | 7.5         | 7.4         | -2.4        | 1.6         | 1.5         |



|                            |      |     |      |     |       |      |       |
|----------------------------|------|-----|------|-----|-------|------|-------|
| <b>DNAN</b>                | 1.2  | 1.3 | 1.4  | 1.4 | 0.2   | 0.3  | 0.2   |
| <b>TNT</b>                 | 1.9  | 1.1 | 1.4  | 1.3 | -0.8  | -0.5 | -0.6  |
| <b>Tetryl</b>              | 4.0  | 2.5 | 3.6  | 3.6 | -1.5  | -0.4 | -0.5  |
| <b>FOX-7</b>               | 5.4  | 5.2 | 4.4  | 4.1 | -0.2  | -1.0 | -1.3  |
| <b>NIGU</b>                | 2.5  | 3.8 | 2.3  | 2.2 | 1.3   | -0.2 | -0.4  |
| <b>DNPP</b>                | 6.4  | 4.9 | 5.8  | 4.6 | -1.5  | -0.6 | -1.8  |
| <b>RDX</b>                 | 4.1  | 2.4 | 2.7  | 2.4 | -1.8  | -1.5 | -1.7  |
| <b>HMX</b>                 | 6.7  | 4.5 | 8.1  | 6.6 | -2.2  | 1.4  | -0.1  |
| <b>TEX</b>                 | 4.1  | 6.9 | 7.3  | 7.5 | 2.8   | 3.2  | 3.4   |
| <b>CL-20</b>               | 19.7 | 4.7 | 10.5 | 9.5 | -14.9 | -9.2 | -10.2 |
| <b>PETN</b>                | 4.9  | 2.3 | 3.7  | 3.6 | -2.6  | -1.2 | -1.3  |
| <b>5-ADP</b>               | 4.6  | 4.0 | 3.5  | 3.4 | -0.6  | -1.1 | -1.3  |
| <b>LLM-105</b>             | 3.4  | 5.4 | 5.4  | 5.9 | 2.0   | 2.0  | 2.5   |
| <b>NTO</b>                 | 1.4  | 3.2 | 1.8  | 1.9 | 1.8   | 0.4  | 0.5   |
| <b>DAF</b>                 | 6.3  | 4.3 | 3.0  | 2.3 | -2.0  | -3.4 | -4.1  |
| <b>DAAzF</b>               | 3.1  | 3.3 | 3.4  | 3.4 | 0.2   | 0.3  | 0.3   |
|                            |      |     |      |     |       |      |       |
| Average deviation          |      |     |      |     | -0.7  | -0.4 | -0.6  |
| Absolute average deviation |      |     |      |     | 1.8   | 1.3  | 1.5   |
| Maximal absolute deviation |      |     |      |     | 14.9  | 9.2  | 10.2  |

**Table S3.** Thermal corrections to the evaporation enthalpy data by various methods.

| Corrections   | correction                           |             |             | difference  |             |
|---------------|--------------------------------------|-------------|-------------|-------------|-------------|
|               | exact $\Delta C_p^{l \rightarrow g}$ | Equation S4 | Equation S5 | Equation S4 | Equation S5 |
| <b>ACM</b>    | 6.6                                  | 4.9         | 4.4         | -1.7        | -2.3        |
| <b>BCA</b>    | 11.1                                 | 7.0         | 7.7         | -4.0        | -3.4        |
| <b>NPH</b>    | 5.6                                  | 4.7         | 5.4         | -0.9        | -0.2        |
| <b>tAB</b>    | 3.0                                  | 6.7         | 10.2        | 3.7         | 7.2         |
| <b>DB18C6</b> | 45.8                                 | 12.4        | 39.2        | -33.4       | -6.6        |

|                                  |     |     |     |      |      |
|----------------------------------|-----|-----|-----|------|------|
| <b>FEFO</b>                      | 5.7 | 1.6 | 3.9 | -4.1 | -1.7 |
|                                  |     |     |     |      |      |
| Average deviation (AD)           |     |     |     | -6.7 | -1.2 |
| Absolute average deviation (AAD) |     |     |     | 6.8  | 3.1  |
| Maximal absolute deviation (MAD) |     |     |     | 33.4 | 7.2  |

### S3. Summary of the experimental sublimation and vaporization enthalpies.

**Table S4.** Comparison of the experimentally determined sublimation and evaporation enthalpies with the literature data.

| # | Compound    | $\Delta H_{ev}$ (298 K) / kJ mol <sup>-1</sup> |                                                                                                                                                   | Details                                                                | $\Delta H_s$ (298 K) / kJ mol <sup>-1</sup> |                                                                                 |                       |                               | Details                                                                 |
|---|-------------|------------------------------------------------|---------------------------------------------------------------------------------------------------------------------------------------------------|------------------------------------------------------------------------|---------------------------------------------|---------------------------------------------------------------------------------|-----------------------|-------------------------------|-------------------------------------------------------------------------|
|   |             | this study                                     | literature                                                                                                                                        |                                                                        | this study                                  | literature                                                                      | evaporation + melting | Trouton-Williams equation (4) |                                                                         |
| 1 | <b>ACM</b>  | 65.6 ±2.8                                      | 68.6[89] <sup>a</sup><br>65.2[90] <sup>a</sup>                                                                                                    | Argon flow, $\beta$ = 0.15-5 K min <sup>-1</sup> , 3 runs, <T> = 120°C | 83.2 ±1.6                                   | 80.3[91]<br>78.3[2] <sup>a</sup>                                                | 78.7 ± 3.0            | 66                            | Argon flow, $\beta$ = 0.15-0.3 K min <sup>-1</sup> , 3 runs, <T> = 64°C |
| 2 | <b>Urea</b> |                                                |                                                                                                                                                   |                                                                        | 97.2 ±1.9                                   | 95.5[92] (tr)<br>96.3[93] (cl)<br>98.3[94] (to)<br>76.9[95] (to)<br>89[96] (ef) |                       | 77                            | Vacuum, $\beta$ = 0.1-1 K min <sup>-1</sup> , 4 runs, <T> = 63°C        |
| 3 | <b>Val</b>  |                                                |                                                                                                                                                   |                                                                        | 135.1 ±2.2                                  | 167.8[97] <sup>a</sup>                                                          |                       | 107                           | Argon flow, $\beta$ = 0.5-5 K min <sup>-1</sup> , 3 runs, <T> = 223°C   |
| 4 | <b>BCA</b>  | 75.3 ±2.8                                      | 73.2[98] <sup>a</sup> (tr)<br>69.3[99] <sup>a</sup> (tg)<br>72.4[4] <sup>a</sup> (is)<br>76.5[100] <sup>a</sup> (ma)<br>83[101] <sup>a</sup> (ch) | Argon flow, $\beta$ = 1-5 K min <sup>-1</sup> , 4 runs, <T> = 155°C    | 94.0 ±1.6                                   | 89.7±1.0[102] (cl)<br>90± 4[4] (re)<br>89.5±0.2[103] (re)<br>95.1±1.8[104] (ef) | 88.5 ± 3.1            | 75                            | Argon flow, $\beta$ = 0.15-2 K min <sup>-1</sup> , 8 runs, <T> = 95°C   |
| 5 | <b>NPH</b>  | 52.5 ±3.0                                      | 53.4[14] (ch)<br>54.8[105] (eb)<br>50.3[106] (ma)                                                                                                 | Argon flow, $\beta$ = 0.5-5 K min <sup>-1</sup> , 4 runs, <T> = 112°C  | 73.4 ±1.2                                   | 72.6±0.6 [102] (re)<br>71± 5[4] (re)<br>72.8±0.8 [103] (cl)                     | 71.5 ±3.4             | 66                            | Argon flow, $\beta$ = 0.1-0.5 K min <sup>-1</sup> , 5 runs, <T> = 59°C  |
| 6 | <b>ADM</b>  |                                                |                                                                                                                                                   |                                                                        | 62.7 ±1.9                                   | 59±4[4] (re)<br>59.1±0.9[107] (re)                                              |                       | 102                           | Argon flow, $\beta$ = 0.1-5 K min <sup>-1</sup> , 4 runs, <T> = 61°C    |

|    |               |                |                                                                                                |                                                                                |               |                                                                                                 |             |     |                                                                             |
|----|---------------|----------------|------------------------------------------------------------------------------------------------|--------------------------------------------------------------------------------|---------------|-------------------------------------------------------------------------------------------------|-------------|-----|-----------------------------------------------------------------------------|
| 7  | <b>ANT</b>    |                | 77.8[108] <sup>a</sup><br>(ch)<br>75.1[109] <sup>a</sup><br>(ch)<br>77.5[16] <sup>a</sup> (ds) |                                                                                | 103.0<br>±2.5 | 103.4±2.7<br>[102] (re)<br>100.4±4.2<br>[103] (re)                                              |             | 92  | Argon flow, $\beta = 0.5-5$<br>K min <sup>-1</sup> , 4 runs, <T> =<br>169°C |
| 8  | <b>tAB</b>    | 74.1 ±1.6      | 72.8[19]                                                                                       | Argon flow, $\beta =$<br>1-5 K min <sup>-1</sup> , 3<br>runs, <T> =<br>149°C   | 92.8<br>±1.9  | 93.8 ±0.4[4]<br>(re)                                                                            | 96.6 ±3.6   | 64  | Vacuum, $\beta = 0.1-2$ K<br>min <sup>-1</sup> , 3 runs, <T> =<br>42°C      |
| 9  | <b>HPX</b>    |                |                                                                                                |                                                                                | 161.9<br>±2.8 | 162.5[110]<br>162.9[111] <sup>a</sup>                                                           |             | 128 | Argon flow, $\beta = 0.5-5$<br>K min <sup>-1</sup> , 3 runs, <T> =<br>349°C |
| 10 | <b>TPL</b>    | 106.7 ±2.3     |                                                                                                | Argon flow, $\beta =$<br>1-5 K min <sup>-1</sup> , 4<br>runs, <T> =<br>311°C   | 130.8<br>±2.3 | 136.3[112] <sup>a</sup><br>138.5[112] <sup>a</sup><br>132.5[113] (fs)<br>129.9[22] <sup>a</sup> | 132.0 ±4.1  | 102 | Argon flow, $\beta = 0.5-5$<br>K min <sup>-1</sup> , 5 runs, <T> =<br>239°C |
| 11 | <b>D18C6</b>  | 130.9<br>±15.2 | 137[24]<br>154.1[23]                                                                           | Argon flow, $\beta =$<br>0.5-5 K min <sup>-1</sup> , 3<br>runs, <T> =<br>254°C | 167.0<br>±5.4 | 178.4[24]<br>180.2[24]<br>190.6[23]                                                             | 168.6 ±16.7 | 82  | Vacuum, $\beta = 0.2-1$ K<br>min <sup>-1</sup> , 3 runs, <T> =<br>137°C     |
| 12 | <b>4-NPA</b>  | 66.7 ±3.1      |                                                                                                | Argon flow, $\beta =$<br>0.5-5 K min <sup>-1</sup> , 3<br>runs, <T> =<br>117°C |               | 81[26]<br>79.5[114]                                                                             | 89.7 ±4.4   | 65  |                                                                             |
| 13 | <b>24-DNT</b> | 77.1 ±3.0      | 75.3[115] (re)<br>76[89] <sup>a</sup>                                                          | Argon flow, $\beta =$<br>0.5-5 K min <sup>-1</sup> , 3<br>runs, <T> =<br>153°C | 100.6<br>±2.1 | 94[115] (re)<br>96.0[116] <sup>a</sup><br>94.5[117] <sup>a</sup><br>83.3[118] <sup>a</sup>      | 99.8 ±3.9   | 64  | Vacuum, $\beta = 0.15-0.5$<br>K min <sup>-1</sup> , 3 runs, <T> =<br>50°C   |
| 14 | <b>DNAN</b>   | 86.4 ±3.5      | 57.2 (comptd)<br>[119]                                                                         | Argon flow, $\beta =$<br>0.5-2 K min <sup>-1</sup> , 3<br>runs, <T> =<br>172°C | 107.1<br>±1.4 |                                                                                                 | 104.2 ±4.4  | 68  | Vacuum, $\beta = 0.2-1$ K<br>min <sup>-1</sup> , 4 runs, <T> =<br>67°C      |
| 15 | <b>TNT</b>    | 90.7 ±3.7      | 89.8[115] (re)<br>86.6±0.4[103]<br>(cl)                                                        | Argon flow, $\beta =$<br>1-10 K min <sup>-1</sup> , 4<br>runs, <T> =           | 110.7<br>±2.6 | 114.1[115] (re)<br>113.2±1.5[120]<br>(ef)                                                       | 110.2±4.1   | 67  | Vacuum, $\beta = 0.5-5$ K<br>min <sup>-1</sup> , 4 runs, <T> =<br>60°C      |

|    |               |           |                       |                                                                                                 |               |                                                                         |           |                 |                                                                                                                 |
|----|---------------|-----------|-----------------------|-------------------------------------------------------------------------------------------------|---------------|-------------------------------------------------------------------------|-----------|-----------------|-----------------------------------------------------------------------------------------------------------------|
|    |               |           | 87.0±1.9[120]<br>(ef) | 192°C                                                                                           |               | 106.3±0.4[103]<br>(cl)<br>118.0±0.8[103]<br>(cl)                        |           |                 |                                                                                                                 |
| 16 | <b>Tetryl</b> |           |                       |                                                                                                 | 136.0<br>±3.1 | 133.1[121]<br>133.8±1.6[120]<br>(ef)                                    |           | 76              | Vacuum, $\beta = 0.2-0.5$ K<br>$\text{min}^{-1}$ , up to DSC<br>growth, 5 runs, $\langle T \rangle =$<br>188 °C |
| 17 | <b>FOX-7</b>  |           |                       |                                                                                                 | 119.4<br>±3.3 | 116[122] <sup>c</sup><br>104[123] <sup>c</sup><br>152[124] <sup>c</sup> |           | 90 <sup>b</sup> | Vacuum, $\beta = 0.15-1$ K<br>$\text{min}^{-1}$ , up to DSC<br>growth, 5 runs, $\langle T \rangle =$<br>188 °C  |
| 18 | <b>TNAA</b>   |           |                       |                                                                                                 | 101.2<br>±1.7 |                                                                         |           | 69              | Vacuum, $\beta = 0.05-0.25$<br>K $\text{min}^{-1}$ , 5 runs, $\langle T \rangle =$<br>51 °C                     |
| 19 | <b>FEFO</b>   | 93.3 ±7.4 | 85.1[125]             | Vacuum, $\beta = 0.5-2$<br>K $\text{min}^{-1}$ , 3 runs,<br>$\langle T \rangle = 54$ °C         |               |                                                                         |           | 54              |                                                                                                                 |
| 20 | <b>NIGU</b>   |           |                       |                                                                                                 | 141.6<br>±2.4 | 142.7 [120]<br>139.7[126]                                               |           | 83              | Vacuum, $\beta = 0.05-1$ K<br>$\text{min}^{-1}$ , 4 runs, $\langle T \rangle =$<br>145 °C                       |
| 21 | <b>DNDAP</b>  | 75.0 ±2.7 |                       | Argon flow, $\beta =$<br>0.5-2 K $\text{min}^{-1}$ , 3<br>runs, $\langle T \rangle =$<br>122°C  |               | 102.5[127]                                                              | 95.6 ±3.8 | 62              |                                                                                                                 |
| 22 | <b>DNPP</b>   | 78.6 ±1.3 |                       | Argon flow, $\beta =$<br>0.75-2 K $\text{min}^{-1}$ , 3<br>runs, $\langle T \rangle =$<br>234°C | 111.1<br>±1.0 | 112.7±0.8[128]<br><sup>a</sup> (ef)<br>102.9±<br>1.2[127] (ef)          | 113.7±2.4 | 92              | Argon flow, $\beta = 0.75-2$<br>K $\text{min}^{-1}$ , 4 runs, $\langle T \rangle =$<br>177°C                    |
| 23 | <b>RDX</b>    |           |                       |                                                                                                 | 130.4<br>±2.3 | 128.0±1.3[127]<br>(cl)<br>127.1[115](re)<br>150[129] <sup>c</sup> (bu)  |           | 90              | Vacuum, $\beta = 0.15-0.35$<br>K $\text{min}^{-1}$ , 5 runs, $\langle T \rangle =$<br>99°C                      |
| 24 | <b>HMX</b>    |           |                       |                                                                                                 | 179.1<br>±7.0 | 161.0±0.3[120]<br>(ef) 164.4±1.7<br>[103](cl)                           |           | 104             | Vacuum, $\beta = 0.1-0.2$ K<br>$\text{min}^{-1}$ , 3 runs, $\langle T \rangle =$<br>165°C (all data before      |

|    |               |           |  |                                                                         |               |                                                                                                    |           |                  |                                                                              |
|----|---------------|-----------|--|-------------------------------------------------------------------------|---------------|----------------------------------------------------------------------------------------------------|-----------|------------------|------------------------------------------------------------------------------|
|    |               |           |  |                                                                         |               | 176.1±1.7<br>[127](cl)<br>174.7[130] <sup>c</sup><br>(ef) 180[129] <sup>c</sup><br>(bu)            |           |                  | phase transition)                                                            |
| 25 | <b>DATN</b>   |           |  |                                                                         | 230.8<br>±8.0 | 195[131] (ri)                                                                                      |           | 85               | Vacuum, $\beta = 0.04-0.15$<br>K min <sup>-1</sup> , 4 runs, <T> =<br>156 °C |
| 26 | <b>BC-HMX</b> |           |  |                                                                         | 134.6<br>±2.5 |                                                                                                    |           | 97 <sup>b</sup>  | Vacuum, $\beta = 0.2-1$ K<br>min <sup>-1</sup> , 4 runs, <T> =<br>170 °C     |
| 27 | <b>TEX</b>    |           |  |                                                                         | 130.9<br>±2.4 | ~130[132]                                                                                          |           | 104 <sup>b</sup> | Argon flow, $\beta = 0.5-5$<br>K min <sup>-1</sup> , 4 runs, <T> =<br>240 °C |
| 28 | <b>CL-20</b>  |           |  |                                                                         | 171.9<br>±3.2 | 157±20[133]<br>(po) 168[129] <sup>c</sup><br>(bu) 226.8±4.6<br>[127](ph)                           |           | 95 <sup>b</sup>  | Vacuum, $\beta = 0.15-0.35$<br>K min <sup>-1</sup> , 5 runs, <T> =<br>173 °C |
| 29 | <b>ETN</b>    | 92.7 ±2.4 |  | Vacuum, $\beta = 0.2-1$<br>K min <sup>-1</sup> , 4 runs,<br><T> = 74 °C | 139.5<br>±3.0 | 118.5[51] <sup>a</sup>                                                                             | 127.6±5.7 | 63               | Vacuum, $\beta = 0.1-1$ K<br>min <sup>-1</sup> , 5 runs, <T> = 50<br>°C      |
| 30 | <b>PETN</b>   |           |  | -                                                                       | 147.6<br>±3.5 | 150.8 [115]<br>(re)<br>150.4±1.3[120]<br>(ef)<br>150.6±1.8[134]<br>(tg?) 149.2[51]<br><sup>a</sup> | -         | 78               | Vacuum, $\beta = 0.4-1$ K<br>min <sup>-1</sup> , 3 runs, <T> = 97<br>°C      |
| 31 | <b>SMX</b>    |           |  |                                                                         | 166.3<br>±3.5 | 106[51] <sup>a</sup><br>164±20[135]<br>(po)                                                        |           | 68               | Vacuum, $\beta = 0.1-0.4$ K<br>min <sup>-1</sup> , 4 runs, <T> = 71<br>°C    |
| 32 | <b>PMDA</b>   |           |  |                                                                         | 85.6<br>±1.5  |                                                                                                    |           | 71               | Argon flow, $\beta = 0.5-2$<br>K min <sup>-1</sup> , 3 runs, <T> =<br>75 °C  |
| 33 | <b>24-DNI</b> |           |  |                                                                         | 112.1<br>±3.2 | 112.1[136]                                                                                         |           | 102              | Vacuum, $\beta = 0.2-1$ K<br>min <sup>-1</sup> , 3 runs, <T> =               |

|    |                |            |  |                                                                                               |               |                                           |            |     |                                                                                                |
|----|----------------|------------|--|-----------------------------------------------------------------------------------------------|---------------|-------------------------------------------|------------|-----|------------------------------------------------------------------------------------------------|
|    |                |            |  |                                                                                               |               |                                           |            |     | 134 °C                                                                                         |
| 34 | <b>45-DNI</b>  |            |  |                                                                                               | 119.0<br>±2.0 |                                           |            | 85  | Vacuum, $\beta = 0.2\text{-}1$ K min <sup>-1</sup> , 3 runs, $\langle T \rangle = 110$ °C      |
| 35 | <b>34-DNP</b>  | 99.6 ±2.4  |  | Vacuum, $\beta = 0.5\text{-}2$ K min <sup>-1</sup> , 6 runs, $\langle T \rangle = 114$ °C     | 113.8<br>±2.3 | 112.5±0.8[136]<br>(cl)<br>141.4[137] (tg) | 114.1 ±3.3 | 68  | Vacuum, $\beta = 0.03\text{-}0.1$ K min <sup>-1</sup> , 4 runs, $\langle T \rangle = 75$ °C    |
| 36 | <b>35-DNP</b>  | 89.3 ±2.0  |  | Argon flow, $\beta = 0.2\text{-}2$ K min <sup>-1</sup> , 3 runs, $\langle T \rangle = 199$ °C | 107.8<br>±1.3 |                                           | 104.0 ±2.7 | 83  | Argon flow, $\beta = 0.1\text{-}25$ K min <sup>-1</sup> , 4 runs, $\langle T \rangle = 145$ °C |
| 37 | <b>1-ADP</b>   | 100.1 ±4.6 |  | Argon flow, $\beta = 1\text{-}5$ K min <sup>-1</sup> , 3 runs, $\langle T \rangle = 211$ °C   |               |                                           | 119.0 ±6.8 | 72  |                                                                                                |
| 38 | <b>5-ADP</b>   |            |  |                                                                                               | 121.2<br>±2.0 |                                           |            | 88  | Vacuum, $\beta = 0.15\text{-}0.3$ K min <sup>-1</sup> , 4 runs, $\langle T \rangle = 150$ °C   |
| 39 | <b>TNP</b>     |            |  |                                                                                               | 121.5<br>±1.9 |                                           |            | 86  | Vacuum, $\beta = 0.5\text{-}2$ K min <sup>-1</sup> , 3 runs, $\langle T \rangle = 107$ °C      |
| 40 | <b>MTNP</b>    |            |  |                                                                                               | 104.8<br>±1.7 |                                           |            | 68  | Vacuum, $\beta = 0.2\text{-}2$ K min <sup>-1</sup> , 4 runs, $\langle T \rangle = 70$ °C       |
| 41 | <b>DNPPy</b>   |            |  |                                                                                               | 134.2<br>±4.4 |                                           |            | 112 | Vacuum, $\beta = 0.5\text{-}2$ K min <sup>-1</sup> , 3 runs, $\langle T \rangle = 172$ °C      |
| 42 | <b>TNDPT</b>   |            |  |                                                                                               | 122.0<br>±3.8 |                                           |            | 88  | Vacuum, $\beta = 0.2\text{-}1$ K min <sup>-1</sup> , 4 runs, $\langle T \rangle = 170$ °C      |
| 43 | <b>ANPZ</b>    |            |  |                                                                                               | 124.7<br>±2.3 |                                           |            | 119 | Vacuum, $\beta = 0.1\text{-}2$ K min <sup>-1</sup> , 4 runs, $\langle T \rangle = 180$ °C      |
| 44 | <b>LLM-105</b> |            |  |                                                                                               | 132.3<br>±3.9 | 135.6[138]<br>(est)<br>163.8[137]         |            | 114 | Vacuum, $\beta = 0.5\text{-}2$ K min <sup>-1</sup> , 3 runs, $\langle T \rangle = 193$ °C      |

|    |                  |           |  |                                                                                                |               |                     |            |                  |                                                                                             |
|----|------------------|-----------|--|------------------------------------------------------------------------------------------------|---------------|---------------------|------------|------------------|---------------------------------------------------------------------------------------------|
|    |                  |           |  |                                                                                                |               | 103.3[139] (ri)     |            |                  |                                                                                             |
| 45 | <b>ANTA</b>      |           |  |                                                                                                | 127.8<br>±3.3 |                     |            | 97               | Vacuum, $\beta = 0.2-1$ K<br>min <sup>-1</sup> , 3 runs, $\langle T \rangle =$<br>158 °C    |
| 46 | <b>NTO</b>       |           |  |                                                                                                | 122.8<br>±2.3 | 107.9[129]          |            | 102              | Vacuum, $\beta = 0.2-1$ K<br>min <sup>-1</sup> , 3 runs, $\langle T \rangle =$<br>126 °C    |
| 47 | <b>5-ATZ</b>     |           |  |                                                                                                | 116.0<br>±2.0 | 116.3±1.2[140]<br>a | -          | 90               | Vacuum, $\beta = 0.2-1$ K<br>min <sup>-1</sup> , 4 runs, $\langle T \rangle =$<br>110°C     |
| 48 | <b>DAT</b>       |           |  |                                                                                                | 109.6<br>±2.2 |                     |            | 87               | Vacuum, $\beta = 0.2-2$ K<br>min <sup>-1</sup> , 4 runs, $\langle T \rangle =$<br>125°C     |
| 49 | <b>BTZ</b>       |           |  |                                                                                                | 142.5<br>±2.8 |                     |            | 101 <sup>b</sup> | Vacuum, $\beta = 0.3-1$ K<br>min <sup>-1</sup> , 3 runs, $\langle T \rangle =$<br>166°C     |
| 50 | <b>BTO</b>       |           |  |                                                                                                | 141.2<br>±2.7 |                     |            | 95               | Vacuum, $\beta = 0.2-1$ K<br>min <sup>-1</sup> , 3 runs, $\langle T \rangle =$<br>178°C     |
| 51 | <b>Ph-Azs</b>    | 80.5 ±3.3 |  | Argon flow, $\beta =$<br>0.5-2 K min <sup>-1</sup> , 3<br>runs, $\langle T \rangle =$<br>152°C | 109.5<br>±1.7 |                     | 98.2 ± 3.8 | 67               | Vacuum, $\beta = 0.1-0.5$ K<br>min <sup>-1</sup> , 4 runs, $\langle T \rangle =$<br>44°C    |
| 52 | <b>4-Tol-Azs</b> | 77.1 ±3.6 |  | Argon flow, $\beta =$<br>1-10 K min <sup>-1</sup> , 3<br>runs, $\langle T \rangle =$<br>160°C  | 97.1<br>±2.4  |                     | 93.7 ± 3.9 | 70               | Vacuum, $\beta = 0.2-2$ K<br>min <sup>-1</sup> , 3 runs, $\langle T \rangle =$<br>66°C      |
| 53 | <b>ANF</b>       |           |  |                                                                                                | 93.3<br>±2.2  |                     | 90.0 ±4.7  | 74               | Argon flow, $\beta = 0.5-5$ K<br>min <sup>-1</sup> , 3 runs, $\langle T \rangle =$<br>92°C  |
| 54 | <b>DAF</b>       | 89.2 ±2.2 |  | Argon flow, $\beta =$<br>0.5-5 K min <sup>-1</sup> , 4<br>runs, $\langle T \rangle =$<br>206°C | 109.4<br>±4.1 |                     | 103.9 ±2.6 | 85               | Argon flow, $\beta = 0.5-5$<br>K min <sup>-1</sup> , 4 runs, $\langle T \rangle =$<br>160°C |
| 55 | <b>DNAF</b>      |           |  |                                                                                                | 133.3<br>±2.9 |                     |            | 69               | Vacuum, $\beta = 0.1-1$ K<br>min <sup>-1</sup> , 3 runs, $\langle T \rangle =$              |



|    |               |           |  |                                                                                                |               |                                        |            |     |                                                                                          |
|----|---------------|-----------|--|------------------------------------------------------------------------------------------------|---------------|----------------------------------------|------------|-----|------------------------------------------------------------------------------------------|
|    |               |           |  |                                                                                                |               |                                        |            |     | 69°C                                                                                     |
| 56 | <b>DAAzF</b>  |           |  |                                                                                                | 96.4<br>±3.7  | 103.5[141]<br>(calc)<br>99.6[142] (co) |            | 109 | Vacuum, $\beta = 0.1-2$ K<br>min <sup>-1</sup> , 3 runs, $\langle T \rangle =$<br>127°C  |
| 57 | <b>DAAF</b>   |           |  |                                                                                                | 117.1<br>±2.3 | 117.2[141]<br>(calc)<br>82.3[143]      |            | 99  | Vacuum, $\beta = 0.2-2$ K<br>min <sup>-1</sup> , 3 runs, $\langle T \rangle =$<br>153°C  |
| 58 | <b>34-MNF</b> | 67.5 ±1.8 |  | Argon flow, $\beta =$<br>0.5-5 K min <sup>-1</sup> , 3<br>runs, $\langle T \rangle =$<br>102°C |               |                                        | 86.6 ±2.2  | 64  |                                                                                          |
| 59 | <b>43-MNF</b> | 61.8 ±2.8 |  | Argon flow, $\beta =$<br>0.5-5 K min <sup>-1</sup> , 3<br>runs, $\langle T \rangle = 81$ °C    |               |                                        | 76.6 ±3.1  | 59  |                                                                                          |
| 60 | <b>34-CNF</b> | 72.5 ±2.6 |  | Argon flow, $\beta =$<br>0.5-2 K min <sup>-1</sup> , 3<br>runs, $\langle T \rangle = 91$ °C    |               |                                        | 94.0 ±3.5  | 60  |                                                                                          |
| 61 | <b>BTF</b>    | 95.4 ±4.6 |  | Argon flow, $\beta =$<br>0.5-5 K min <sup>-1</sup> , 3<br>runs, $\langle T \rangle =$<br>218°C | 107.1<br>±0.9 | 175.2±2.5[79] <sup>a</sup>             | 108.9 ±6.2 | 88  | Vacuum, $\beta = 0.2-1$ K<br>min <sup>-1</sup> , 3 runs, $\langle T \rangle =$<br>114 °C |
| 62 | <b>NNFF</b>   | 87.7 ±3.1 |  | Argon flow, $\beta =$<br>0.5-5 K min <sup>-1</sup> , 3<br>runs, $\langle T \rangle =$<br>123°C | 119.6<br>±1.9 |                                        |            | 71  | Vacuum, $\beta = 0.3-1$ K<br>min <sup>-1</sup> , 3 runs, $\langle T \rangle =$<br>54 °C  |
| 63 | <b>DNBF</b>   |           |  |                                                                                                | 106.5<br>±2.4 |                                        |            | 77  | Vacuum, $\beta = 0.5-1$ K<br>min <sup>-1</sup> , 3 runs, $\langle T \rangle = 69$<br>°C  |

<sup>a</sup>Corrected to RT with Eqs. (S1) and (S4).

<sup>b</sup>The onset temperature used in Eq.(4) instead of melting point.

<sup>c</sup>Corrected to RT with Eq.(S1) and phase transition enthalpy added.

Methods:

re – the values recommended upon the analysis of the available literature

bu – corrected to RT data from the pressure-time dependence obtained in burning tests  
cl – calorimetric technique.  
tr –transpiration  
is – isoteniscope  
ma – manometry  
ch – gas chromatography  
tg – thermogravimetric  
ds- DSC  
ef - Knudsen effusion method  
eb – ebulliometer  
ph - supposed to be equal to the experimental value of the activation energy of the phase transition.  
po – calculated by the Politzer approach  
ri – calculated by the Rice approach  
to – torsion-effusion method  
fs – fast scanning calorimetry

#### S4. Summary of the data fit with the modified Westwell-Trouton equation

Residuals:

| Min    | 1Q    | Median | 3Q   | Max   |
|--------|-------|--------|------|-------|
| -28160 | -5573 | 1113   | 7456 | 29514 |

Coefficients:

|    | Estimate | Std. Error | t value | Pr(> t )     |
|----|----------|------------|---------|--------------|
| Nh | 3268.12  | 494.72     | 6.606   | 4.33e-08 *** |
| Nn | 5294.95  | 965.86     | 5.482   | 1.93e-06 *** |
| Tm | 151.13   | 12.38      | 12.211  | 9.99e-16 *** |
| No | 3298.10  | 605.52     | 5.447   | 2.18e-06 *** |

---

Signif. codes: 0 '\*\*\*' 0.001 '\*\*' 0.01 '\*' 0.05 '.' 0.1 ' ' 1

Residual standard error: 12860 on 44 degrees of freedom

Multiple R-squared: 0.9895, Adjusted R-squared: 0.9885

F-statistic: 1036 on 4 and 44 DF, p-value: < 2.2e-16

**S5. Quantum chemical calculations of the gas-phase enthalpies of formation: Summary and literature data. Raw quantum chemical data: optimized geometries, electronic energies, and thermal corrections to thermodynamic potentials of all compounds under study**

**Table S5.** The results of quantum chemical calculations of  $\Delta_f H_m^0(g)$  along with the literature data. All value are calculated either with W1-F12 or W2-F12 multi-level techniques, except otherwise noted. All values are given in kJ/mol.

| Compound      | Present study | Literature (Method/Basis)                                                                   |
|---------------|---------------|---------------------------------------------------------------------------------------------|
| <b>ACM</b>    | -234.8        | -238.8 ±0.8[144] -236.5 (W3X-L) [145] -230.6 (G4MP2) [146]                                  |
| <b>Urea</b>   | -233.2        |                                                                                             |
| <b>Val</b>    | -466.6        | -476.5 (G4) -475.8 (isodesmic) [147]                                                        |
| <b>BCA</b>    | -296.9        | -298.6 (G4MP2) [146] -294.1±1.6 [148]                                                       |
| <b>NPH</b>    | 146.4         | 150.6±1.5 (review)[149] 146.2 (W1-F12) 146.9 (G4) [150]                                     |
| <b>ADM</b>    | -135.9        | -132.2±2.2 (exp) [107]                                                                      |
| <b>ANT</b>    | 225.8         | 229.4±2.9 (review)[149] 225.5 (W1-F12) 224.3 (G4) [150]                                     |
| <b>tAB</b>    | 407.6         | 405.5 ±1.3 (experiment) [19]                                                                |
| <b>HPX</b>    | 50.6          | 52.4 ±1.4 (experiment) 46 ± 4.6 (G4) [110]                                                  |
| <b>TPL</b>    | -228.7        | -232 ±8 (G3B3) [151]                                                                        |
| <b>DB18C6</b> | –             |                                                                                             |
| <b>4-NPA</b>  | 400.4         | 389.7 ±5.2 (experiment)[26] 393.9 (isodesmic) 384.3 (G4) [152]                              |
| <b>24-DNT</b> | 30.5          | 32.5±4 (isodesmic) 31.5(recommended) [152]                                                  |
| <b>DNAN</b>   | -75.9         |                                                                                             |
| <b>TNT</b>    | 48.8          | 24.1 ±3.5 (experiment)[29] 50.1±4 (isodesmic) 23.0 (G4) [152]                               |
| <b>Tetryl</b> | 164.2         | 165.7±4 (G4(MP2)+isodesmic) [152]                                                           |
| <b>FOX-7</b>  | 10.0          | 3.1±6.0[141]                                                                                |
| <b>TNAA</b>   | -16.3         | -38.1 (G4) -16.3 ±6.3 (G4+isodesmic) [40] -134.6 (isodesmic) [41] -174.9[153]               |
| <b>FEFO</b>   | –             |                                                                                             |
| <b>NIGU</b>   | 51.3          | 48.7±4 (G4+isodesmic) [154]                                                                 |
| <b>DNDA-5</b> | 41.3          | 51.0 ±0.8 (experiment) [127] 37.8±7 (G4+isodesmic) [154]                                    |
| <b>DNPP</b>   | 84.7          | 58 ±3 (experiment) [128] 49.8±2.1 (experiment) [127] 64.7±5 68.3 (G4) [155]                 |
| <b>RDX</b>    | 197.9         | 185.8 (B3LYP/6-31G(d,p)) [156] 196.2 (G4) [155] 190.8±5 [141] 195.0 ±1.7 (experiment) [127] |

|                |                     |                                                                                                            |
|----------------|---------------------|------------------------------------------------------------------------------------------------------------|
| <b>HMX</b>     | 259.9               | 247.7±7 253.9 (G4) [155] 261.9 ±2.5 (experiment) [127]                                                     |
| <b>DATN</b>    | 848.6               | 864.8 [131]                                                                                                |
| <b>BC-HMX</b>  | 318.7               |                                                                                                            |
| <b>TEX</b>     | -400.0              | -400.0 ±6.3 [157] -448.4 (B3LYP 6-31+G**) [158]                                                            |
| <b>CL-20</b>   | 548.5               | -548.5 ±6.3 [157] 601.7 ±4.6 (experiment) [127] 523.1 (G4) [155] 522.8±10 [141] 691.3 (B3LYP+6-31G*) [159] |
| <b>ETN</b>     | -356.7              |                                                                                                            |
| <b>PETN</b>    | -395.5              | -413.6 ±4[141]                                                                                             |
| <b>SMX</b>     | -375.3 <sup>a</sup> | -469 -674 [160] -415.7 ± 15 [135]                                                                          |
| <b>PMDA</b>    | 128.5               |                                                                                                            |
| <b>2,4-DNI</b> | 137.2               | 133.5 (G4MP2-SFM) [161]                                                                                    |
| <b>4,5-DNI</b> | 160.6               |                                                                                                            |
| <b>3,4-DNP</b> | 210.3               | 205.0 (B3P86/6-311G (d, p))[162]                                                                           |
| <b>3,5-DNP</b> | 190.6               |                                                                                                            |
| <b>1-ADP</b>   | 305.3               | 243.8 (MP2/6-311++G**) [61]                                                                                |
| <b>5-ADP</b>   | 196.5               | 165.7 (B3P86/6-311G (d, p))[162]                                                                           |
| <b>TNP</b>     | 253.6               | 142.7 (PM3)[163]                                                                                           |
| <b>MTNP</b>    | 233.0               | 230.1 (B3P86/6-311G (d, p))[162] -15.1 (PM3) [163]                                                         |
| <b>DNPPy</b>   | 414.5               |                                                                                                            |
| <b>TNDPT</b>   | 897.5               | 847.4 (MP2/6-311++G**) [66]                                                                                |
| <b>ANPZ</b>    | 119.9               | 98.3 (CBS-4M)[164]                                                                                         |
| <b>LLM-105</b> | 112.5               | 108.4 (ccCA-PS3) 94.1 (G4) [138] 126.8 (CBS-4M)[164]                                                       |
| <b>ANTA</b>    | 201.2               |                                                                                                            |
| <b>NTO</b>     | -4.2                | -14 (G4) -6.5 (isodesmic)[152] -3.8(B3LYP/6-31G(d,p)//B3LYP/6-31G(d,p))[156]                               |
| <b>5-ATZ</b>   | 329.0               | 325.1 (W1) [165] 325.3 ±3 [141]                                                                            |
| <b>DAT</b>     | 424.6               |                                                                                                            |
| <b>BTZ</b>     | 674.2               | 665.1 ±5[141]                                                                                              |
| <b>BTO</b>     | 669.7               | 689.1 (CBS-4M) [166]                                                                                       |
| <b>Ph-Azs</b>  | 175.1               |                                                                                                            |

|                  |                    |                                                       |
|------------------|--------------------|-------------------------------------------------------|
| <b>4-Tol-Azs</b> | 140.9              |                                                       |
| <b>ANF</b>       | 220.1              |                                                       |
| <b>DAF</b>       | 198.7              |                                                       |
| <b>DNAF</b>      | 347.9              |                                                       |
| <b>DAAzF</b>     | 653.3              | 639.3 ±7 [141]                                        |
| <b>DAAF</b>      | 616.4              | 605 ±5 [141]                                          |
| <b>DNAAF</b>     | 811.3 <sup>b</sup> | 798.3 (isodesmic) [167]                               |
| <b>34-MNF</b>    | 188.2              |                                                       |
| <b>43-MNF</b>    | 196.6              |                                                       |
| <b>34-CNF</b>    | 421.3              |                                                       |
| <b>BTF</b>       | 730.9              | 752.7 ±4.6 (experiment)[79] 489.5 (B3LYP/6-31G*)[168] |
| <b>NNFF</b>      | 521.2              |                                                       |
| <b>DNBF</b>      | 514.7              | 525.6 (CBS-4M) [169]                                  |

<sup>a</sup> W1-F12 atomization energies of the reactants and DLPNO-CCSD(T) enthalpy of the isodesmic reaction  $\text{SMX} + \text{C}_4\text{H}_{10} \rightarrow \text{ETN} + \text{C}_6\text{H}_{12}(\text{NO}_2)_2$ . <sup>b</sup> W1-F12 atomization energies of the reactants and DLPNO-CCSD(T) enthalpy of the isodesmic reaction  $\text{DNAAF} + (\text{azoxy bisfurazan}) \rightarrow 2 (\text{azoxy bis(furazano)nitraminofurazan})$ .

The raw computational data: B3LYP-D3BJ/def2-TZVPP geometries, zero-point vibrational energies (unscaled) and thermal corrections to thermodynamic potentials, W1-F12 and W2-F12 electronic energies. The species are named in accordance with Table 1 from the manuscript.

#### ACM

Zero-point correction= 0.072408 (Hartree/Particle)  
 Thermal correction to Energy= 0.077721  
 Thermal correction to Enthalpy= 0.078665  
 Thermal correction to Gibbs Free Energy= 0.043873

#### Electronic energy:

B3LYP = -209.3125834  
 W1-F12 = -209.31995003  
 W2-F12 = -209.32102852

| Center Number | Atomic Number | Atomic Type | Coordinates (Angstroms) |           |           |
|---------------|---------------|-------------|-------------------------|-----------|-----------|
|               |               |             | X                       | Y         | Z         |
| 1             | 6             | 0           | -0.075472               | 0.145704  | -0.002324 |
| 2             | 8             | 0           | -0.352171               | 1.329201  | 0.000092  |
| 3             | 6             | 0           | 1.358981                | -0.346721 | -0.000251 |
| 4             | 1             | 0           | 1.886660                | 0.119859  | -0.830609 |
| 5             | 1             | 0           | 1.837704                | -0.013833 | 0.920423  |
| 6             | 1             | 0           | 1.452321                | -1.429241 | -0.077571 |
| 7             | 7             | 0           | -1.035135               | -0.823209 | -0.000501 |
| 8             | 1             | 0           | -2.000258               | -0.540754 | 0.007793  |
| 9             | 1             | 0           | -0.814171               | -1.801080 | -0.001817 |

**Urea**

Zero-point correction= 0.062932 (Hartree/Particle)  
 Thermal correction to Energy= 0.067406  
 Thermal correction to Enthalpy= 0.068350  
 Thermal correction to Gibbs Free Energy= 0.037275

**Electronic energy:**

B3LYP = -225.3828217  
 W1-F12 = -225.39371507  
 W2-F12 = -225.39481251

| Center Number | Atomic Number | Atomic Type | Coordinates (Angstroms) |           |           |
|---------------|---------------|-------------|-------------------------|-----------|-----------|
|               |               |             | X                       | Y         | Z         |
| 1             | 6             | 0           | 0.000000                | 0.000000  | 0.143468  |
| 2             | 8             | 0           | 0.000000                | 0.000000  | 1.357738  |
| 3             | 7             | 0           | 0.000000                | 1.160155  | -0.608746 |
| 4             | 1             | 0           | -0.200216               | 1.988011  | -0.073352 |
| 5             | 1             | 0           | -0.411182               | 1.136624  | -1.526779 |
| 6             | 7             | 0           | 0.000000                | -1.160155 | -0.608746 |

|   |   |   |          |           |           |
|---|---|---|----------|-----------|-----------|
| 7 | 1 | 0 | 0.411182 | -1.136624 | -1.526779 |
| 8 | 1 | 0 | 0.200216 | -1.988011 | -0.073352 |

---

**Val**

Zero-point correction= 0.162341 (Hartree/Particle)  
 Thermal correction to Energy= 0.172007  
 Thermal correction to Enthalpy= 0.172951  
 Thermal correction to Gibbs Free Energy= 0.127638

**Electronic energy:**

B3LYP = -402.574404  
 W1-F12 = -402.57033900  
 W2-F12 = -402.57221050

---

| Center<br>Number | Atomic<br>Number | Atomic<br>Type | Coordinates (Angstroms) |           |           |
|------------------|------------------|----------------|-------------------------|-----------|-----------|
|                  |                  |                | X                       | Y         | Z         |
| 1                | 6                | 0              | 1.271138                | 0.393450  | -0.065944 |
| 2                | 1                | 0              | 1.758162                | 1.312634  | -0.403340 |
| 3                | 6                | 0              | 1.261501                | 0.408903  | 1.460561  |
| 4                | 1                | 0              | 0.847964                | -0.520300 | 1.859203  |
| 5                | 1                | 0              | 2.274708                | 0.509855  | 1.850918  |
| 6                | 1                | 0              | 0.665239                | 1.241157  | 1.831997  |
| 7                | 6                | 0              | 2.065306                | -0.784328 | -0.626713 |
| 8                | 1                | 0              | 1.665104                | -1.738331 | -0.288789 |
| 9                | 1                | 0              | 2.057357                | -0.785772 | -1.718621 |
| 10               | 1                | 0              | 3.104575                | -0.720419 | -0.301387 |
| 11               | 6                | 0              | -0.165970               | 0.518443  | -0.645461 |
| 12               | 1                | 0              | -0.114480               | 0.241526  | -1.707309 |
| 13               | 6                | 0              | -1.153057               | -0.456488 | -0.030018 |
| 14               | 8                | 0              | -2.178837               | -0.149937 | 0.520867  |
| 15               | 8                | 0              | -0.780683               | -1.745732 | -0.186656 |
| 16               | 1                | 0              | -1.468683               | -2.286981 | 0.226151  |
| 17               | 7                | 0              | -0.665765               | 1.871665  | -0.439139 |



|    |   |   |           |          |           |
|----|---|---|-----------|----------|-----------|
| 18 | 1 | 0 | -0.463866 | 2.463428 | -1.231391 |
| 19 | 1 | 0 | -1.663084 | 1.867025 | -0.271693 |

---

**BCA**

Zero-point correction= 0.114475 (Hartree/Particle)  
 Thermal correction to Energy= 0.121645  
 Thermal correction to Enthalpy= 0.122589  
 Thermal correction to Gibbs Free Energy= 0.082332

**Electronic energy:**

B3LYP = -421.025426  
 W1-F12 = -421.01269127  
 W2-F12 = -421.01464817

---

| Center<br>Number | Atomic<br>Number | Atomic<br>Type | Coordinates (Angstroms) |           |          |
|------------------|------------------|----------------|-------------------------|-----------|----------|
|                  |                  |                | X                       | Y         | Z        |
| 1                | 6                | 0              | 1.431375                | -1.717610 | 0.000000 |
| 2                | 1                | 0              | 2.422436                | -2.150046 | 0.000000 |
| 3                | 6                | 0              | 1.277963                | -0.340234 | 0.000000 |
| 4                | 6                | 0              | 0.000000                | 0.220347  | 0.000000 |
| 5                | 8                | 0              | -1.395968               | 2.135370  | 0.000000 |
| 6                | 8                | 0              | 0.820598                | 2.464456  | 0.000000 |
| 7                | 6                | 0              | 0.310323                | -2.542054 | 0.000000 |
| 8                | 6                | 0              | -0.964574               | -1.986783 | 0.000000 |
| 9                | 6                | 0              | -1.123001               | -0.608227 | 0.000000 |
| 10               | 1                | 0              | 0.430618                | -3.617077 | 0.000000 |
| 11               | 1                | 0              | -1.834973               | -2.628437 | 0.000000 |
| 12               | 1                | 0              | -2.109707               | -0.170716 | 0.000000 |
| 13               | 1                | 0              | 2.133763                | 0.319076  | 0.000000 |
| 14               | 6                | 0              | -0.112535               | 1.699090  | 0.000000 |
| 15               | 1                | 0              | -1.356491               | 3.101413  | 0.000000 |

---

**NPH**

Zero-point correction= 0.145946 (Hartree/Particle)

Thermal correction to Energy= 0.152816

Thermal correction to Enthalpy= 0.153760

Thermal correction to Gibbs Free Energy= 0.116005

**Electronic energy:**

B3LYP = -386.0731871

W1-F12 = -386.00216480

W2-F12 = -386.00298561

---

| Center<br>Number | Atomic<br>Number | Atomic<br>Type | Coordinates (Angstroms) |           |           |
|------------------|------------------|----------------|-------------------------|-----------|-----------|
|                  |                  |                | X                       | Y         | Z         |
| 1                | 6                | 0              | 0.000000                | 2.422511  | 0.705726  |
| 2                | 6                | 0              | 0.000000                | 1.239453  | 1.396737  |
| 3                | 6                | 0              | 0.000000                | 0.000000  | 0.713642  |
| 4                | 6                | 0              | 0.000000                | 0.000000  | -0.713642 |
| 5                | 6                | 0              | 0.000000                | 1.239453  | -1.396737 |
| 6                | 6                | 0              | 0.000000                | 2.422511  | -0.705726 |
| 7                | 1                | 0              | 0.000000                | -1.236812 | 2.479353  |
| 8                | 1                | 0              | 0.000000                | 3.362991  | 1.240009  |
| 9                | 1                | 0              | 0.000000                | 1.236812  | 2.479353  |
| 10               | 6                | 0              | 0.000000                | -1.239453 | 1.396737  |
| 11               | 6                | 0              | 0.000000                | -1.239453 | -1.396737 |
| 12               | 1                | 0              | 0.000000                | 1.236812  | -2.479353 |
| 13               | 1                | 0              | 0.000000                | 3.362991  | -1.240009 |
| 14               | 6                | 0              | 0.000000                | -2.422511 | -0.705726 |
| 15               | 6                | 0              | 0.000000                | -2.422511 | 0.705726  |
| 16               | 1                | 0              | 0.000000                | -1.236812 | -2.479353 |
| 17               | 1                | 0              | 0.000000                | -3.362991 | -1.240009 |
| 18               | 1                | 0              | 0.000000                | -3.362991 | 1.240009  |

---

**ADM**

Zero-point correction= 0.241082 (Hartree/Particle)  
Thermal correction to Energy= 0.248139  
Thermal correction to Enthalpy= 0.249083  
Thermal correction to Gibbs Free Energy= 0.212597

**Electronic energy:**

B3LYP = -390.9193707

W1-F12 = -390.85144214

W2-F12 = -390.85182455

---

| Center<br>Number | Atomic<br>Number | Atomic<br>Type | Coordinates (Angstroms) |           |           |
|------------------|------------------|----------------|-------------------------|-----------|-----------|
|                  |                  |                | X                       | Y         | Z         |
| 1                | 6                | 0              | 0.000000                | 0.000000  | 1.772083  |
| 2                | 1                | 0              | 0.621614                | 0.621614  | 2.422078  |
| 3                | 1                | 0              | -0.621614               | -0.621614 | 2.422078  |
| 4                | 6                | 0              | 0.888119                | -0.888119 | 0.888119  |
| 5                | 1                | 0              | 1.518891                | -1.518891 | 1.518891  |
| 6                | 6                | 0              | -0.888119               | 0.888119  | 0.888119  |
| 7                | 1                | 0              | -1.518891               | 1.518891  | 1.518891  |
| 8                | 6                | 0              | 0.000000                | 1.772083  | 0.000000  |
| 9                | 1                | 0              | 0.621614                | 2.422078  | 0.621614  |
| 10               | 1                | 0              | -0.621614               | 2.422078  | -0.621614 |
| 11               | 6                | 0              | 1.772083                | 0.000000  | 0.000000  |
| 12               | 1                | 0              | 2.422078                | -0.621614 | -0.621614 |
| 13               | 1                | 0              | 2.422078                | 0.621614  | 0.621614  |
| 14               | 6                | 0              | 0.888119                | 0.888119  | -0.888119 |
| 15               | 1                | 0              | 1.518891                | 1.518891  | -1.518891 |
| 16               | 6                | 0              | 0.000000                | 0.000000  | -1.772083 |
| 17               | 1                | 0              | -0.621614               | 0.621614  | -2.422078 |
| 18               | 1                | 0              | 0.621614                | -0.621614 | -2.422078 |
| 19               | 6                | 0              | 0.000000                | -1.772083 | 0.000000  |
| 20               | 1                | 0              | -0.621614               | -2.422078 | 0.621614  |

|    |   |   |           |           |           |
|----|---|---|-----------|-----------|-----------|
| 21 | 1 | 0 | 0.621614  | -2.422078 | -0.621614 |
| 22 | 6 | 0 | -1.772083 | 0.000000  | 0.000000  |
| 23 | 1 | 0 | -2.422078 | -0.621614 | 0.621614  |
| 24 | 1 | 0 | -2.422078 | 0.621614  | -0.621614 |
| 25 | 6 | 0 | -0.888119 | -0.888119 | -0.888119 |
| 26 | 1 | 0 | -1.518891 | -1.518891 | -1.518891 |

-----  
**ANT**

Zero-point correction= 0.192113 (Hartree/Particle)

Thermal correction to Energy= 0.201642

Thermal correction to Enthalpy= 0.202586

Thermal correction to Gibbs Free Energy= 0.158547

**Electronic energy:**

B3LYP = -539.7814526

W1-F12 = -539.68570002

W2-F12 = -539.68679622

-----

| Center<br>Number | Atomic<br>Number | Atomic<br>Type | Coordinates (Angstroms) |           |           |
|------------------|------------------|----------------|-------------------------|-----------|-----------|
|                  |                  |                | X                       | Y         | Z         |
| 1                | 6                | 0              | 0.000000                | 3.643606  | 0.710558  |
| 2                | 6                | 0              | 0.000000                | 2.468408  | 1.401217  |
| 3                | 6                | 0              | 0.000000                | 1.217729  | 0.719568  |
| 4                | 6                | 0              | 0.000000                | 1.217729  | -0.719568 |
| 5                | 6                | 0              | 0.000000                | 2.468408  | -1.401217 |
| 6                | 6                | 0              | 0.000000                | 3.643606  | -0.710558 |
| 7                | 6                | 0              | 0.000000                | 0.000000  | 1.398166  |
| 8                | 6                | 0              | 0.000000                | 0.000000  | -1.398166 |
| 9                | 6                | 0              | 0.000000                | -1.217729 | -0.719568 |
| 10               | 6                | 0              | 0.000000                | -1.217729 | 0.719568  |
| 11               | 6                | 0              | 0.000000                | -2.468408 | 1.401217  |
| 12               | 1                | 0              | 0.000000                | -2.466419 | 2.483718  |
| 13               | 6                | 0              | 0.000000                | -3.643606 | 0.710558  |

|    |   |   |          |           |           |
|----|---|---|----------|-----------|-----------|
| 14 | 6 | 0 | 0.000000 | -3.643606 | -0.710558 |
| 15 | 6 | 0 | 0.000000 | -2.468408 | -1.401217 |
| 16 | 1 | 0 | 0.000000 | 0.000000  | 2.481517  |
| 17 | 1 | 0 | 0.000000 | 4.585927  | 1.241494  |
| 18 | 1 | 0 | 0.000000 | 2.466419  | 2.483718  |
| 19 | 1 | 0 | 0.000000 | 2.466419  | -2.483718 |
| 20 | 1 | 0 | 0.000000 | 4.585927  | -1.241494 |
| 21 | 1 | 0 | 0.000000 | 0.000000  | -2.481517 |
| 22 | 1 | 0 | 0.000000 | -4.585927 | 1.241494  |
| 23 | 1 | 0 | 0.000000 | -4.585927 | -1.241494 |
| 24 | 1 | 0 | 0.000000 | -2.466419 | -2.483718 |

-----  
**tAB**

Zero-point correction= 0.188765 (Hartree/Particle)  
Thermal correction to Energy= 0.199755  
Thermal correction to Enthalpy= 0.200700  
Thermal correction to Gibbs Free Energy= 0.149455

**Electronic energy:**

B3LYP = -573.0244777  
W1-F12 = -572.94482100  
W2-F12 = -572.94604016

-----

| Center<br>Number | Atomic<br>Number | Atomic<br>Type | Coordinates (Angstroms) |          |          |
|------------------|------------------|----------------|-------------------------|----------|----------|
|                  |                  |                | X                       | Y        | Z        |
| 1                | 6                | 0              | -0.188045               | 4.519639 | 0.000000 |
| 2                | 6                | 0              | 1.099487                | 3.997333 | 0.000000 |
| 3                | 6                | 0              | 1.287357                | 2.622075 | 0.000000 |
| 4                | 6                | 0              | 0.188045                | 1.763973 | 0.000000 |
| 5                | 6                | 0              | -1.108601               | 2.290374 | 0.000000 |
| 6                | 6                | 0              | -1.288436               | 3.662265 | 0.000000 |
| 7                | 1                | 0              | -0.338348               | 5.590787 | 0.000000 |
| 8                | 1                | 0              | 1.954518                | 4.659436 | 0.000000 |

|    |   |   |           |           |          |
|----|---|---|-----------|-----------|----------|
| 9  | 1 | 0 | 2.277557  | 2.188081  | 0.000000 |
| 10 | 1 | 0 | -1.949395 | 1.613471  | 0.000000 |
| 11 | 1 | 0 | -2.289549 | 4.072379  | 0.000000 |
| 12 | 7 | 0 | 0.492373  | 0.383116  | 0.000000 |
| 13 | 7 | 0 | -0.492373 | -0.383116 | 0.000000 |
| 14 | 6 | 0 | -0.188045 | -1.763973 | 0.000000 |
| 15 | 6 | 0 | 1.108601  | -2.290374 | 0.000000 |
| 16 | 6 | 0 | -1.287357 | -2.622075 | 0.000000 |
| 17 | 6 | 0 | 1.288436  | -3.662265 | 0.000000 |
| 18 | 1 | 0 | 1.949395  | -1.613471 | 0.000000 |
| 19 | 6 | 0 | -1.099487 | -3.997333 | 0.000000 |
| 20 | 1 | 0 | -2.277557 | -2.188081 | 0.000000 |
| 21 | 6 | 0 | 0.188045  | -4.519639 | 0.000000 |
| 22 | 1 | 0 | 2.289549  | -4.072379 | 0.000000 |
| 23 | 1 | 0 | -1.954518 | -4.659436 | 0.000000 |
| 24 | 1 | 0 | 0.338348  | -5.590787 | 0.000000 |

---

### HPX

Zero-point correction= 0.099172 (Hartree/Particle)  
 Thermal correction to Energy= 0.105944  
 Thermal correction to Enthalpy= 0.106888  
 Thermal correction to Gibbs Free Energy= 0.067727

### Electronic energy:

B3LYP = -487.4084128  
 W1-F12 = -487.40981432  
 W2-F12 = -487.41148885

---

| Center<br>Number | Atomic<br>Number | Atomic<br>Type | Coordinates (Angstroms) |           |          |
|------------------|------------------|----------------|-------------------------|-----------|----------|
|                  |                  |                | X                       | Y         | Z        |
| 1                | 7                | 0              | 1.640451                | -1.042847 | 0.000000 |
| 2                | 6                | 0              | 0.000000                | 0.622157  | 0.000000 |
| 3                | 6                | 0              | -0.878734               | -0.456292 | 0.000000 |

|    |   |   |           |           |          |
|----|---|---|-----------|-----------|----------|
| 4  | 7 | 0 | -0.589942 | -1.781682 | 0.000000 |
| 5  | 8 | 0 | 2.358831  | 1.131919  | 0.000000 |
| 6  | 7 | 0 | -0.692923 | 1.810337  | 0.000000 |
| 7  | 7 | 0 | -2.127451 | 0.100479  | 0.000000 |
| 8  | 6 | 0 | 1.418430  | 0.369400  | 0.000000 |
| 9  | 6 | 0 | 0.686559  | -2.010858 | 0.000000 |
| 10 | 1 | 0 | 1.046714  | -3.031955 | 0.000000 |
| 11 | 1 | 0 | 2.614185  | -1.309535 | 0.000000 |
| 12 | 1 | 0 | -2.994926 | -0.408410 | 0.000000 |
| 13 | 6 | 0 | -1.952762 | 1.466326  | 0.000000 |
| 14 | 1 | 0 | -2.788530 | 2.146137  | 0.000000 |

---

**TPL**

Zero-point correction= 0.158870 (Hartree/Particle)  
 Thermal correction to Energy= 0.170354  
 Thermal correction to Enthalpy= 0.171298  
 Thermal correction to Gibbs Free Energy= 0.120662

**Electronic energy:**

B3LYP = -641.360894  
 W1-F12 = -641.36135072  
 W2-F12 = -641.36403980

---

| Center<br>Number | Atomic<br>Number | Atomic<br>Type | Coordinates (Angstroms) |           |          |
|------------------|------------------|----------------|-------------------------|-----------|----------|
|                  |                  |                | X                       | Y         | Z        |
| 1                | 7                | 0              | -0.743402               | -1.470007 | 0.000000 |
| 2                | 6                | 0              | 0.000000                | 0.767858  | 0.000000 |
| 3                | 6                | 0              | 1.299940                | 0.319032  | 0.000000 |
| 4                | 7                | 0              | 1.570884                | -1.020167 | 0.000000 |
| 5                | 8                | 0              | -2.304841               | 0.213648  | 0.000000 |
| 6                | 7                | 0              | 0.098107                | 2.148904  | 0.000000 |
| 7                | 7                | 0              | 2.187231                | 1.340135  | 0.000000 |
| 8                | 6                | 0              | -1.128258               | -0.109604 | 0.000000 |

|    |   |   |           |           |           |
|----|---|---|-----------|-----------|-----------|
| 9  | 6 | 0 | 0.567490  | -1.971568 | 0.000000  |
| 10 | 6 | 0 | 1.421896  | 2.426366  | 0.000000  |
| 11 | 1 | 0 | 1.789933  | 3.438933  | 0.000000  |
| 12 | 8 | 0 | 0.822990  | -3.158466 | 0.000000  |
| 13 | 6 | 0 | -1.837431 | -2.441283 | 0.000000  |
| 14 | 1 | 0 | -2.457881 | -2.296362 | 0.881736  |
| 15 | 1 | 0 | -2.457881 | -2.296362 | -0.881736 |
| 16 | 1 | 0 | -1.402810 | -3.433043 | 0.000000  |
| 17 | 1 | 0 | 2.516923  | -1.364457 | 0.000000  |
| 18 | 6 | 0 | -1.004178 | 3.095083  | 0.000000  |
| 19 | 1 | 0 | -1.623278 | 2.950410  | -0.882273 |
| 20 | 1 | 0 | -1.623278 | 2.950410  | 0.882273  |
| 21 | 1 | 0 | -0.593416 | 4.101655  | 0.000000  |

-----  
**4-NPA**

Zero-point correction= 0.105076 (Hartree/Particle)  
Thermal correction to Energy= 0.114593  
Thermal correction to Enthalpy= 0.115537  
Thermal correction to Gibbs Free Energy= 0.068828

**Electronic energy:**

B3LYP = -600.61401  
W1-F12 = -600.61748790

-----

| Center<br>Number | Atomic<br>Number | Atomic<br>Type | Coordinates (Angstroms) |          |          |
|------------------|------------------|----------------|-------------------------|----------|----------|
|                  |                  |                | X                       | Y        | Z        |
| 1                | 6                | 0              | 1.142698                | 0.416970 | 0.000000 |
| 2                | 1                | 0              | 2.113959                | 0.891997 | 0.000000 |
| 3                | 6                | 0              | 0.000000                | 1.195969 | 0.000000 |
| 4                | 6                | 0              | -1.242007               | 0.576780 | 0.000000 |
| 5                | 7                | 0              | -2.453102               | 1.404803 | 0.000000 |
| 6                | 8                | 0              | -3.532193               | 0.831414 | 0.000000 |
| 7                | 8                | 0              | -2.310989               | 2.618686 | 0.000000 |



|    |   |   |           |           |          |
|----|---|---|-----------|-----------|----------|
| 8  | 6 | 0 | 1.033775  | -0.977281 | 0.000000 |
| 9  | 6 | 0 | -0.224493 | -1.584483 | 0.000000 |
| 10 | 6 | 0 | -1.366158 | -0.806907 | 0.000000 |
| 11 | 1 | 0 | -0.286520 | -2.662638 | 0.000000 |
| 12 | 1 | 0 | -2.348295 | -1.252396 | 0.000000 |
| 13 | 1 | 0 | 0.056934  | 2.273011  | 0.000000 |
| 14 | 7 | 0 | 2.140864  | -1.845463 | 0.000000 |
| 15 | 7 | 0 | 3.270338  | -1.353768 | 0.000000 |
| 16 | 7 | 0 | 4.348541  | -1.030867 | 0.000000 |

---

**24-DNT**

Zero-point correction= 0.131766 (Hartree/Particle)  
 Thermal correction to Energy= 0.142772  
 Thermal correction to Enthalpy= 0.143716  
 Thermal correction to Gibbs Free Energy= 0.093613

**Electronic energy:**

B3LYP = -680.8787573

W1-F12 = -680.90415550

---

| Center<br>Number | Atomic<br>Number | Atomic<br>Type | Coordinates (Angstroms) |           |           |
|------------------|------------------|----------------|-------------------------|-----------|-----------|
|                  |                  |                | X                       | Y         | Z         |
| 1                | 6                | 0              | -1.212544               | 1.197388  | -0.047244 |
| 2                | 6                | 0              | -0.954979               | -0.179976 | -0.008104 |
| 3                | 6                | 0              | 0.326751                | -0.705559 | 0.006674  |
| 4                | 6                | 0              | 1.392823                | 0.171093  | 0.008027  |
| 5                | 6                | 0              | 1.201858                | 1.543634  | -0.031483 |
| 6                | 6                | 0              | -0.091407               | 2.034070  | -0.068239 |
| 7                | 1                | 0              | 0.484668                | -1.771208 | 0.018006  |
| 8                | 1                | 0              | 2.056388                | 2.201849  | -0.038065 |
| 9                | 7                | 0              | -2.053970               | -1.166154 | 0.014449  |
| 10               | 8                | 0              | -1.827541               | -2.266537 | -0.458795 |
| 11               | 8                | 0              | -3.113071               | -0.824855 | 0.516373  |

|    |   |   |           |           |           |
|----|---|---|-----------|-----------|-----------|
| 12 | 7 | 0 | 2.763127  | -0.369913 | 0.045628  |
| 13 | 8 | 0 | 3.682083  | 0.432829  | 0.025196  |
| 14 | 8 | 0 | 2.890043  | -1.581392 | 0.095016  |
| 15 | 6 | 0 | -2.580222 | 1.811770  | -0.093883 |
| 16 | 1 | 0 | -3.221392 | 1.321264  | -0.823994 |
| 17 | 1 | 0 | -3.081007 | 1.716170  | 0.868485  |
| 18 | 1 | 0 | -2.500143 | 2.867008  | -0.346671 |
| 19 | 1 | 0 | -0.248424 | 3.102503  | -0.115108 |

-----  
**DNAN**

Zero-point correction= 0.136384 (Hartree/Particle)  
Thermal correction to Energy= 0.148525  
Thermal correction to Enthalpy= 0.149469  
Thermal correction to Gibbs Free Energy= 0.096586

**Electronic energy:**

B3LYP = -756.1147135

W1-F12 = -756.15671416

-----

| Center<br>Number | Atomic<br>Number | Atomic<br>Type | Coordinates (Angstroms) |           |           |
|------------------|------------------|----------------|-------------------------|-----------|-----------|
|                  |                  |                | X                       | Y         | Z         |
| 1                | 6                | 0              | 1.168803                | -0.733395 | -0.018556 |
| 2                | 6                | 0              | 0.651856                | 0.577607  | 0.000172  |
| 3                | 6                | 0              | -0.704721               | 0.822812  | -0.003680 |
| 4                | 6                | 0              | -1.576140               | -0.252772 | 0.015682  |
| 5                | 6                | 0              | -1.107504               | -1.557750 | 0.012733  |
| 6                | 6                | 0              | 0.254583                | -1.795033 | -0.012978 |
| 7                | 1                | 0              | -1.075943               | 1.834850  | -0.016634 |
| 8                | 1                | 0              | -1.812981               | -2.373740 | 0.023970  |
| 9                | 7                | 0              | 1.545176                | 1.746925  | 0.029532  |
| 10               | 8                | 0              | 1.211177                | 2.709582  | -0.642959 |
| 11               | 8                | 0              | 2.531033                | 1.687547  | 0.740596  |
| 12               | 7                | 0              | -3.020675               | -0.002499 | 0.036182  |

|    |   |   |           |           |           |
|----|---|---|-----------|-----------|-----------|
| 13 | 8 | 0 | -3.760569 | -0.974943 | 0.039263  |
| 14 | 8 | 0 | -3.393497 | 1.159703  | 0.048894  |
| 15 | 1 | 0 | 0.611095  | -2.811938 | -0.033025 |
| 16 | 8 | 0 | 2.491744  | -0.887926 | -0.082375 |
| 17 | 6 | 0 | 3.041241  | -2.202387 | -0.131646 |
| 18 | 1 | 0 | 4.116261  | -2.063499 | -0.176143 |
| 19 | 1 | 0 | 2.781127  | -2.766984 | 0.764851  |
| 20 | 1 | 0 | 2.701110  | -2.735859 | -1.020738 |

-----  
**TNT**

Zero-point correction= 0.133802 (Hartree/Particle)  
Thermal correction to Energy= 0.147509  
Thermal correction to Enthalpy= 0.148453  
Thermal correction to Gibbs Free Energy= 0.091568

**Electronic energy:**

B3LYP = -885.4577427  
W1-F12 = -885.52480482

-----

| Center<br>Number | Atomic<br>Number | Atomic<br>Type | Coordinates (Angstroms) |           |           |
|------------------|------------------|----------------|-------------------------|-----------|-----------|
|                  |                  |                | X                       | Y         | Z         |
| 1                | 6                | 0              | -0.054344               | -1.266422 | 0.000000  |
| 2                | 6                | 0              | -0.025558               | -0.505740 | -1.176724 |
| 3                | 6                | 0              | 0.011003                | 0.876507  | -1.204430 |
| 4                | 6                | 0              | 0.042931                | 1.551012  | 0.000000  |
| 5                | 6                | 0              | 0.011003                | 0.876507  | 1.204430  |
| 6                | 6                | 0              | -0.025558               | -0.505740 | 1.176724  |
| 7                | 1                | 0              | 0.012558                | 1.412350  | -2.139870 |
| 8                | 1                | 0              | 0.012558                | 1.412350  | 2.139870  |
| 9                | 7                | 0              | -0.023114               | -1.169259 | -2.498563 |
| 10               | 8                | 0              | -0.693026               | -0.653885 | -3.375266 |
| 11               | 8                | 0              | 0.667986                | -2.164950 | -2.622937 |
| 12               | 7                | 0              | -0.023114               | -1.169259 | 2.498563  |

|    |   |   |           |           |           |
|----|---|---|-----------|-----------|-----------|
| 13 | 8 | 0 | -0.693026 | -0.653885 | 3.375266  |
| 14 | 8 | 0 | 0.667986  | -2.164950 | 2.622937  |
| 15 | 7 | 0 | 0.102694  | 3.026042  | 0.000000  |
| 16 | 8 | 0 | 0.125293  | 3.581568  | 1.083737  |
| 17 | 8 | 0 | 0.125293  | 3.581568  | -1.083737 |
| 18 | 6 | 0 | -0.189987 | -2.760432 | 0.000000  |
| 19 | 1 | 0 | -0.717121 | -3.102623 | -0.884928 |
| 20 | 1 | 0 | 0.792877  | -3.229993 | 0.000000  |
| 21 | 1 | 0 | -0.717121 | -3.102623 | 0.884928  |

-----  
**Tetryl**

Zero-point correction= 0.152519 (Hartree/Particle)  
Thermal correction to Energy= 0.170022  
Thermal correction to Enthalpy= 0.170966  
Thermal correction to Gibbs Free Energy= 0.105005

**Electronic energy:**

B3LYP = -1145.3921458  
W1-F12 = -1145.49793952

-----

| Center<br>Number | Atomic<br>Number | Atomic<br>Type | Coordinates (Angstroms) |           |           |
|------------------|------------------|----------------|-------------------------|-----------|-----------|
|                  |                  |                | X                       | Y         | Z         |
| 1                | 6                | 0              | -0.508001               | 0.130517  | 0.139397  |
| 2                | 6                | 0              | 0.125499                | -1.120284 | 0.171903  |
| 3                | 6                | 0              | 1.493345                | -1.260192 | 0.057015  |
| 4                | 6                | 0              | 2.268642                | -0.117083 | -0.024657 |
| 5                | 6                | 0              | 1.709521                | 1.144991  | -0.019888 |
| 6                | 6                | 0              | 0.331134                | 1.245047  | 0.027735  |
| 7                | 1                | 0              | 1.946470                | -2.238608 | 0.055825  |
| 8                | 1                | 0              | 2.327388                | 2.026813  | -0.077795 |
| 9                | 7                | 0              | -0.644016               | -2.365988 | 0.389758  |
| 10               | 8                | 0              | -0.243854               | -3.360380 | -0.178135 |
| 11               | 8                | 0              | -1.588061               | -2.307121 | 1.157749  |

|    |   |   |           |           |           |
|----|---|---|-----------|-----------|-----------|
| 12 | 7 | 0 | -0.231526 | 2.609417  | -0.080432 |
| 13 | 8 | 0 | -1.197454 | 2.763699  | -0.802787 |
| 14 | 8 | 0 | 0.340228  | 3.480968  | 0.549087  |
| 15 | 7 | 0 | 3.738014  | -0.250184 | -0.112946 |
| 16 | 8 | 0 | 4.384127  | 0.779484  | -0.184409 |
| 17 | 8 | 0 | 4.193471  | -1.378959 | -0.106586 |
| 18 | 7 | 0 | -1.892475 | 0.289310  | 0.251947  |
| 19 | 7 | 0 | -2.708080 | -0.338530 | -0.676532 |
| 20 | 8 | 0 | -2.151593 | -0.969937 | -1.559442 |
| 21 | 8 | 0 | -3.900582 | -0.184509 | -0.522732 |
| 22 | 6 | 0 | -2.541059 | 1.037878  | 1.318875  |
| 23 | 1 | 0 | -1.762537 | 1.404402  | 1.982261  |
| 24 | 1 | 0 | -3.109372 | 1.872487  | 0.916655  |
| 25 | 1 | 0 | -3.200112 | 0.375528  | 1.876262  |

-----  
**FOX-7**

Zero-point correction= 0.091023 (Hartree/Particle)  
Thermal correction to Energy= 0.100337  
Thermal correction to Enthalpy= 0.101282  
Thermal correction to Gibbs Free Energy= 0.056861

**Electronic energy:**

B3LYP = -598.6044501  
W1-F12 = -598.66029515  
W2-F12 = -598.66334834

-----

| Center<br>Number | Atomic<br>Number | Atomic<br>Type | Coordinates (Angstroms) |          |           |
|------------------|------------------|----------------|-------------------------|----------|-----------|
|                  |                  |                | X                       | Y        | Z         |
| 1                | 6                | 0              | 0.000000                | 0.000000 | 1.368590  |
| 2                | 6                | 0              | 0.000000                | 0.000000 | -0.050505 |
| 3                | 7                | 0              | 0.231326                | 1.195182 | -0.801368 |
| 4                | 8                | 0              | 0.682014                | 1.115405 | -1.925912 |

-----

|    |   |   |           |           |           |
|----|---|---|-----------|-----------|-----------|
| 5  | 8 | 0 | 0.000000  | 2.286983  | -0.244575 |
| 6  | 7 | 0 | -0.231326 | -1.195182 | -0.801368 |
| 7  | 8 | 0 | -0.682014 | -1.115405 | -1.925912 |
| 8  | 8 | 0 | 0.000000  | -2.286983 | -0.244575 |
| 9  | 7 | 0 | -0.034495 | 1.143654  | 2.063831  |
| 10 | 1 | 0 | 0.186501  | 1.140479  | 3.042979  |
| 11 | 1 | 0 | -0.064691 | 2.003541  | 1.529422  |
| 12 | 7 | 0 | 0.034495  | -1.143654 | 2.063831  |
| 13 | 1 | 0 | -0.186501 | -1.140479 | 3.042979  |
| 14 | 1 | 0 | 0.064691  | -2.003541 | 1.529422  |

-----  
**TNAA**

Zero-point correction= 0.080971 (Hartree/Particle)  
Thermal correction to Energy= 0.095214  
Thermal correction to Enthalpy= 0.096158  
Thermal correction to Gibbs Free Energy= 0.037432

**Electronic energy:**

B3LYP = -1027.5733512

W1-F12 = -1027.73720234

-----

| Center<br>Number | Atomic<br>Number | Atomic<br>Type | Coordinates (Angstroms) |           |           |
|------------------|------------------|----------------|-------------------------|-----------|-----------|
|                  |                  |                | X                       | Y         | Z         |
| 1                | 6                | 0              | 0.709575                | -0.413988 | 0.064722  |
| 2                | 6                | 0              | -0.751136               | 0.000188  | 0.001913  |
| 3                | 7                | 0              | -0.921456               | 1.490130  | -0.392216 |
| 4                | 8                | 0              | -1.259127               | 1.723819  | -1.522665 |
| 5                | 8                | 0              | -0.689885               | 2.258637  | 0.505552  |
| 6                | 7                | 0              | -1.441873               | -0.890968 | -1.059042 |
| 7                | 8                | 0              | -2.505693               | -1.380074 | -0.785771 |
| 8                | 8                | 0              | -0.799479               | -0.997205 | -2.076717 |
| 9                | 7                | 0              | 1.574278                | 0.535477  | -0.034190 |
| 10               | 7                | 0              | -1.458549               | -0.146602 | 1.363338  |

|    |   |   |           |           |           |
|----|---|---|-----------|-----------|-----------|
| 11 | 8 | 0 | -2.577786 | 0.293273  | 1.412048  |
| 12 | 8 | 0 | -0.816724 | -0.676957 | 2.240012  |
| 13 | 7 | 0 | 2.941791  | 0.156569  | 0.009930  |
| 14 | 8 | 0 | 3.254022  | -1.037984 | 0.170943  |
| 15 | 8 | 0 | 3.721817  | 1.052973  | -0.114641 |
| 16 | 8 | 0 | 0.864678  | -1.697593 | 0.190940  |
| 17 | 1 | 0 | 1.855456  | -1.840564 | 0.227837  |

-----  
**FEFO**

Zero-point correction= 0.161405 (Hartree/Particle)  
Thermal correction to Energy= 0.182030  
Thermal correction to Enthalpy= 0.182974  
Thermal correction to Gibbs Free Energy= 0.105651

**Electronic energy:**

B3LYP = -1365.1863583

-----

| Center<br>Number | Atomic<br>Number | Atomic<br>Type | Coordinates (Angstroms) |           |           |
|------------------|------------------|----------------|-------------------------|-----------|-----------|
|                  |                  |                | X                       | Y         | Z         |
| 1                | 6                | 0              | -1.800938               | 0.115872  | 0.605309  |
| 2                | 1                | 0              | -2.061570               | 0.264751  | 1.649012  |
| 3                | 1                | 0              | -1.148655               | 0.929032  | 0.288224  |
| 4                | 6                | 0              | -3.070723               | 0.148123  | -0.232332 |
| 5                | 7                | 0              | -3.884071               | 1.451176  | -0.033881 |
| 6                | 8                | 0              | -3.435043               | 2.256128  | 0.752735  |
| 7                | 8                | 0              | -4.881316               | 1.547902  | -0.708237 |
| 8                | 7                | 0              | -4.026252               | -0.996774 | 0.185694  |
| 9                | 8                | 0              | -4.446637               | -0.903527 | 1.319858  |
| 10               | 8                | 0              | -4.239388               | -1.860476 | -0.623695 |
| 11               | 9                | 0              | -2.831946               | 0.037019  | -1.540189 |
| 12               | 6                | 0              | 2.068989                | -0.527747 | -0.800153 |
| 13               | 1                | 0              | 1.845280                | -0.080065 | -1.774297 |
| 14               | 1                | 0              | 2.464952                | -1.532899 | -0.957071 |

|    |   |   |           |           |           |
|----|---|---|-----------|-----------|-----------|
| 15 | 6 | 0 | 3.129396  | 0.319258  | -0.128908 |
| 16 | 9 | 0 | 2.767365  | 1.588524  | 0.017427  |
| 17 | 7 | 0 | 3.483177  | -0.258128 | 1.267770  |
| 18 | 8 | 0 | 3.939660  | -1.382719 | 1.236857  |
| 19 | 8 | 0 | 3.268129  | 0.437310  | 2.223192  |
| 20 | 7 | 0 | 4.464028  | 0.315970  | -0.918107 |
| 21 | 8 | 0 | 5.341565  | 1.000011  | -0.450013 |
| 22 | 8 | 0 | 4.495937  | -0.345414 | -1.933439 |
| 23 | 8 | 0 | -1.189837 | -1.153989 | 0.478510  |
| 24 | 8 | 0 | 0.957668  | -0.519119 | 0.062240  |
| 25 | 6 | 0 | -0.148992 | -1.257469 | -0.435670 |
| 26 | 1 | 0 | -0.423853 | -0.873266 | -1.426206 |
| 27 | 1 | 0 | 0.094595  | -2.320231 | -0.498670 |

-----  
**NIGU**

Zero-point correction= 0.077186 (Hartree/Particle)  
Thermal correction to Energy= 0.084022  
Thermal correction to Enthalpy= 0.084966  
Thermal correction to Gibbs Free Energy= 0.046044

**Electronic energy:**

B3LYP = -410.0606893  
W1-F12 = -410.09054736  
W2-F12 = -410.09238290

-----

| Center<br>Number | Atomic<br>Number | Atomic<br>Type | Coordinates (Angstroms) |           |           |
|------------------|------------------|----------------|-------------------------|-----------|-----------|
|                  |                  |                | X                       | Y         | Z         |
| 1                | 6                | 0              | 1.065026                | -0.078484 | 0.005637  |
| 2                | 7                | 0              | 1.232293                | 1.250750  | 0.022966  |
| 3                | 1                | 0              | 2.120519                | 1.649210  | -0.221493 |
| 4                | 1                | 0              | 0.379940                | 1.795839  | -0.010786 |
| 5                | 7                | 0              | 2.185736                | -0.848440 | -0.071131 |
| 6                | 1                | 0              | 3.051111                | -0.482619 | 0.285830  |



|    |   |   |           |           |           |
|----|---|---|-----------|-----------|-----------|
| 7  | 1 | 0 | 2.030346  | -1.834947 | 0.052841  |
| 8  | 7 | 0 | -0.062624 | -0.769748 | 0.046336  |
| 9  | 7 | 0 | -1.263902 | -0.102441 | 0.003228  |
| 10 | 8 | 0 | -1.329542 | 1.142259  | 0.008227  |
| 11 | 8 | 0 | -2.247032 | -0.813186 | -0.026978 |

-----  
**DNDAP**

Zero-point correction= 0.141881 (Hartree/Particle)  
Thermal correction to Energy= 0.153517  
Thermal correction to Enthalpy= 0.154462  
Thermal correction to Gibbs Free Energy= 0.102282

**Electronic energy:**

B3LYP = -639.1058288  
W1-F12 = -639.14978242  
W2-F12 = -639.15318517

-----

| Center<br>Number | Atomic<br>Number | Atomic<br>Type | Coordinates (Angstroms) |           |           |
|------------------|------------------|----------------|-------------------------|-----------|-----------|
|                  |                  |                | X                       | Y         | Z         |
| 1                | 6                | 0              | -1.179420               | 2.036933  | 0.112451  |
| 2                | 1                | 0              | -1.430566               | 2.024623  | -0.946800 |
| 3                | 1                | 0              | -1.999429               | 1.601932  | 0.672153  |
| 4                | 1                | 0              | -1.008665               | 3.065422  | 0.423431  |
| 5                | 6                | 0              | 0.000000                | 0.000000  | 1.147736  |
| 6                | 1                | 0              | 0.887765                | -0.029486 | 1.770292  |
| 7                | 1                | 0              | -0.887765               | 0.029486  | 1.770292  |
| 8                | 6                | 0              | 1.179420                | -2.036933 | 0.112451  |
| 9                | 1                | 0              | 1.008665                | -3.065422 | 0.423431  |
| 10               | 1                | 0              | 1.430566                | -2.024623 | -0.946800 |
| 11               | 1                | 0              | 1.999429                | -1.601932 | 0.672153  |
| 12               | 7                | 0              | 0.000000                | -1.226438 | 0.377894  |
| 13               | 7                | 0              | 0.000000                | 1.226438  | 0.377894  |
| 14               | 7                | 0              | 1.171794                | 1.605948  | -0.212268 |

|    |   |   |           |           |           |
|----|---|---|-----------|-----------|-----------|
| 15 | 8 | 0 | 1.149390  | 2.627371  | -0.879017 |
| 16 | 8 | 0 | 2.152744  | 0.891764  | -0.020530 |
| 17 | 7 | 0 | -1.171794 | -1.605948 | -0.212268 |
| 18 | 8 | 0 | -2.152744 | -0.891764 | -0.020530 |
| 19 | 8 | 0 | -1.149390 | -2.627371 | -0.879017 |

-----  
**DNPP**

Zero-point correction= 0.150196 (Hartree/Particle)  
Thermal correction to Energy= 0.161011  
Thermal correction to Enthalpy= 0.161956  
Thermal correction to Gibbs Free Energy= 0.111574

**Electronic energy:**

B3LYP = -677.1899974  
W1-F12 = -677.26748870

-----  

| Center<br>Number | Atomic<br>Number | Atomic<br>Type | Coordinates (Angstroms) |           |           |
|------------------|------------------|----------------|-------------------------|-----------|-----------|
|                  |                  |                | X                       | Y         | Z         |
| 1                | 6                | 0              | 0.411377                | 0.641762  | -1.183272 |
| 2                | 1                | 0              | 0.131996                | 1.262158  | -2.030081 |
| 3                | 1                | 0              | 1.476278                | 0.415002  | -1.276657 |
| 4                | 6                | 0              | 0.268441                | -0.712233 | 1.257189  |
| 5                | 1                | 0              | 1.359566                | -0.715687 | 1.335777  |
| 6                | 1                | 0              | -0.122217               | -1.242000 | 2.122076  |
| 7                | 6                | 0              | -0.411377               | -0.641762 | -1.183272 |
| 8                | 1                | 0              | -0.131996               | -1.262158 | -2.030081 |
| 9                | 1                | 0              | -1.476278               | -0.415002 | -1.276657 |
| 10               | 6                | 0              | -0.268441               | 0.712233  | 1.257189  |
| 11               | 1                | 0              | -1.359566               | 0.715687  | 1.335777  |
| 12               | 1                | 0              | 0.122217                | 1.242000  | 2.122076  |
| 13               | 7                | 0              | -0.164517               | -1.394407 | 0.043149  |
| 14               | 7                | 0              | 0.164517                | 1.394407  | 0.043149  |
| 15               | 7                | 0              | -0.001861               | 2.750607  | -0.024938 |

|    |   |   |           |           |           |
|----|---|---|-----------|-----------|-----------|
| 16 | 7 | 0 | 0.001861  | -2.750607 | -0.024938 |
| 17 | 8 | 0 | -0.411377 | 3.303114  | 0.987944  |
| 18 | 8 | 0 | 0.288838  | 3.301539  | -1.078205 |
| 19 | 8 | 0 | 0.411377  | -3.303114 | 0.987944  |
| 20 | 8 | 0 | -0.288838 | -3.301539 | -1.078205 |

-----  
**RDX (aaa conformer)**

Zero-point correction= 0.141019 (Hartree/Particle)  
Thermal correction to Energy= 0.153647  
Thermal correction to Enthalpy= 0.154592  
Thermal correction to Gibbs Free Energy= 0.100581

**Electronic energy:**

B3LYP = -897.8299788  
W1-F12 = -897.92329127  
DLPNO-CCSD(T) = -896.4187140

-----

| Center<br>Number | Atomic<br>Number | Atomic<br>Type | Coordinates (Angstroms) |           |           |
|------------------|------------------|----------------|-------------------------|-----------|-----------|
|                  |                  |                | X                       | Y         | Z         |
| 1                | 7                | 0              | 0.000000                | 1.395192  | 0.808607  |
| 2                | 7                | 0              | -1.208272               | -0.697596 | 0.808607  |
| 3                | 7                | 0              | 1.208272                | -0.697596 | 0.808607  |
| 4                | 6                | 0              | -1.230375               | 0.710358  | 1.172863  |
| 5                | 6                | 0              | 0.000000                | -1.420715 | 1.172863  |
| 6                | 6                | 0              | 1.230375                | 0.710358  | 1.172863  |
| 7                | 1                | 0              | 2.074543                | 1.197738  | 0.705339  |
| 8                | 1                | 0              | 1.322862                | 0.763755  | 2.257673  |
| 9                | 1                | 0              | -2.074543               | 1.197738  | 0.705339  |
| 10               | 1                | 0              | 0.000000                | -2.395475 | 0.705339  |
| 11               | 1                | 0              | 0.000000                | -1.527510 | 2.257673  |
| 12               | 1                | 0              | -1.322862               | 0.763755  | 2.257673  |
| 13               | 7                | 0              | 0.000000                | 2.165907  | -0.379262 |
| 14               | 8                | 0              | -1.085081               | 2.489469  | -0.812850 |

|    |   |   |           |           |           |
|----|---|---|-----------|-----------|-----------|
| 15 | 8 | 0 | 1.085081  | 2.489469  | -0.812850 |
| 16 | 7 | 0 | -1.875731 | -1.082954 | -0.379262 |
| 17 | 8 | 0 | -2.698484 | -0.305027 | -0.812850 |
| 18 | 8 | 0 | -1.613403 | -2.184443 | -0.812850 |
| 19 | 7 | 0 | 1.875731  | -1.082954 | -0.379262 |
| 20 | 8 | 0 | 2.698484  | -0.305027 | -0.812850 |
| 21 | 8 | 0 | 1.613403  | -2.184443 | -0.812850 |

-----  
**RDX (aae conformer)**

Zero-point correction= 0.142593 (Hartree/Particle)

Thermal correction to Energy= 0.155143

Thermal correction to Enthalpy= 0.156087

Thermal correction to Gibbs Free Energy= 0.101490

**Electronic energy:**

B3LYP = -897.8303348

DLPNO-CCSD(T) = -896.41998406

-----

| Center<br>Number | Atomic<br>Number | Atomic<br>Type | Coordinates (Angstroms) |           |           |
|------------------|------------------|----------------|-------------------------|-----------|-----------|
|                  |                  |                | X                       | Y         | Z         |
| 1                | 7                | 0              | 0.132221                | 1.253084  | 0.000000  |
| 2                | 7                | 0              | 0.785558                | -0.678259 | 1.209726  |
| 3                | 7                | 0              | 0.785558                | -0.678259 | -1.209726 |
| 4                | 6                | 0              | 0.756006                | 0.764681  | 1.234562  |
| 5                | 6                | 0              | 1.342066                | -1.269770 | 0.000000  |
| 6                | 6                | 0              | 0.756006                | 0.764681  | -1.234562 |
| 7                | 1                | 0              | 0.193586                | 1.113846  | -2.087198 |
| 8                | 1                | 0              | 1.791644                | 1.112402  | -1.306771 |
| 9                | 1                | 0              | 0.193586                | 1.113846  | 2.087198  |
| 10               | 1                | 0              | 1.172724                | -2.337162 | 0.000000  |
| 11               | 1                | 0              | 2.410891                | -1.061807 | 0.000000  |
| 12               | 1                | 0              | 1.791644                | 1.112402  | 1.306771  |
| 13               | 7                | 0              | -0.242253               | 2.598729  | 0.000000  |

|    |   |   |           |           |           |
|----|---|---|-----------|-----------|-----------|
| 14 | 8 | 0 | -0.403105 | 3.119892  | 1.087152  |
| 15 | 8 | 0 | -0.403105 | 3.119892  | -1.087152 |
| 16 | 7 | 0 | -0.337703 | -1.341019 | 1.786411  |
| 17 | 8 | 0 | -1.055792 | -0.673684 | 2.498829  |
| 18 | 8 | 0 | -0.427245 | -2.527701 | 1.565443  |
| 19 | 7 | 0 | -0.337703 | -1.341019 | -1.786411 |
| 20 | 8 | 0 | -1.055792 | -0.673684 | -2.498829 |
| 21 | 8 | 0 | -0.427245 | -2.527701 | -1.565443 |

-----  
**HMX (crown conformer)**

Zero-point correction= 0.190912 (Hartree/Particle)  
Thermal correction to Energy= 0.208261  
Thermal correction to Enthalpy= 0.209205  
Thermal correction to Gibbs Free Energy= 0.144153

**Electronic energy:**

B3LYP = -1197.1084085  
W1-F12 = -1197.23049313  
DLPNO-CCSD(T) = -1195.2254780

-----

| Center<br>Number | Atomic<br>Number | Atomic<br>Type | Coordinates (Angstroms) |           |           |
|------------------|------------------|----------------|-------------------------|-----------|-----------|
|                  |                  |                | X                       | Y         | Z         |
| 1                | 6                | 0              | 1.262117                | 1.278449  | -1.065014 |
| 2                | 1                | 0              | 1.282494                | 1.093693  | -2.140853 |
| 3                | 1                | 0              | 2.043149                | 1.981299  | -0.803123 |
| 4                | 6                | 0              | -1.262117               | -1.278449 | -1.065014 |
| 5                | 1                | 0              | -2.043149               | -1.981299 | -0.803123 |
| 6                | 1                | 0              | -1.282494               | -1.093693 | -2.140853 |
| 7                | 6                | 0              | 1.262117                | -1.278449 | -1.065014 |
| 8                | 1                | 0              | 2.043149                | -1.981299 | -0.803123 |
| 9                | 1                | 0              | 1.282494                | -1.093693 | -2.140853 |
| 10               | 6                | 0              | -1.262117               | 1.278449  | -1.065014 |
| 11               | 1                | 0              | -1.282494               | 1.093693  | -2.140853 |

|    |   |   |           |           |           |
|----|---|---|-----------|-----------|-----------|
| 12 | 1 | 0 | -2.043149 | 1.981299  | -0.803123 |
| 13 | 7 | 0 | 0.000000  | -1.883775 | -0.695320 |
| 14 | 7 | 0 | -1.511585 | 0.000000  | -0.436765 |
| 15 | 7 | 0 | 1.511585  | 0.000000  | -0.436765 |
| 16 | 7 | 0 | 0.000000  | 1.883775  | -0.695320 |
| 17 | 7 | 0 | -1.895746 | 0.000000  | 0.902965  |
| 18 | 7 | 0 | 1.895746  | 0.000000  | 0.902965  |
| 19 | 7 | 0 | 0.000000  | 3.206973  | -0.227568 |
| 20 | 7 | 0 | 0.000000  | -3.206973 | -0.227568 |
| 21 | 8 | 0 | -1.083630 | 3.725295  | -0.052902 |
| 22 | 8 | 0 | 1.083630  | 3.725295  | -0.052902 |
| 23 | 8 | 0 | 2.043942  | 1.089626  | 1.419460  |
| 24 | 8 | 0 | 2.043942  | -1.089626 | 1.419460  |
| 25 | 8 | 0 | -1.083630 | -3.725295 | -0.052902 |
| 26 | 8 | 0 | 1.083630  | -3.725295 | -0.052902 |
| 27 | 8 | 0 | -2.043942 | -1.089626 | 1.419460  |
| 28 | 8 | 0 | -2.043942 | 1.089626  | 1.419460  |

-----  
**HMX (chair conformer)**

Zero-point correction= 0.191510 (Hartree/Particle)  
Thermal correction to Energy= 0.208772  
Thermal correction to Enthalpy= 0.209716  
Thermal correction to Gibbs Free Energy= 0.144247

**Electronic energy:**

B3LYP = -1197.112482  
DLPNO-CCSD(T) = -1195.23082782

-----

| Center<br>Number | Atomic<br>Number | Atomic<br>Type | Coordinates (Angstroms) |           |           |
|------------------|------------------|----------------|-------------------------|-----------|-----------|
|                  |                  |                | X                       | Y         | Z         |
| 1                | 6                | 0              | 1.236143                | 0.323749  | -1.181711 |
| 2                | 6                | 0              | -1.236138               | -0.323739 | 1.181696  |
| 3                | 6                | 0              | -1.131717               | 1.201500  | -0.874425 |

-----

|    |   |   |           |           |           |
|----|---|---|-----------|-----------|-----------|
| 4  | 1 | 0 | 0.678961  | -0.262065 | -1.909298 |
| 5  | 1 | 0 | -0.678954 | 0.262072  | 1.909283  |
| 6  | 1 | 0 | 2.038335  | 0.852093  | -1.686505 |
| 7  | 1 | 0 | -2.038330 | -0.852083 | 1.686490  |
| 8  | 1 | 0 | -1.521471 | 2.205133  | -1.002220 |
| 9  | 1 | 0 | -1.272735 | 0.651405  | -1.803343 |
| 10 | 6 | 0 | 1.131719  | -1.201496 | 0.874406  |
| 11 | 1 | 0 | 1.272737  | -0.651412 | 1.803331  |
| 12 | 1 | 0 | 1.521469  | -2.205132 | 1.002190  |
| 13 | 7 | 0 | 1.866903  | -0.549146 | -0.219207 |
| 14 | 7 | 0 | 0.276679  | 1.249630  | -0.598687 |
| 15 | 7 | 0 | -0.276677 | -1.249619 | 0.598666  |
| 16 | 7 | 0 | -1.866899 | 0.549161  | 0.219196  |
| 17 | 7 | 0 | -3.231531 | 0.434530  | 0.018048  |
| 18 | 8 | 0 | -3.653492 | 0.953676  | -1.003814 |
| 19 | 8 | 0 | -3.888966 | -0.122299 | 0.873930  |
| 20 | 7 | 0 | 3.231534  | -0.434515 | -0.018056 |
| 21 | 8 | 0 | 3.888971  | 0.122317  | -0.873934 |
| 22 | 8 | 0 | 3.653493  | -0.953667 | 1.003805  |
| 23 | 7 | 0 | 0.759140  | 2.284045  | 0.190178  |
| 24 | 8 | 0 | -0.066805 | 3.034820  | 0.674986  |
| 25 | 8 | 0 | 1.966241  | 2.321741  | 0.341649  |
| 26 | 7 | 0 | -0.759140 | -2.284028 | -0.190205 |
| 27 | 8 | 0 | -1.966250 | -2.321786 | -0.341590 |
| 28 | 8 | 0 | 0.066796  | -3.034863 | -0.674937 |

-----  
**DATN**

Zero-point correction= 0.245495 (Hartree/Particle)

Thermal correction to Energy= 0.270265

Thermal correction to Enthalpy= 0.271209

Thermal correction to Gibbs Free Energy= 0.185309

**Electronic energy:**

B3LYP = -1564.9775035

| Center<br>Number | Atomic<br>Number | Atomic<br>Type | Coordinates (Angstroms) |           |           |
|------------------|------------------|----------------|-------------------------|-----------|-----------|
|                  |                  |                | X                       | Y         | Z         |
| 1                | 6                | 0              | 4.214140                | -0.591672 | 0.562740  |
| 2                | 1                | 0              | 4.272229                | -0.357880 | 1.620528  |
| 3                | 1                | 0              | 5.211367                | -0.689183 | 0.144006  |
| 4                | 6                | 0              | 0.139310                | 0.702685  | -0.156170 |
| 5                | 1                | 0              | -0.217106               | -0.283726 | -0.431296 |
| 6                | 1                | 0              | 0.544098                | 1.197792  | -1.031298 |
| 7                | 6                | 0              | 2.506294                | 1.279810  | 0.637348  |
| 8                | 1                | 0              | 2.302132                | 2.193056  | 0.094161  |
| 9                | 1                | 0              | 2.889054                | 1.516715  | 1.623192  |
| 10               | 6                | 0              | -2.268961               | 0.805549  | 0.697623  |
| 11               | 1                | 0              | -2.199480               | 0.343614  | 1.678153  |
| 12               | 1                | 0              | -3.013596               | 1.592997  | 0.713732  |
| 13               | 7                | 0              | 1.240578                | 0.582550  | 0.787601  |
| 14               | 7                | 0              | -0.997190               | 1.432002  | 0.349129  |
| 15               | 7                | 0              | 3.544347                | 0.538393  | -0.056960 |
| 16               | 7                | 0              | -2.620463               | -0.247953 | -0.230779 |
| 17               | 7                | 0              | -0.917621               | 2.808774  | 0.351897  |
| 18               | 7                | 0              | 3.478926                | 0.508670  | -1.448942 |
| 19               | 7                | 0              | -3.262260               | 0.157035  | -1.402569 |
| 20               | 7                | 0              | 1.066009                | -0.251920 | 1.864479  |
| 21               | 8                | 0              | -3.155084               | 1.331830  | -1.696603 |
| 22               | 8                | 0              | -3.839693               | -0.705770 | -2.038290 |
| 23               | 8                | 0              | 4.225191                | -0.271281 | -2.009631 |
| 24               | 8                | 0              | 2.702267                | 1.276541  | -1.990608 |
| 25               | 8                | 0              | -0.003896               | -0.844581 | 1.928120  |
| 26               | 8                | 0              | 1.971311                | -0.330810 | 2.674652  |
| 27               | 8                | 0              | 0.151460                | 3.286410  | -0.005186 |
| 28               | 8                | 0              | -1.886866               | 3.434047  | 0.734412  |
| 29               | 7                | 0              | 3.442083                | -1.835982 | 0.431547  |



|    |   |   |           |           |           |
|----|---|---|-----------|-----------|-----------|
| 30 | 7 | 0 | 3.909457  | -2.684807 | -0.330621 |
| 31 | 7 | 0 | 4.240079  | -3.542357 | -0.978786 |
| 32 | 6 | 0 | -2.918027 | -1.583825 | 0.257088  |
| 33 | 1 | 0 | -2.838897 | -2.281878 | -0.570883 |
| 34 | 1 | 0 | -2.155149 | -1.804350 | 0.996925  |
| 35 | 7 | 0 | -4.215527 | -1.674632 | 0.934682  |
| 36 | 7 | 0 | -5.146118 | -2.146383 | 0.275175  |
| 37 | 7 | 0 | -6.069257 | -2.573896 | -0.203558 |

-----  
**BC-HMX**

Zero-point correction= 0.166186 (Hartree/Particle)  
Thermal correction to Energy= 0.182813  
Thermal correction to Enthalpy= 0.183757  
Thermal correction to Gibbs Free Energy= 0.119309

**Electronic energy:**

B3LYP = -1195.8942716  
W1-F12 = -1196.02804802

-----

| Center<br>Number | Atomic<br>Number | Atomic<br>Type | Coordinates (Angstroms) |           |           |
|------------------|------------------|----------------|-------------------------|-----------|-----------|
|                  |                  |                | X                       | Y         | Z         |
| 1                | 1                | 0              | 0.046783                | -1.231214 | -1.336921 |
| 2                | 7                | 0              | -1.380803               | -1.118006 | 0.219225  |
| 3                | 7                | 0              | -1.928293               | -2.361552 | -0.055135 |
| 4                | 7                | 0              | -1.380765               | 1.118048  | 0.219260  |
| 5                | 7                | 0              | 2.112384                | 1.816719  | -0.121278 |
| 6                | 7                | 0              | -1.928226               | 2.361611  | -0.055111 |
| 7                | 7                | 0              | 1.011336                | 1.157457  | 0.506442  |
| 8                | 7                | 0              | 2.112299                | -1.816812 | -0.121247 |
| 9                | 7                | 0              | 1.011292                | -1.157476 | 0.506459  |
| 10               | 8                | 0              | 3.144069                | 1.826167  | 0.511411  |
| 11               | 8                | 0              | -1.163961               | -3.209287 | -0.467829 |
| 12               | 8                | 0              | -1.163875               | 3.209321  | -0.467818 |

|    |   |   |           |           |           |
|----|---|---|-----------|-----------|-----------|
| 13 | 8 | 0 | -3.117669 | 2.476736  | 0.177583  |
| 14 | 8 | 0 | 1.897995  | 2.351180  | -1.185971 |
| 15 | 8 | 0 | 1.897882  | -2.351178 | -1.185980 |
| 16 | 8 | 0 | 3.143998  | -1.826315 | 0.511423  |
| 17 | 8 | 0 | -3.117737 | -2.476651 | 0.177574  |
| 18 | 6 | 0 | -0.094534 | 0.780525  | -0.359941 |
| 19 | 6 | 0 | -0.094554 | -0.780515 | -0.359944 |
| 20 | 6 | 0 | 1.349050  | -0.000008 | 1.336034  |
| 21 | 6 | 0 | -2.307957 | 0.000034  | 0.338814  |
| 22 | 1 | 0 | 0.046790  | 1.231222  | -1.336919 |
| 23 | 1 | 0 | 2.388853  | -0.000025 | 1.632029  |
| 24 | 1 | 0 | 0.705881  | 0.000012  | 2.212786  |
| 25 | 1 | 0 | -3.058300 | 0.000059  | -0.454668 |
| 26 | 1 | 0 | -2.812220 | 0.000027  | 1.300472  |

-----  
**ETN**

Zero-point correction= 0.157688 (Hartree/Particle)  
Thermal correction to Energy= 0.177374  
Thermal correction to Enthalpy= 0.178318  
Thermal correction to Gibbs Free Energy= 0.101136

**Electronic energy:**

B3LYP = -1277.7555946  
W1-F12 = -1277.94067950  
DLPNO-CCSD(T) = -1275.819200983

-----

| Center<br>Number | Atomic<br>Number | Atomic<br>Type | Coordinates (Angstroms) |           |           |
|------------------|------------------|----------------|-------------------------|-----------|-----------|
|                  |                  |                | X                       | Y         | Z         |
| 1                | 6                | 0              | -1.860053               | -0.513859 | 0.194609  |
| 2                | 6                | 0              | -0.664190               | 0.349801  | -0.163217 |
| 3                | 1                | 0              | -1.789192               | -1.485908 | -0.288771 |
| 4                | 1                | 0              | -1.934216               | -0.644554 | 1.273399  |
| 5                | 6                | 0              | 0.664190                | -0.349801 | 0.163217  |

-----

|    |   |   |           |           |           |
|----|---|---|-----------|-----------|-----------|
| 6  | 1 | 0 | -0.696790 | 0.616910  | -1.217442 |
| 7  | 6 | 0 | 1.860053  | 0.513859  | -0.194609 |
| 8  | 1 | 0 | 0.696790  | -0.616910 | 1.217442  |
| 9  | 1 | 0 | 1.934216  | 0.644554  | -1.273399 |
| 10 | 1 | 0 | 1.789192  | 1.485908  | 0.288771  |
| 11 | 8 | 0 | -2.996762 | 0.205595  | -0.300896 |
| 12 | 8 | 0 | -0.710977 | 1.541921  | 0.631387  |
| 13 | 8 | 0 | 0.710977  | -1.541921 | -0.631387 |
| 14 | 8 | 0 | 2.996762  | -0.205595 | 0.300896  |
| 15 | 7 | 0 | -4.246438 | -0.419783 | -0.004137 |
| 16 | 8 | 0 | -4.201977 | -1.464170 | 0.589289  |
| 17 | 8 | 0 | -5.176211 | 0.207936  | -0.405817 |
| 18 | 7 | 0 | -0.982372 | 2.779592  | -0.086678 |
| 19 | 8 | 0 | -1.002842 | 2.733262  | -1.282022 |
| 20 | 8 | 0 | -1.127695 | 3.687842  | 0.665239  |
| 21 | 7 | 0 | 0.982372  | -2.779592 | 0.086678  |
| 22 | 8 | 0 | 1.002842  | -2.733262 | 1.282022  |
| 23 | 8 | 0 | 1.127695  | -3.687842 | -0.665239 |
| 24 | 7 | 0 | 4.246438  | 0.419783  | 0.004137  |
| 25 | 8 | 0 | 4.201977  | 1.464170  | -0.589289 |
| 26 | 8 | 0 | 5.176211  | -0.207936 | 0.405817  |

-----  
**PETN**

Zero-point correction= 0.186948 (Hartree/Particle)  
Thermal correction to Energy= 0.207781  
Thermal correction to Enthalpy= 0.208726  
Thermal correction to Gibbs Free Energy= 0.132084

**Electronic energy:**

B3LYP = -1317.0937455  
W1-F12 = -1317.27303193  
DLPNO-CCSD(T) = -1315.07923547

-----  
Center Atomic Atomic Coordinates (Angstroms)

| Number | Number | Type | X         | Y         | Z         |
|--------|--------|------|-----------|-----------|-----------|
| 1      | 6      | 0    | 0.867608  | 0.867630  | 0.923858  |
| 2      | 1      | 0    | 0.246069  | 1.502191  | 1.551209  |
| 3      | 1      | 0    | 1.501954  | 0.246116  | 1.551451  |
| 4      | 8      | 0    | 1.681254  | 1.680979  | 0.063712  |
| 5      | 7      | 0    | 2.562192  | 2.561914  | 0.761606  |
| 6      | 8      | 0    | 2.526902  | 2.526855  | 1.961397  |
| 7      | 8      | 0    | 3.223033  | 3.222529  | 0.020557  |
| 8      | 6      | 0    | -0.867608 | 0.867630  | -0.923858 |
| 9      | 1      | 0    | -0.246069 | 1.502191  | -1.551209 |
| 10     | 1      | 0    | -1.501954 | 0.246116  | -1.551451 |
| 11     | 6      | 0    | 0.867608  | -0.867630 | -0.923858 |
| 12     | 1      | 0    | 0.246069  | -1.502191 | -1.551209 |
| 13     | 1      | 0    | 1.501954  | -0.246116 | -1.551451 |
| 14     | 6      | 0    | -0.867608 | -0.867630 | 0.923858  |
| 15     | 1      | 0    | -1.501954 | -0.246116 | 1.551451  |
| 16     | 1      | 0    | -0.246069 | -1.502191 | 1.551209  |
| 17     | 8      | 0    | -1.681254 | -1.680979 | 0.063712  |
| 18     | 8      | 0    | 1.681254  | -1.680979 | -0.063712 |
| 19     | 8      | 0    | -1.681254 | 1.680979  | -0.063712 |
| 20     | 7      | 0    | 2.562192  | -2.561914 | -0.761606 |
| 21     | 8      | 0    | 3.223033  | -3.222529 | -0.020557 |
| 22     | 8      | 0    | 2.526902  | -2.526855 | -1.961397 |
| 23     | 7      | 0    | -2.562192 | -2.561914 | 0.761606  |
| 24     | 8      | 0    | -2.526902 | -2.526855 | 1.961397  |
| 25     | 8      | 0    | -3.223033 | -3.222529 | 0.020557  |
| 26     | 7      | 0    | -2.562192 | 2.561914  | -0.761606 |
| 27     | 8      | 0    | -3.223033 | 3.222529  | -0.020557 |
| 28     | 8      | 0    | -2.526902 | 2.526855  | -1.961397 |
| 29     | 6      | 0    | 0.000000  | 0.000000  | 0.000000  |

SMX

Zero-point correction= 0.219298 (Hartree/Particle)  
 Thermal correction to Energy= 0.246214  
 Thermal correction to Enthalpy= 0.247158  
 Thermal correction to Gibbs Free Energy= 0.156395

**Electronic energy:**

B3LYP = -1765.5783172

DLPNO-CCSD(T) = -1762.89786073

---

| Center<br>Number | Atomic<br>Number | Atomic<br>Type | Coordinates (Angstroms) |           |           |
|------------------|------------------|----------------|-------------------------|-----------|-----------|
|                  |                  |                | X                       | Y         | Z         |
| 1                | 6                | 0              | -1.617727               | 0.445539  | 1.183629  |
| 2                | 6                | 0              | -0.680481               | -0.223720 | 0.151063  |
| 3                | 1                | 0              | -1.758984               | -0.248095 | 2.012736  |
| 4                | 1                | 0              | -1.185991               | 1.360518  | 1.572915  |
| 5                | 6                | 0              | 0.821987                | -0.112597 | 0.627505  |
| 6                | 6                | 0              | 1.732945                | -1.111482 | -0.084288 |
| 7                | 1                | 0              | 1.431911                | -2.132367 | 0.122781  |
| 8                | 1                | 0              | 1.720211                | -0.924989 | -1.154973 |
| 9                | 8                | 0              | -2.895015               | 0.721083  | 0.638893  |
| 10               | 8                | 0              | 3.035222                | -0.873983 | 0.459576  |
| 11               | 7                | 0              | -3.284909               | 2.132857  | 0.675613  |
| 12               | 8                | 0              | -2.587750               | 2.885663  | 1.290062  |
| 13               | 8                | 0              | -4.296368               | 2.307532  | 0.081130  |
| 14               | 7                | 0              | 4.049150                | -1.730483 | -0.095367 |
| 15               | 8                | 0              | 3.687621                | -2.520596 | -0.922098 |
| 16               | 8                | 0              | 5.122214                | -1.512932 | 0.368409  |
| 17               | 7                | 0              | -0.763813               | 0.564096  | -1.189887 |
| 18               | 8                | 0              | -1.027875               | 1.745025  | -1.112429 |
| 19               | 8                | 0              | -0.531414               | -0.051494 | -2.205011 |
| 20               | 7                | 0              | 0.811795                | -0.499118 | 2.139479  |
| 21               | 8                | 0              | 0.729285                | -1.680296 | 2.405813  |
| 22               | 8                | 0              | 0.852071                | 0.410068  | 2.939827  |

|    |   |   |           |           |           |
|----|---|---|-----------|-----------|-----------|
| 23 | 6 | 0 | -1.059710 | -1.676659 | -0.131248 |
| 24 | 1 | 0 | -0.476177 | -2.076630 | -0.953032 |
| 25 | 1 | 0 | -0.890101 | -2.273324 | 0.762263  |
| 26 | 6 | 0 | 1.389512  | 1.319530  | 0.556303  |
| 27 | 1 | 0 | 0.649836  | 2.063789  | 0.827314  |
| 28 | 1 | 0 | 2.243793  | 1.407503  | 1.219868  |
| 29 | 8 | 0 | 1.801065  | 1.495880  | -0.802063 |
| 30 | 8 | 0 | -2.444433 | -1.680264 | -0.480131 |
| 31 | 7 | 0 | 2.017894  | 2.876839  | -1.170784 |
| 32 | 8 | 0 | 1.870593  | 3.692645  | -0.306661 |
| 33 | 8 | 0 | 2.328119  | 2.983923  | -2.312678 |
| 34 | 7 | 0 | -2.928335 | -2.986606 | -0.832009 |
| 35 | 8 | 0 | -2.136913 | -3.888672 | -0.770217 |
| 36 | 8 | 0 | -4.077187 | -2.973976 | -1.137042 |

---

### C4H10

Zero-point correction= 0.131652 (Hartree/Particle)

Thermal correction to Energy= 0.137428

Thermal correction to Enthalpy= 0.138372

Thermal correction to Gibbs Free Energy= 0.103652

### Electronic energy:

B3LYP = -158.5388223

W1-F12 = -158.49528974

DLPNO-CCSD(T) = -158.204411

---

| Center<br>Number | Atomic<br>Number | Atomic<br>Type | Coordinates (Angstroms) |           |           |
|------------------|------------------|----------------|-------------------------|-----------|-----------|
|                  |                  |                | X                       | Y         | Z         |
| 1                | 6                | 0              | -1.876958               | -0.518934 | 0.186545  |
| 2                | 6                | 0              | -0.664093               | 0.331020  | -0.180313 |
| 3                | 1                | 0              | -1.850704               | -1.482178 | -0.327235 |
| 4                | 1                | 0              | -1.905191               | -0.719859 | 1.259519  |
| 5                | 6                | 0              | 0.664093                | -0.331020 | 0.180313  |

|    |   |   |           |           |           |
|----|---|---|-----------|-----------|-----------|
| 6  | 1 | 0 | -0.677138 | 0.546023  | -1.253194 |
| 7  | 6 | 0 | 1.876958  | 0.518934  | -0.186545 |
| 8  | 1 | 0 | 0.677138  | -0.546023 | 1.253194  |
| 9  | 1 | 0 | 1.905191  | 0.719859  | -1.259519 |
| 10 | 1 | 0 | 1.850704  | 1.482178  | 0.327235  |
| 11 | 1 | 0 | -2.810741 | -0.023990 | -0.083306 |
| 12 | 1 | 0 | -0.728990 | 1.300533  | 0.322933  |
| 13 | 1 | 0 | 0.728990  | -1.300533 | -0.322933 |
| 14 | 1 | 0 | 2.810741  | 0.023990  | 0.083306  |

-----  
**C6H12(NO2)2**

Zero-point correction= 0.193757 (Hartree/Particle)  
Thermal correction to Energy= 0.206500  
Thermal correction to Enthalpy= 0.207444  
Thermal correction to Gibbs Free Energy= 0.156269

**Electronic energy:**

B3LYP = -646.3950873  
W1-F12 = -646.42229632  
DLPNO-CCSD(T) = -645.31409231

-----

| Center<br>Number | Atomic<br>Number | Atomic<br>Type | Coordinates (Angstroms) |           |           |
|------------------|------------------|----------------|-------------------------|-----------|-----------|
|                  |                  |                | X                       | Y         | Z         |
| 1                | 6                | 0              | 0.571160                | 1.496583  | -1.034853 |
| 2                | 6                | 0              | -0.140740               | 0.778711  | 0.104074  |
| 3                | 1                | 0              | 1.637458                | 1.530683  | -0.820823 |
| 4                | 1                | 0              | 0.420717                | 1.014294  | -1.995248 |
| 5                | 6                | 0              | 0.140740                | -0.778711 | 0.104074  |
| 6                | 6                | 0              | -0.140740               | -1.469092 | 1.434533  |
| 7                | 1                | 0              | 0.464773                | -1.060601 | 2.236051  |
| 8                | 1                | 0              | -1.191646               | -1.353074 | 1.684049  |
| 9                | 7                | 0              | -1.675048               | 0.901436  | -0.133545 |
| 10               | 8                | 0              | -2.058741               | 1.310649  | -1.210188 |

|    |   |   |           |           |           |
|----|---|---|-----------|-----------|-----------|
| 11 | 8 | 0 | -2.405210 | 0.563681  | 0.782026  |
| 12 | 7 | 0 | 1.675048  | -0.901436 | -0.133545 |
| 13 | 8 | 0 | 2.405210  | -0.563681 | 0.782026  |
| 14 | 8 | 0 | 2.058741  | -1.310649 | -1.210188 |
| 15 | 6 | 0 | 0.140740  | 1.469092  | 1.434533  |
| 16 | 1 | 0 | -0.464773 | 1.060601  | 2.236051  |
| 17 | 1 | 0 | 1.191646  | 1.353074  | 1.684049  |
| 18 | 6 | 0 | -0.571160 | -1.496583 | -1.034853 |
| 19 | 1 | 0 | -0.420717 | -1.014294 | -1.995248 |
| 20 | 1 | 0 | -0.209368 | -2.518640 | -1.109029 |
| 21 | 1 | 0 | 0.209368  | 2.518640  | -1.109029 |
| 22 | 1 | 0 | -0.079879 | 2.532108  | 1.342591  |
| 23 | 1 | 0 | 0.079879  | -2.532108 | 1.342591  |
| 24 | 1 | 0 | -1.637458 | -1.530683 | -0.820823 |

-----  
**PMDA**

Zero-point correction= 0.179448 (Hartree/Particle)  
Thermal correction to Energy= 0.186623  
Thermal correction to Enthalpy= 0.187567  
Thermal correction to Gibbs Free Energy= 0.148394

**Electronic energy:**

B3LYP = -345.4819524  
W1-F12 = -345.44356115  
W2-F12 = -345.44408480

-----

| Center<br>Number | Atomic<br>Number | Atomic<br>Type | Coordinates (Angstroms) |           |           |
|------------------|------------------|----------------|-------------------------|-----------|-----------|
|                  |                  |                | X                       | Y         | Z         |
| 1                | 6                | 0              | -1.288110               | -1.261780 | 0.235953  |
| 2                | 6                | 0              | -2.080937               | 0.015584  | -0.049563 |
| 3                | 6                | 0              | -1.268763               | 1.264309  | 0.300515  |
| 4                | 6                | 0              | 0.078791                | 1.278995  | -0.428676 |
| 5                | 6                | 0              | 0.838592                | -0.002034 | -0.171095 |



|    |   |   |           |           |           |
|----|---|---|-----------|-----------|-----------|
| 6  | 6 | 0 | 0.056150  | -1.252946 | -0.498164 |
| 7  | 1 | 0 | -1.833089 | 2.166678  | 0.058900  |
| 8  | 1 | 0 | -2.348172 | 0.043031  | -1.111252 |
| 9  | 1 | 0 | -3.019112 | 0.009147  | 0.508378  |
| 10 | 1 | 0 | -1.111627 | -1.341694 | 1.313070  |
| 11 | 1 | 0 | -1.864210 | -2.142451 | -0.052707 |
| 12 | 1 | 0 | -0.085777 | 1.379600  | -1.506312 |
| 13 | 1 | 0 | 0.684388  | 2.126046  | -0.103115 |
| 14 | 1 | 0 | -0.115854 | -1.278902 | -1.578498 |
| 15 | 1 | 0 | 0.656213  | -2.130414 | -0.252215 |
| 16 | 1 | 0 | -1.083514 | 1.285569  | 1.377926  |
| 17 | 7 | 0 | 1.695220  | 0.022744  | 0.997192  |
| 18 | 1 | 0 | 1.791343  | -0.921993 | 1.362932  |
| 19 | 7 | 0 | 2.261731  | -0.067843 | -0.393476 |
| 20 | 1 | 0 | 2.616414  | 0.868312  | -0.576945 |

-----  
**24-DNI**

Zero-point correction= 0.076174 (Hartree/Particle)  
Thermal correction to Energy= 0.084707  
Thermal correction to Enthalpy= 0.085651  
Thermal correction to Gibbs Free Energy= 0.041197

**Electronic energy:**

B3LYP = -635.494867  
W1-F12 = -635.56009325  
W2-F12 = -635.56316575

-----

| Center<br>Number | Atomic<br>Number | Atomic<br>Type | Coordinates (Angstroms) |           |          |
|------------------|------------------|----------------|-------------------------|-----------|----------|
|                  |                  |                | X                       | Y         | Z        |
| 1                | 6                | 0              | 1.067080                | -0.111881 | 0.000000 |
| 2                | 7                | 0              | 0.000000                | 0.717108  | 0.000000 |
| 3                | 6                | 0              | 0.695911                | -1.440644 | 0.000000 |
| 4                | 1                | 0              | 1.274562                | -2.345026 | 0.000000 |

-----

|    |   |   |           |           |          |
|----|---|---|-----------|-----------|----------|
| 5  | 6 | 0 | -1.019566 | -0.091374 | 0.000000 |
| 6  | 7 | 0 | -0.660829 | -1.406167 | 0.000000 |
| 7  | 7 | 0 | 2.435135  | 0.368752  | 0.000000 |
| 8  | 8 | 0 | 3.299132  | -0.500986 | 0.000000 |
| 9  | 8 | 0 | 2.622581  | 1.566518  | 0.000000 |
| 10 | 7 | 0 | -2.420178 | 0.273588  | 0.000000 |
| 11 | 8 | 0 | -3.202845 | -0.674699 | 0.000000 |
| 12 | 8 | 0 | -2.706691 | 1.448199  | 0.000000 |
| 13 | 1 | 0 | -1.311433 | -2.176806 | 0.000000 |

---

#### 45-DNI

Zero-point correction= 0.076107 (Hartree/Particle)  
 Thermal correction to Energy= 0.084814  
 Thermal correction to Enthalpy= 0.085758  
 Thermal correction to Gibbs Free Energy= 0.040478

#### Electronic energy:

B3LYP = -635.4867166  
 W1-F12 = -635.55194529  
 W2-F12 = -635.55502848

---

| Center<br>Number | Atomic<br>Number | Atomic<br>Type | Coordinates (Angstroms) |           |           |
|------------------|------------------|----------------|-------------------------|-----------|-----------|
|                  |                  |                | X                       | Y         | Z         |
| 1                | 6                | 0              | -0.645816               | 0.478874  | -0.029328 |
| 2                | 7                | 0              | -0.872649               | 1.805394  | -0.067285 |
| 3                | 6                | 0              | 0.703138                | 0.213526  | -0.005310 |
| 4                | 6                | 0              | 0.323789                | 2.366493  | -0.072310 |
| 5                | 7                | 0              | 1.308499                | 1.441593  | -0.031448 |
| 6                | 7                | 0              | -1.758112               | -0.468614 | -0.047608 |
| 7                | 8                | 0              | -1.785590               | -1.254328 | -0.974816 |
| 8                | 8                | 0              | -2.564529               | -0.371042 | 0.854991  |
| 9                | 1                | 0              | 2.308677                | 1.571515  | -0.011794 |
| 10               | 7                | 0              | 1.476785                | -0.979523 | 0.090656  |

|    |   |   |          |           |           |
|----|---|---|----------|-----------|-----------|
| 11 | 8 | 0 | 2.695851 | -0.839223 | 0.016931  |
| 12 | 8 | 0 | 0.880272 | -2.028169 | 0.246494  |
| 13 | 1 | 0 | 0.514961 | 3.425280  | -0.105527 |

---

### 34-DNP

Zero-point correction= 0.075452 (Hartree/Particle)  
 Thermal correction to Energy= 0.084284  
 Thermal correction to Enthalpy= 0.085228  
 Thermal correction to Gibbs Free Energy= 0.038934

### Electronic energy:

B3LYP = -635.4675432  
 W1-F12 = -635.53259701  
 W2-F12 = -635.53561033

---

| Center<br>Number | Atomic<br>Number | Atomic<br>Type | Coordinates (Angstroms) |           |           |
|------------------|------------------|----------------|-------------------------|-----------|-----------|
|                  |                  |                | X                       | Y         | Z         |
| 1                | 6                | 0              | 1.354282                | 1.493941  | 0.013982  |
| 2                | 7                | 0              | 0.331002                | 2.362177  | 0.035529  |
| 3                | 1                | 0              | 0.376872                | 3.367117  | 0.054127  |
| 4                | 1                | 0              | 2.389622                | 1.782185  | 0.000312  |
| 5                | 6                | 0              | 0.771734                | 0.242968  | 0.000007  |
| 6                | 6                | 0              | -0.615269               | 0.489403  | 0.010349  |
| 7                | 7                | 0              | -0.882522               | 1.772803  | 0.033454  |
| 8                | 7                | 0              | 1.466256                | -1.009248 | -0.072358 |
| 9                | 8                | 0              | 0.789963                | -2.008671 | -0.249331 |
| 10               | 8                | 0              | 2.683915                | -0.975277 | 0.036584  |
| 11               | 7                | 0              | -1.716783               | -0.474622 | 0.051126  |
| 12               | 8                | 0              | -2.412740               | -0.550579 | -0.940065 |
| 13               | 8                | 0              | -1.838219               | -1.098590 | 1.085972  |

---

### 35-DNP

Zero-point correction= 0.075446 (Hartree/Particle)

Thermal correction to Energy= 0.084071  
Thermal correction to Enthalpy= 0.085016  
Thermal correction to Gibbs Free Energy= 0.040315

**Electronic energy:**

B3LYP = -635.4753566  
W1-F12 = -635.53994866  
W2-F12 = -635.54292669

---

| Center<br>Number | Atomic<br>Number | Atomic<br>Type | Coordinates (Angstroms) |           |          |
|------------------|------------------|----------------|-------------------------|-----------|----------|
|                  |                  |                | X                       | Y         | Z        |
| 1                | 6                | 0              | -1.069189               | -0.057812 | 0.000000 |
| 2                | 7                | 0              | -0.587450               | -1.325874 | 0.000000 |
| 3                | 1                | 0              | -1.133329               | -2.174049 | 0.000000 |
| 4                | 6                | 0              | 0.000000                | 0.804696  | 0.000000 |
| 5                | 6                | 0              | 1.090107                | -0.077418 | 0.000000 |
| 6                | 7                | 0              | 0.735517                | -1.357227 | 0.000000 |
| 7                | 7                | 0              | 2.496547                | 0.300336  | 0.000000 |
| 8                | 8                | 0              | 3.326865                | -0.584673 | 0.000000 |
| 9                | 8                | 0              | 2.717480                | 1.502756  | 0.000000 |
| 10               | 7                | 0              | -2.485233               | 0.186183  | 0.000000 |
| 11               | 8                | 0              | -2.853005               | 1.345327  | 0.000000 |
| 12               | 8                | 0              | -3.204408               | -0.806433 | 0.000000 |
| 13               | 1                | 0              | -0.003295               | 1.877512  | 0.000000 |

---

**1-ADP**

Zero-point correction= 0.092591 (Hartree/Particle)  
Thermal correction to Energy= 0.102504  
Thermal correction to Enthalpy= 0.103448  
Thermal correction to Gibbs Free Energy= 0.056004

**Electronic energy:**

B3LYP = -690.8221844  
W1-F12 = -690.88555275

W2-F12 = -690.88865474

---

| Center<br>Number | Atomic<br>Number | Atomic<br>Type | Coordinates (Angstroms) |           |           |
|------------------|------------------|----------------|-------------------------|-----------|-----------|
|                  |                  |                | X                       | Y         | Z         |
| 1                | 6                | 0              | -0.935727               | -0.255372 | -0.033880 |
| 2                | 7                | 0              | -0.577540               | 1.066508  | -0.025309 |
| 3                | 6                | 0              | 0.232754                | -0.999883 | -0.023670 |
| 4                | 6                | 0              | 1.217654                | -0.024153 | -0.010692 |
| 5                | 7                | 0              | 0.722796                | 1.222560  | -0.019690 |
| 6                | 7                | 0              | 2.649257                | -0.241540 | 0.019117  |
| 7                | 8                | 0              | 3.375255                | 0.732842  | 0.057300  |
| 8                | 8                | 0              | 3.009311                | -1.410552 | 0.004287  |
| 9                | 7                | 0              | -2.287033               | -0.715671 | 0.016927  |
| 10               | 8                | 0              | -2.463321               | -1.915194 | -0.079685 |
| 11               | 8                | 0              | -3.174219               | 0.124459  | 0.169460  |
| 12               | 1                | 0              | 0.332820                | -2.067892 | -0.012516 |
| 13               | 7                | 0              | -1.390985               | 2.177300  | -0.175324 |
| 14               | 1                | 0              | -2.294031               | 1.969823  | 0.236643  |
| 15               | 1                | 0              | -0.918548               | 2.957979  | 0.264378  |

---

### 5-ADP

Zero-point correction= 0.091775 (Hartree/Particle)

Thermal correction to Energy= 0.102068

Thermal correction to Enthalpy= 0.103012

Thermal correction to Gibbs Free Energy= 0.054777

### Electronic energy:

B3LYP = -690.8645528

W1-F12 = -690.92793711

W2-F12 = -690.93110247

---

| Center<br>Number | Atomic<br>Number | Atomic<br>Type | Coordinates (Angstroms) |   |   |
|------------------|------------------|----------------|-------------------------|---|---|
|                  |                  |                | X                       | Y | Z |

|    |   |   |           |           |           |
|----|---|---|-----------|-----------|-----------|
| 1  | 6 | 0 | -1.510256 | -0.841756 | 0.036166  |
| 2  | 7 | 0 | -0.857820 | -2.024010 | 0.025499  |
| 3  | 1 | 0 | -1.252750 | -2.946508 | 0.076857  |
| 4  | 6 | 0 | -0.498501 | 0.128946  | 0.025753  |
| 5  | 6 | 0 | 0.706698  | -0.612511 | 0.005484  |
| 6  | 7 | 0 | 0.504819  | -1.897581 | 0.008122  |
| 7  | 7 | 0 | -0.706681 | 1.518669  | -0.089676 |
| 8  | 8 | 0 | 0.260123  | 2.239555  | -0.270114 |
| 9  | 8 | 0 | -1.878223 | 1.917102  | -0.013793 |
| 10 | 7 | 0 | 2.079694  | -0.106718 | 0.060447  |
| 11 | 8 | 0 | 2.801226  | -0.367570 | -0.880711 |
| 12 | 8 | 0 | 2.375103  | 0.517836  | 1.060167  |
| 13 | 7 | 0 | -2.846780 | -0.689696 | 0.081683  |
| 14 | 1 | 0 | -3.164569 | 0.264957  | -0.007928 |
| 15 | 1 | 0 | -3.448802 | -1.426557 | -0.240258 |

### TNP

Zero-point correction= 0.077434 (Hartree/Particle)  
 Thermal correction to Energy= 0.088875  
 Thermal correction to Enthalpy= 0.089820  
 Thermal correction to Gibbs Free Energy= 0.037794

### Electronic energy:

B3LYP = -840.0388949  
 W1-F12 = -840.14418816  
 W2-F12 = -840.14846355

| Center<br>Number | Atomic<br>Number | Atomic<br>Type | Coordinates (Angstroms) |           |          |
|------------------|------------------|----------------|-------------------------|-----------|----------|
|                  |                  |                | X                       | Y         | Z        |
| 1                | 6                | 0              | -1.085713               | -0.612046 | 0.000000 |
| 2                | 7                | 0              | -0.617159               | -1.882590 | 0.000000 |
| 3                | 1                | 0              | -1.179218               | -2.721518 | 0.000000 |

|    |   |   |           |           |           |
|----|---|---|-----------|-----------|-----------|
| 4  | 6 | 0 | 0.011341  | 0.216899  | 0.000000  |
| 5  | 6 | 0 | 1.097553  | -0.672529 | 0.000000  |
| 6  | 7 | 0 | 0.703463  | -1.937848 | 0.000000  |
| 7  | 7 | 0 | 0.013353  | 1.679327  | 0.000000  |
| 8  | 8 | 0 | 0.011341  | 2.211264  | 1.088321  |
| 9  | 8 | 0 | 0.011341  | 2.211264  | -1.088321 |
| 10 | 7 | 0 | 2.510583  | -0.324740 | 0.000000  |
| 11 | 8 | 0 | 2.745768  | 0.873321  | 0.000000  |
| 12 | 8 | 0 | 3.317171  | -1.228228 | 0.000000  |
| 13 | 7 | 0 | -2.494779 | -0.334351 | 0.000000  |
| 14 | 8 | 0 | -2.824708 | 0.834524  | 0.000000  |
| 15 | 8 | 0 | -3.231926 | -1.311022 | 0.000000  |

-----  
**MTNP**

Zero-point correction= 0.104922 (Hartree/Particle)  
Thermal correction to Energy= 0.117971  
Thermal correction to Enthalpy= 0.118915  
Thermal correction to Gibbs Free Energy= 0.063383

**Electronic energy:**

B3LYP = -879.3715799  
W1-F12 = -879.46730380  
W2-F12 = -879.47174409

-----

| Center<br>Number | Atomic<br>Number | Atomic<br>Type | Coordinates (Angstroms) |           |          |
|------------------|------------------|----------------|-------------------------|-----------|----------|
|                  |                  |                | X                       | Y         | Z        |
| 1                | 6                | 0              | 0.792580                | -0.712659 | 0.000000 |
| 2                | 7                | 0              | 1.742020                | 0.269165  | 0.000000 |
| 3                | 6                | 0              | -0.439008               | -0.090708 | 0.000000 |
| 4                | 6                | 0              | -0.126804               | 1.269248  | 0.000000 |
| 5                | 7                | 0              | 1.184462                | 1.469733  | 0.000000 |
| 6                | 7                | 0              | -1.756406               | -0.726287 | 0.000000 |
| 7                | 8                | 0              | -2.236971               | -0.957065 | 1.087972 |

|    |   |   |           |           |           |
|----|---|---|-----------|-----------|-----------|
| 8  | 8 | 0 | -2.236971 | -0.957065 | -1.087972 |
| 9  | 7 | 0 | -1.054987 | 2.386814  | 0.000000  |
| 10 | 8 | 0 | -2.236971 | 2.079630  | 0.000000  |
| 11 | 8 | 0 | -0.593809 | 3.508178  | 0.000000  |
| 12 | 7 | 0 | 1.076545  | -2.123097 | 0.000000  |
| 13 | 8 | 0 | 0.110561  | -2.862428 | 0.000000  |
| 14 | 8 | 0 | 2.250712  | -2.463105 | 0.000000  |
| 15 | 6 | 0 | 3.201010  | 0.169883  | 0.000000  |
| 16 | 1 | 0 | 3.536756  | -0.362463 | 0.884639  |
| 17 | 1 | 0 | 3.536756  | -0.362463 | -0.884639 |
| 18 | 1 | 0 | 3.565971  | 1.190874  | 0.000000  |

-----  
**DNPPy**

Zero-point correction= 0.093215 (Hartree/Particle)  
Thermal correction to Energy= 0.103715  
Thermal correction to Enthalpy= 0.104660  
Thermal correction to Gibbs Free Energy= 0.056292

**Electronic energy:**

B3LYP = -783.1141741  
W1-F12 = -783.18238765  
W2-F12 = -783.18566511

-----

| Center<br>Number | Atomic<br>Number | Atomic<br>Type | Coordinates (Angstroms) |           |          |
|------------------|------------------|----------------|-------------------------|-----------|----------|
|                  |                  |                | X                       | Y         | Z        |
| 1                | 7                | 0              | 1.333642                | 1.042678  | 0.000000 |
| 2                | 6                | 0              | 0.019098                | 0.694093  | 0.000000 |
| 3                | 6                | 0              | -0.019098               | -0.694093 | 0.000000 |
| 4                | 7                | 0              | -1.333642               | -1.042678 | 0.000000 |
| 5                | 7                | 0              | -2.131747               | 0.031249  | 0.000000 |
| 6                | 7                | 0              | 2.131747                | -0.031249 | 0.000000 |
| 7                | 6                | 0              | 1.333642                | -1.088155 | 0.000000 |
| 8                | 6                | 0              | -1.333642               | 1.088155  | 0.000000 |



|    |   |   |           |           |          |
|----|---|---|-----------|-----------|----------|
| 9  | 7 | 0 | -1.821220 | 2.442384  | 0.000000 |
| 10 | 8 | 0 | -3.015393 | 2.648655  | 0.000000 |
| 11 | 8 | 0 | -0.935836 | 3.297473  | 0.000000 |
| 12 | 7 | 0 | 1.821220  | -2.442384 | 0.000000 |
| 13 | 8 | 0 | 3.015393  | -2.648655 | 0.000000 |
| 14 | 8 | 0 | 0.935836  | -3.297473 | 0.000000 |
| 15 | 1 | 0 | 1.733470  | 1.966020  | 0.000000 |
| 16 | 1 | 0 | -1.733470 | -1.966020 | 0.000000 |

-----

**ANPZ**

Zero-point correction= 0.115263 (Hartree/Particle)  
 Thermal correction to Energy= 0.126874  
 Thermal correction to Enthalpy= 0.127819  
 Thermal correction to Gibbs Free Energy= 0.077171

**Electronic energy:**

B3LYP = -784.4244385  
 W1-F12 = -784.47765122  
 W2-F12 = -784.48123233

-----

| Center<br>Number | Atomic<br>Number | Atomic<br>Type | Coordinates (Angstroms) |           |           |
|------------------|------------------|----------------|-------------------------|-----------|-----------|
|                  |                  |                | X                       | Y         | Z         |
| 1                | 6                | 0              | 0.000000                | 1.158121  | 1.241696  |
| 2                | 6                | 0              | 0.000000                | 1.131169  | -0.193852 |
| 3                | 6                | 0              | 0.000000                | -1.131169 | -0.193852 |
| 4                | 6                | 0              | 0.000000                | -1.158121 | 1.241696  |
| 5                | 7                | 0              | 0.000000                | 2.342805  | -1.018148 |
| 6                | 8                | 0              | 0.000000                | 2.229561  | -2.221903 |
| 7                | 8                | 0              | 0.000000                | 3.426414  | -0.418516 |
| 8                | 7                | 0              | 0.000000                | -2.342805 | -1.018148 |
| 9                | 8                | 0              | 0.000000                | -3.426414 | -0.418516 |
| 10               | 8                | 0              | 0.000000                | -2.229561 | -2.221903 |
| 11               | 7                | 0              | 0.000000                | 2.277250  | 1.968257  |

|    |   |   |          |           |           |
|----|---|---|----------|-----------|-----------|
| 12 | 1 | 0 | 0.000000 | 3.165917  | 1.494189  |
| 13 | 1 | 0 | 0.000000 | 2.193144  | 2.969500  |
| 14 | 7 | 0 | 0.000000 | 0.000000  | -0.838578 |
| 15 | 7 | 0 | 0.000000 | 0.000000  | 1.901960  |
| 16 | 7 | 0 | 0.000000 | -2.277250 | 1.968257  |
| 17 | 1 | 0 | 0.000000 | -2.193144 | 2.969500  |
| 18 | 1 | 0 | 0.000000 | -3.165917 | 1.494189  |

-----  
**LLM-105**

Zero-point correction= 0.119203 (Hartree/Particle)  
Thermal correction to Energy= 0.131586  
Thermal correction to Enthalpy= 0.132531  
Thermal correction to Gibbs Free Energy= 0.080511

**Electronic energy:**

B3LYP = -859.6204907  
W1-F12 = -859.69129033  
W2-F12 = -859.69536880

-----

| Center<br>Number | Atomic<br>Number | Atomic<br>Type | Coordinates (Angstroms) |           |           |
|------------------|------------------|----------------|-------------------------|-----------|-----------|
|                  |                  |                | X                       | Y         | Z         |
| 1                | 6                | 0              | 0.000000                | 1.200019  | 0.978531  |
| 2                | 6                | 0              | 0.000000                | 1.130469  | -0.436446 |
| 3                | 6                | 0              | 0.000000                | -1.130469 | -0.436446 |
| 4                | 6                | 0              | 0.000000                | -1.200019 | 0.978531  |
| 5                | 7                | 0              | 0.000000                | 2.352898  | -1.248689 |
| 6                | 8                | 0              | 0.000000                | 2.247182  | -2.451844 |
| 7                | 8                | 0              | 0.000000                | 3.425496  | -0.633876 |
| 8                | 7                | 0              | 0.000000                | -2.352898 | -1.248689 |
| 9                | 8                | 0              | 0.000000                | -3.425496 | -0.633876 |
| 10               | 8                | 0              | 0.000000                | -2.247182 | -2.451844 |
| 11               | 7                | 0              | 0.000000                | 2.265408  | 1.765140  |
| 12               | 1                | 0              | 0.000000                | 3.178600  | 1.343765  |

|    |   |   |          |           |           |
|----|---|---|----------|-----------|-----------|
| 13 | 1 | 0 | 0.000000 | 2.078026  | 2.758234  |
| 14 | 7 | 0 | 0.000000 | -2.265408 | 1.765140  |
| 15 | 1 | 0 | 0.000000 | -2.078026 | 2.758234  |
| 16 | 1 | 0 | 0.000000 | -3.178600 | 1.343765  |
| 17 | 7 | 0 | 0.000000 | 0.000000  | 1.644070  |
| 18 | 7 | 0 | 0.000000 | 0.000000  | -1.086721 |
| 19 | 8 | 0 | 0.000000 | 0.000000  | 2.941340  |

-----  
**ANTA**

Zero-point correction= 0.077885 (Hartree/Particle)  
Thermal correction to Energy= 0.085428  
Thermal correction to Enthalpy= 0.086372  
Thermal correction to Gibbs Free Energy= 0.044796

**Electronic energy:**

B3LYP = -502.3319039  
W1-F12 = -502.37112720  
W2-F12 = -502.37310281

-----

| Center<br>Number | Atomic<br>Number | Atomic<br>Type | Coordinates (Angstroms) |           |           |
|------------------|------------------|----------------|-------------------------|-----------|-----------|
|                  |                  |                | X                       | Y         | Z         |
| 1                | 6                | 0              | 0.390155                | 0.106711  | -0.001599 |
| 2                | 7                | 0              | 1.823438                | -0.187885 | 0.003707  |
| 3                | 7                | 0              | -0.038864               | 1.343687  | -0.015752 |
| 4                | 7                | 0              | -1.381818               | 1.149263  | -0.018095 |
| 5                | 6                | 0              | -1.667342               | -0.178807 | -0.000234 |
| 6                | 7                | 0              | -0.543973               | -0.868844 | 0.013083  |
| 7                | 8                | 0              | 2.584413                | 0.762019  | 0.036493  |
| 8                | 8                | 0              | 2.138403                | -1.363015 | -0.025595 |
| 9                | 1                | 0              | -1.999275               | 1.941385  | -0.071614 |
| 10               | 7                | 0              | -2.929554               | -0.697365 | -0.057101 |
| 11               | 1                | 0              | -2.962557               | -1.690076 | 0.111642  |
| 12               | 1                | 0              | -3.662189               | -0.182760 | 0.402886  |

-----  
**NTO**

Zero-point correction= 0.065825 (Hartree/Particle)  
Thermal correction to Energy= 0.072892  
Thermal correction to Enthalpy= 0.073836  
Thermal correction to Gibbs Free Energy= 0.033702

**Electronic energy:**

B3LYP = -522.2186539  
W1-F12 = -522.27081546  
W2-F12 = -522.27333393  
-----

| Center<br>Number | Atomic<br>Number | Atomic<br>Type | Coordinates (Angstroms) |           |          |
|------------------|------------------|----------------|-------------------------|-----------|----------|
|                  |                  |                | X                       | Y         | Z        |
| 1                | 6                | 0              | 0.000000                | 0.405289  | 0.000000 |
| 2                | 7                | 0              | 0.810218                | 1.602539  | 0.000000 |
| 3                | 7                | 0              | -1.288370               | 0.395443  | 0.000000 |
| 4                | 7                | 0              | -1.596082               | -0.925137 | 0.000000 |
| 5                | 6                | 0              | -0.489431               | -1.772699 | 0.000000 |
| 6                | 7                | 0              | 0.553688                | -0.839203 | 0.000000 |
| 7                | 8                | 0              | -0.446266               | -2.974953 | 0.000000 |
| 8                | 8                | 0              | 2.020741                | 1.402458  | 0.000000 |
| 9                | 8                | 0              | 0.250682                | 2.677685  | 0.000000 |
| 10               | 1                | 0              | 1.536339                | -1.052290 | 0.000000 |
| 11               | 1                | 0              | -2.557177               | -1.220267 | 0.000000 |

-----

**5-ATZ**

Zero-point correction= 0.063068 (Hartree/Particle)  
Thermal correction to Energy= 0.067975  
Thermal correction to Enthalpy= 0.068919  
Thermal correction to Gibbs Free Energy= 0.035120

**Electronic energy:**

B3LYP = -313.7557239

W1-F12 = -313.76663149

---

| Center<br>Number | Atomic<br>Number | Atomic<br>Type | Coordinates (Angstroms) |           |           |
|------------------|------------------|----------------|-------------------------|-----------|-----------|
|                  |                  |                | X                       | Y         | Z         |
| 1                | 6                | 0              | 0.621357                | -0.043508 | -0.003522 |
| 2                | 7                | 0              | -1.485948               | 0.574839  | 0.004407  |
| 3                | 7                | 0              | -0.120171               | -1.130869 | 0.009688  |
| 4                | 7                | 0              | -1.411133               | -0.699429 | 0.008601  |
| 5                | 7                | 0              | -0.197292               | 1.024435  | -0.005354 |
| 6                | 1                | 0              | 0.000338                | 2.008284  | -0.059131 |
| 7                | 7                | 0              | 1.987750                | 0.003468  | -0.077526 |
| 8                | 1                | 0              | 2.443019                | 0.743010  | 0.432364  |
| 9                | 1                | 0              | 2.416062                | -0.897350 | 0.069181  |

---

**DAT**

Zero-point correction= 0.079926 (Hartree/Particle)

Thermal correction to Energy= 0.086085

Thermal correction to Enthalpy= 0.087029

Thermal correction to Gibbs Free Energy= 0.050269

**Electronic energy:**

B3LYP = -369.1086825

W1-F12 = -369.12026832

W2-F12 = -369.12106271

---

| Center<br>Number | Atomic<br>Number | Atomic<br>Type | Coordinates (Angstroms) |           |           |
|------------------|------------------|----------------|-------------------------|-----------|-----------|
|                  |                  |                | X                       | Y         | Z         |
| 1                | 6                | 0              | -0.224681               | -0.715635 | 0.005140  |
| 2                | 7                | 0              | -0.203895               | 0.631730  | 0.010662  |
| 3                | 7                | 0              | 1.103356                | 1.040522  | 0.003121  |
| 4                | 7                | 0              | 1.798890                | -0.029376 | -0.006850 |
| 5                | 7                | 0              | 1.019212                | -1.149906 | -0.005384 |

---

|    |   |   |           |           |           |
|----|---|---|-----------|-----------|-----------|
| 6  | 7 | 0 | -1.363340 | -1.453563 | 0.065972  |
| 7  | 1 | 0 | -2.208461 | -0.989698 | -0.224160 |
| 8  | 1 | 0 | -1.267533 | -2.415170 | -0.212430 |
| 9  | 7 | 0 | -1.302055 | 1.471692  | -0.014877 |
| 10 | 1 | 0 | -1.327152 | 2.017143  | 0.839472  |
| 11 | 1 | 0 | -1.213949 | 2.103845  | -0.802222 |

-----  
**BTZ**

Zero-point correction= 0.073894 (Hartree/Particle)  
Thermal correction to Energy= 0.080780  
Thermal correction to Enthalpy= 0.081725  
Thermal correction to Gibbs Free Energy= 0.042034

**Electronic energy:**

B3LYP = -515.5413664  
W1-F12 = -515.56636622

-----

| Center<br>Number | Atomic<br>Number | Atomic<br>Type | Coordinates (Angstroms) |           |          |
|------------------|------------------|----------------|-------------------------|-----------|----------|
|                  |                  |                | X                       | Y         | Z        |
| 1                | 6                | 0              | -0.009975               | 0.719456  | 0.000000 |
| 2                | 7                | 0              | 0.672316                | 2.787262  | 0.000000 |
| 3                | 7                | 0              | -1.077572               | 1.488415  | 0.000000 |
| 4                | 7                | 0              | -0.614951               | 2.763199  | 0.000000 |
| 5                | 7                | 0              | 1.077572                | 1.507326  | 0.000000 |
| 6                | 6                | 0              | 0.009975                | -0.719456 | 0.000000 |
| 7                | 7                | 0              | 1.077572                | -1.488415 | 0.000000 |
| 8                | 7                | 0              | -1.077572               | -1.507326 | 0.000000 |
| 9                | 7                | 0              | 0.614951                | -2.763199 | 0.000000 |
| 10               | 7                | 0              | -0.672316               | -2.787262 | 0.000000 |
| 11               | 1                | 0              | -2.053756               | -1.255529 | 0.000000 |
| 12               | 1                | 0              | 2.053756                | 1.255529  | 0.000000 |

-----

**BTO**

Zero-point correction= 0.080937 (Hartree/Particle)  
Thermal correction to Energy= 0.089917  
Thermal correction to Enthalpy= 0.090861  
Thermal correction to Gibbs Free Energy= 0.046544

**Electronic energy:**

B3LYP = -665.9311065

W1-F12 = -665.98965514

---

| Center<br>Number | Atomic<br>Number | Atomic<br>Type | Coordinates (Angstroms) |           |          |
|------------------|------------------|----------------|-------------------------|-----------|----------|
|                  |                  |                | X                       | Y         | Z        |
| 1                | 6                | 0              | -0.012039               | 0.711494  | 0.000000 |
| 2                | 7                | 0              | 0.703994                | 2.766652  | 0.000000 |
| 3                | 7                | 0              | -1.073829               | 1.498533  | 0.000000 |
| 4                | 7                | 0              | -0.597014               | 2.760046  | 0.000000 |
| 5                | 7                | 0              | 1.073829                | 1.492424  | 0.000000 |
| 6                | 6                | 0              | 0.012039                | -0.711494 | 0.000000 |
| 7                | 7                | 0              | 1.073829                | -1.498533 | 0.000000 |
| 8                | 7                | 0              | -1.073829               | -1.492424 | 0.000000 |
| 9                | 7                | 0              | 0.597014                | -2.760046 | 0.000000 |
| 10               | 7                | 0              | -0.703994               | -2.766652 | 0.000000 |
| 11               | 8                | 0              | 2.381718                | 1.131362  | 0.000000 |
| 12               | 8                | 0              | -2.381718               | -1.131362 | 0.000000 |
| 13               | 1                | 0              | 2.371471                | 0.148506  | 0.000000 |
| 14               | 1                | 0              | -2.371471               | -0.148506 | 0.000000 |

---

**Ph-Azs**

Zero-point correction= 0.118288 (Hartree/Particle)  
Thermal correction to Energy= 0.127054  
Thermal correction to Enthalpy= 0.127998  
Thermal correction to Gibbs Free Energy= 0.082104

**Electronic energy:**

B3LYP = -584.6296639

W1-F12 = -584.63103737

W2-F12 = -584.63319377

---

| Center<br>Number | Atomic<br>Number | Atomic<br>Type | Coordinates (Angstroms) |           |          |
|------------------|------------------|----------------|-------------------------|-----------|----------|
|                  |                  |                | X                       | Y         | Z        |
| 1                | 6                | 0              | -1.051753               | 2.522444  | 0.000000 |
| 2                | 7                | 0              | 0.978235                | 1.513353  | 0.000000 |
| 3                | 7                | 0              | -1.223854               | 1.170458  | 0.000000 |
| 4                | 7                | 0              | 0.000000                | 0.677564  | 0.000000 |
| 5                | 8                | 0              | 0.394192                | 2.715039  | 0.000000 |
| 6                | 8                | 0              | -1.803212               | 3.443566  | 0.000000 |
| 7                | 6                | 0              | 0.242871                | -0.734506 | 0.000000 |
| 8                | 6                | 0              | -0.849059               | -1.591001 | 0.000000 |
| 9                | 6                | 0              | 1.550893                | -1.205715 | 0.000000 |
| 10               | 6                | 0              | -0.618241               | -2.959814 | 0.000000 |
| 11               | 1                | 0              | -1.847244               | -1.183009 | 0.000000 |
| 12               | 6                | 0              | 1.760520                | -2.575463 | 0.000000 |
| 13               | 1                | 0              | 2.378853                | -0.514192 | 0.000000 |
| 14               | 6                | 0              | 0.680445                | -3.453293 | 0.000000 |
| 15               | 1                | 0              | -1.458715               | -3.639242 | 0.000000 |
| 16               | 1                | 0              | 2.771538                | -2.957394 | 0.000000 |
| 17               | 1                | 0              | 0.853007                | -4.520531 | 0.000000 |

---

**Tol-Azs**

Zero-point correction= 0.145045 (Hartree/Particle)

Thermal correction to Energy= 0.155734

Thermal correction to Enthalpy= 0.156678

Thermal correction to Gibbs Free Energy= 0.105981

**Electronic energy:**

B3LYP = -623.9300195

W1-F12 = -623.96032703

---



| Center<br>Number | Atomic<br>Number | Atomic<br>Type | Coordinates (Angstroms) |           |           |
|------------------|------------------|----------------|-------------------------|-----------|-----------|
|                  |                  |                | X                       | Y         | Z         |
| 1                | 6                | 0              | 3.159197                | -0.416976 | 0.003214  |
| 2                | 7                | 0              | 1.707800                | 1.322982  | 0.000542  |
| 3                | 7                | 0              | 1.883798                | -0.898563 | 0.000708  |
| 4                | 7                | 0              | 1.119679                | 0.178342  | -0.000245 |
| 5                | 8                | 0              | 3.013430                | 1.031933  | 0.002233  |
| 6                | 8                | 0              | 4.229482                | -0.936545 | 0.003507  |
| 7                | 6                | 0              | -0.310977               | 0.088027  | -0.001691 |
| 8                | 6                | 0              | -0.899854               | -1.168051 | -0.005192 |
| 9                | 6                | 0              | -1.078830               | 1.248684  | -0.003325 |
| 10               | 6                | 0              | -2.285156               | -1.256357 | -0.008340 |
| 11               | 1                | 0              | -0.279535               | -2.050728 | -0.007560 |
| 12               | 6                | 0              | -2.457797               | 1.133703  | -0.006452 |
| 13               | 1                | 0              | -0.603969               | 2.217902  | -0.004406 |
| 14               | 6                | 0              | -3.087359               | -0.115806 | -0.006706 |
| 15               | 1                | 0              | -2.747192               | -2.234808 | -0.014125 |
| 16               | 1                | 0              | -3.058476               | 2.034107  | -0.010830 |
| 17               | 6                | 0              | -4.587578               | -0.217918 | 0.013204  |
| 18               | 1                | 0              | -5.042711               | 0.496898  | -0.673098 |
| 19               | 1                | 0              | -4.922895               | -1.216686 | -0.262028 |
| 20               | 1                | 0              | -4.977325               | -0.000943 | 1.010809  |

**ANF**

Zero-point correction= 0.064986 (Hartree/Particle)  
 Thermal correction to Energy= 0.072228  
 Thermal correction to Enthalpy= 0.073172  
 Thermal correction to Gibbs Free Energy= 0.032759

**Electronic energy:**

B3LYP = -522.1313267  
 W1-F12 = -522.18429138  
 W2-F12 = -522.18662923

| Center Number | Atomic Number | Atomic Type | Coordinates (Angstroms) |           |           |
|---------------|---------------|-------------|-------------------------|-----------|-----------|
|               |               |             | X                       | Y         | Z         |
| 1             | 7             | 0           | -0.399843               | -1.512225 | 0.013474  |
| 2             | 6             | 0           | -0.948597               | 0.661566  | -0.012223 |
| 3             | 6             | 0           | 0.101506                | -0.313363 | -0.005824 |
| 4             | 8             | 0           | -1.723255               | -1.342687 | 0.020516  |
| 5             | 7             | 0           | -2.083778               | 0.004094  | 0.006910  |
| 6             | 7             | 0           | 1.523739                | -0.074013 | 0.001471  |
| 7             | 8             | 0           | 2.279237                | -1.018164 | -0.049137 |
| 8             | 8             | 0           | 1.851188                | 1.111308  | 0.063798  |
| 9             | 7             | 0           | -0.838049               | 2.003100  | -0.072881 |
| 10            | 1             | 0           | -1.658431               | 2.559929  | 0.086531  |
| 11            | 1             | 0           | 0.069147                | 2.400499  | 0.097524  |

**DAF**

Zero-point correction= 0.079131 (Hartree/Particle)  
 Thermal correction to Energy= 0.085284  
 Thermal correction to Enthalpy= 0.086228  
 Thermal correction to Gibbs Free Energy= 0.049486

**Electronic energy:**

B3LYP = -372.9392806  
 W1-F12 = -372.95526847  
 W2-F12 = -372.95645727

| Center Number | Atomic Number | Atomic Type | Coordinates (Angstroms) |           |           |
|---------------|---------------|-------------|-------------------------|-----------|-----------|
|               |               |             | X                       | Y         | Z         |
| 1             | 6             | 0           | 0.231554                | -0.717313 | 0.000554  |
| 2             | 6             | 0           | 0.232208                | 0.717082  | -0.000590 |
| 3             | 7             | 0           | -0.997289               | -1.135845 | 0.000758  |
| 4             | 8             | 0           | -1.778941               | 0.000760  | 0.000469  |

|    |   |   |           |           |           |
|----|---|---|-----------|-----------|-----------|
| 5  | 7 | 0 | -0.996240 | 1.136716  | -0.001169 |
| 6  | 7 | 0 | 1.351195  | -1.523594 | 0.069227  |
| 7  | 1 | 0 | 1.142611  | -2.506602 | -0.024934 |
| 8  | 1 | 0 | 2.094449  | -1.239753 | -0.552811 |
| 9  | 7 | 0 | 1.352587  | 1.522372  | -0.069260 |
| 10 | 1 | 0 | 1.144782  | 2.505645  | 0.023949  |
| 11 | 1 | 0 | 2.095337  | 1.238481  | 0.553364  |

-----  
**DNAF**

Zero-point correction= 0.084625 (Hartree/Particle)  
Thermal correction to Energy= 0.095204  
Thermal correction to Enthalpy= 0.096148  
Thermal correction to Gibbs Free Energy= 0.047456

**Electronic energy:**

B3LYP = -782.0629457  
W1-F12 = -782.15339585

-----

| Center<br>Number | Atomic<br>Number | Atomic<br>Type | Coordinates (Angstroms) |           |           |
|------------------|------------------|----------------|-------------------------|-----------|-----------|
|                  |                  |                | X                       | Y         | Z         |
| 1                | 6                | 0              | -0.042924               | 0.717420  | 0.962926  |
| 2                | 6                | 0              | 0.042924                | -0.717420 | 0.962926  |
| 3                | 7                | 0              | -0.064128               | 1.121556  | 2.201552  |
| 4                | 8                | 0              | 0.000000                | 0.000000  | 2.968867  |
| 5                | 7                | 0              | 0.064128                | -1.121556 | 2.201552  |
| 6                | 7                | 0              | 0.000000                | 1.655704  | -0.052384 |
| 7                | 1                | 0              | 0.212843                | 2.613962  | 0.184917  |
| 8                | 7                | 0              | 0.000000                | -1.655704 | -0.052384 |
| 9                | 1                | 0              | -0.212843               | -2.613962 | 0.184917  |
| 10               | 7                | 0              | -0.875540               | 1.576959  | -1.136368 |
| 11               | 8                | 0              | -0.928723               | 2.570844  | -1.826177 |
| 12               | 8                | 0              | -1.460638               | 0.525258  | -1.289766 |
| 13               | 7                | 0              | 0.875540                | -1.576959 | -1.136368 |

|    |   |   |          |           |           |
|----|---|---|----------|-----------|-----------|
| 14 | 8 | 0 | 0.928723 | -2.570844 | -1.826177 |
| 15 | 8 | 0 | 1.460638 | -0.525258 | -1.289766 |

-----  
**DAAzF**

Zero-point correction= 0.113970 (Hartree/Particle)

Thermal correction to Energy= 0.125634

Thermal correction to Enthalpy= 0.126578

Thermal correction to Gibbs Free Energy= 0.076102

**Electronic energy:**

B3LYP = -743.4078607

W1-F12 = -743.44465733

-----

| Center<br>Number | Atomic<br>Number | Atomic<br>Type | Coordinates (Angstroms) |           |           |
|------------------|------------------|----------------|-------------------------|-----------|-----------|
|                  |                  |                | X                       | Y         | Z         |
| 1                | 7                | 0              | -1.453287               | 2.456132  | -0.050502 |
| 2                | 7                | 0              | -0.546269               | 0.317300  | -0.004094 |
| 3                | 7                | 0              | 0.546269                | -0.317300 | -0.004094 |
| 4                | 7                | 0              | 1.453287                | -2.456132 | -0.050502 |
| 5                | 6                | 0              | 0.783137                | 2.523712  | 0.024927  |
| 6                | 6                | 0              | -0.783137               | -2.523712 | 0.024927  |
| 7                | 6                | 0              | -0.393885               | 1.687040  | -0.006057 |
| 8                | 6                | 0              | 0.393885                | -1.687040 | -0.006057 |
| 9                | 7                | 0              | 2.066269                | 2.118624  | 0.111137  |
| 10               | 1                | 0              | 2.257568                | 1.140190  | -0.015847 |
| 11               | 1                | 0              | 2.800384                | 2.794043  | -0.003363 |
| 12               | 7                | 0              | 0.393885                | 3.772231  | -0.009191 |
| 13               | 8                | 0              | -1.002586               | 3.713212  | -0.053183 |
| 14               | 8                | 0              | 1.002586                | -3.713212 | -0.053183 |
| 15               | 7                | 0              | -2.066269               | -2.118624 | 0.111137  |
| 16               | 1                | 0              | -2.257568               | -1.140190 | -0.015847 |
| 17               | 1                | 0              | -2.800384               | -2.794043 | -0.003363 |
| 18               | 7                | 0              | -0.393885               | -3.772231 | -0.009191 |

-----  
**DAAF**

Zero-point correction= 0.119410 (Hartree/Particle)  
Thermal correction to Energy= 0.131463  
Thermal correction to Enthalpy= 0.132407  
Thermal correction to Gibbs Free Energy= 0.079994

**Electronic energy:**

B3LYP = -818.6159881  
W1-F12 = -818.67080523  
-----

| Center<br>Number | Atomic<br>Number | Atomic<br>Type | Coordinates (Angstroms) |           |           |
|------------------|------------------|----------------|-------------------------|-----------|-----------|
|                  |                  |                | X                       | Y         | Z         |
| 1                | 7                | 0              | -2.631574               | -1.321278 | -0.287926 |
| 2                | 7                | 0              | -0.390923               | -0.543388 | -0.234240 |
| 3                | 7                | 0              | 0.292997                | 0.519008  | -0.043320 |
| 4                | 7                | 0              | 2.311461                | 1.530076  | -0.435399 |
| 5                | 6                | 0              | -2.513626               | 0.864593  | 0.202123  |
| 6                | 6                | 0              | 2.648241                | -0.568824 | 0.262173  |
| 7                | 6                | 0              | -1.797241               | -0.341655 | -0.104398 |
| 8                | 6                | 0              | 1.670727                | 0.436427  | -0.098857 |
| 9                | 7                | 0              | -2.017953               | 2.083237  | 0.497434  |
| 10               | 1                | 0              | -1.045445               | 2.245136  | 0.298640  |
| 11               | 1                | 0              | -2.653258               | 2.860913  | 0.521431  |
| 12               | 7                | 0              | -3.790501               | 0.566240  | 0.187693  |
| 13               | 8                | 0              | -3.847118               | -0.791694 | -0.112455 |
| 14               | 8                | 0              | 3.618490                | 1.250037  | -0.339651 |
| 15               | 7                | 0              | 2.444619                | -1.794872 | 0.815449  |
| 16               | 1                | 0              | 1.620009                | -2.274687 | 0.482976  |
| 17               | 1                | 0              | 3.273914                | -2.360621 | 0.903062  |
| 18               | 7                | 0              | 3.835733                | -0.048957 | 0.090940  |
| 19               | 8                | 0              | 0.026023                | -1.676398 | -0.536239 |

-----

**34-MNF**

Zero-point correction= 0.079466 (Hartree/Particle)  
Thermal correction to Energy= 0.088149  
Thermal correction to Enthalpy= 0.089093  
Thermal correction to Gibbs Free Energy= 0.044562

**Electronic energy:**

B3LYP = -581.2789124  
W1-F12 = -581.33433187  
W2-F12 = -581.33730925

---

| Center<br>Number | Atomic<br>Number | Atomic<br>Type | Coordinates (Angstroms) |           |           |
|------------------|------------------|----------------|-------------------------|-----------|-----------|
|                  |                  |                | X                       | Y         | Z         |
| 1                | 6                | 0              | 0.000000                | 0.562771  | 0.000000  |
| 2                | 6                | 0              | -0.136516               | -0.846341 | 0.000000  |
| 3                | 7                | 0              | 1.230911                | 0.972603  | 0.000000  |
| 4                | 8                | 0              | 1.998711                | -0.121481 | 0.000000  |
| 5                | 7                | 0              | 1.105645                | -1.315578 | 0.000000  |
| 6                | 7                | 0              | -1.089539               | 1.533169  | 0.000000  |
| 7                | 8                | 0              | -0.804904               | 2.709470  | 0.000000  |
| 8                | 8                | 0              | -2.215221               | 1.054413  | 0.000000  |
| 9                | 6                | 0              | -1.307727               | -1.758349 | 0.000000  |
| 10               | 1                | 0              | -1.928564               | -1.583642 | 0.877222  |
| 11               | 1                | 0              | -1.928564               | -1.583642 | -0.877222 |
| 12               | 1                | 0              | -0.959200               | -2.788424 | 0.000000  |
| 13               | 8                | 0              | 1.615496                | -2.407917 | 0.000000  |

---

**34-MNF**

Zero-point correction= 0.079613 (Hartree/Particle)  
Thermal correction to Energy= 0.088085  
Thermal correction to Enthalpy= 0.089029  
Thermal correction to Gibbs Free Energy= 0.045297

**Electronic energy:**

B3LYP = -581.2766975

W1-F12 = -581.33107150

W2-F12 = -581.33409331

| Center<br>Number | Atomic<br>Number | Atomic<br>Type | Coordinates (Angstroms) |   |   |
|------------------|------------------|----------------|-------------------------|---|---|
|                  |                  |                | X                       | Y | Z |

|    |   |   |           |           |           |
|----|---|---|-----------|-----------|-----------|
| 1  | 6 | 0 | 0.000000  | 0.132988  | 0.000000  |
| 2  | 6 | 0 | -0.691557 | -1.111380 | 0.000000  |
| 3  | 7 | 0 | 1.317808  | -0.108332 | 0.000000  |
| 4  | 8 | 0 | 1.430745  | -1.544315 | 0.000000  |
| 5  | 7 | 0 | 0.168532  | -2.085653 | 0.000000  |
| 6  | 8 | 0 | 2.319714  | 0.545654  | 0.000000  |
| 7  | 7 | 0 | -0.530314 | 1.462992  | 0.000000  |
| 8  | 8 | 0 | 0.246700  | 2.398462  | 0.000000  |
| 9  | 8 | 0 | -1.754188 | 1.538248  | 0.000000  |
| 10 | 6 | 0 | -2.153714 | -1.370655 | 0.000000  |
| 11 | 1 | 0 | -2.621874 | -0.924091 | 0.875657  |
| 12 | 1 | 0 | -2.621874 | -0.924091 | -0.875657 |
| 13 | 1 | 0 | -2.320557 | -2.444971 | 0.000000  |

#### 34-CNF

Zero-point correction= 0.050100 (Hartree/Particle)

Thermal correction to Energy= 0.058863

Thermal correction to Enthalpy= 0.059807

Thermal correction to Gibbs Free Energy= 0.014835

#### Electronic energy:

B3LYP = -634.1967524

W1-F12 = -634.26511485

W2-F12 = -634.26807240

| Center<br>Number | Atomic<br>Number | Atomic<br>Type | Coordinates (Angstroms) |   |   |
|------------------|------------------|----------------|-------------------------|---|---|
|                  |                  |                | X                       | Y | Z |

|    |   |   |           |           |          |
|----|---|---|-----------|-----------|----------|
| 1  | 6 | 0 | -0.115135 | -0.712835 | 0.000000 |
| 2  | 6 | 0 | 0.000000  | 0.701210  | 0.000000 |
| 3  | 7 | 0 | -1.340085 | -1.120915 | 0.000000 |
| 4  | 8 | 0 | -2.121183 | -0.028084 | 0.000000 |
| 5  | 7 | 0 | -1.256997 | 1.172601  | 0.000000 |
| 6  | 7 | 0 | 0.993645  | -1.668069 | 0.000000 |
| 7  | 8 | 0 | 0.717205  | -2.845409 | 0.000000 |
| 8  | 8 | 0 | 2.103155  | -1.163675 | 0.000000 |
| 9  | 6 | 0 | 1.102658  | 1.573121  | 0.000000 |
| 10 | 7 | 0 | 1.978016  | 2.320622  | 0.000000 |
| 11 | 8 | 0 | -1.767576 | 2.249837  | 0.000000 |

-----  
**BTF**

Zero-point correction= 0.086722 (Hartree/Particle)  
Thermal correction to Energy= 0.099321  
Thermal correction to Enthalpy= 0.100265  
Thermal correction to Gibbs Free Energy= 0.047555

**Electronic energy:**

B3LYP = -1008.4731726  
W1-F12 = -1008.56090455

-----

| Center<br>Number | Atomic<br>Number | Atomic<br>Type | Coordinates (Angstroms) |           |          |
|------------------|------------------|----------------|-------------------------|-----------|----------|
|                  |                  |                | X                       | Y         | Z        |
| 1                | 6                | 0              | 0.000000                | 1.416690  | 0.000000 |
| 2                | 6                | 0              | -1.249528               | 0.726628  | 0.000000 |
| 3                | 6                | 0              | -1.227001               | -0.708444 | 0.000000 |
| 4                | 6                | 0              | -0.004595               | -1.445476 | 0.000000 |
| 5                | 6                | 0              | 1.226956                | -0.708607 | 0.000000 |
| 6                | 6                | 0              | 1.253981                | 0.718701  | 0.000000 |
| 7                | 7                | 0              | -0.213745               | -2.731929 | 0.000000 |
| 8                | 7                | 0              | 2.481887                | -1.133838 | 0.000000 |
| 9                | 7                | 0              | 2.472840                | 1.180517  | 0.000000 |



|    |   |   |           |           |          |
|----|---|---|-----------|-----------|----------|
| 10 | 7 | 0 | -0.258867 | 2.716079  | 0.000000 |
| 11 | 7 | 0 | -2.259028 | 1.550994  | 0.000000 |
| 12 | 7 | 0 | -2.222961 | -1.582222 | 0.000000 |
| 13 | 8 | 0 | -1.743141 | 2.804212  | 0.000000 |
| 14 | 8 | 0 | -1.557037 | -2.911656 | 0.000000 |
| 15 | 8 | 0 | 3.299796  | 0.107800  | 0.000000 |
| 16 | 8 | 0 | 3.036786  | -2.196750 | 0.000000 |
| 17 | 8 | 0 | -3.420890 | -1.530768 | 0.000000 |
| 18 | 8 | 0 | 0.384515  | 3.727892  | 0.000000 |

-----  
**NNFF**

Zero-point correction= 0.079347 (Hartree/Particle)  
Thermal correction to Energy= 0.092632  
Thermal correction to Enthalpy= 0.093576  
Thermal correction to Gibbs Free Energy= 0.035993

**Electronic energy:**

B3LYP = -1007.4629609  
W1-F12 = -1007.58855748

-----

| Center<br>Number | Atomic<br>Number | Atomic<br>Type | Coordinates (Angstroms) |           |           |
|------------------|------------------|----------------|-------------------------|-----------|-----------|
|                  |                  |                | X                       | Y         | Z         |
| 1                | 7                | 0              | 0.556437                | 1.629179  | -0.714607 |
| 2                | 7                | 0              | -0.550431               | -1.571494 | -1.309883 |
| 3                | 6                | 0              | 1.907934                | 0.090089  | 0.065421  |
| 4                | 6                | 0              | -1.880608               | -0.406847 | -0.003161 |
| 5                | 6                | 0              | 0.591850                | 0.339058  | -0.384216 |
| 6                | 6                | 0              | -0.571158               | -0.512048 | -0.550324 |
| 7                | 7                | 0              | 2.662626                | 1.140011  | 0.032383  |
| 8                | 8                | 0              | 1.907583                | 2.147531  | -0.439614 |
| 9                | 8                | 0              | -1.801102               | -2.114352 | -1.222169 |
| 10               | 7                | 0              | -2.614083               | -1.389303 | -0.422023 |
| 11               | 7                | 0              | -2.385019               | 0.586079  | 0.938820  |

|    |   |   |           |           |           |
|----|---|---|-----------|-----------|-----------|
| 12 | 8 | 0 | -3.574902 | 0.612168  | 1.150392  |
| 13 | 8 | 0 | -1.529883 | 1.300702  | 1.438295  |
| 14 | 7 | 0 | 2.413405  | -1.170651 | 0.608555  |
| 15 | 8 | 0 | 3.611098  | -1.334807 | 0.623883  |
| 16 | 8 | 0 | 1.554338  | -1.938509 | 1.010008  |
| 17 | 8 | 0 | -0.275714 | 2.373736  | -1.148174 |

-----  
**DNBF**

Zero-point correction= 0.083177 (Hartree/Particle)

Thermal correction to Energy= 0.097451

Thermal correction to Enthalpy= 0.098395

Thermal correction to Gibbs Free Energy= 0.040222

**Electronic energy:**

B3LYP = -1082.6645102

W1-F12 = -1082.80078235

-----

|    |   |   |           |           |           |
|----|---|---|-----------|-----------|-----------|
| 1  | 7 | 0 | 1.240654  | 1.206632  | 0.878017  |
| 2  | 7 | 0 | -1.240654 | -1.206632 | 0.878017  |
| 3  | 6 | 0 | -0.596630 | 1.824535  | -0.149138 |
| 4  | 6 | 0 | 0.596630  | -1.824535 | -0.149138 |
| 5  | 6 | 0 | 0.132717  | 0.707531  | 0.323126  |
| 6  | 6 | 0 | -0.132717 | -0.707531 | 0.323126  |
| 7  | 7 | 0 | -0.001753 | 2.951052  | 0.073497  |
| 8  | 8 | 0 | 1.151824  | 2.664487  | 0.702286  |
| 9  | 8 | 0 | -1.151824 | -2.664487 | 0.702286  |
| 10 | 7 | 0 | 0.001753  | -2.951052 | 0.073497  |
| 11 | 7 | 0 | 1.861338  | -1.783017 | -0.881500 |
| 12 | 8 | 0 | 2.444310  | -2.826253 | -1.058682 |
| 13 | 8 | 0 | 2.199885  | -0.672452 | -1.260194 |
| 14 | 7 | 0 | -1.861338 | 1.783017  | -0.881500 |
| 15 | 8 | 0 | -2.444310 | 2.826253  | -1.058682 |
| 16 | 8 | 0 | -2.199885 | 0.672452  | -1.260194 |
| 17 | 8 | 0 | -2.199885 | -0.744020 | 1.424837  |

18      8      0      2.199885   0.744020   1.424837

---

## References

- [1] H.-H. Emons, R. Naumann, K. Jahn, H.-J. Flammersheim, Thermal properties of acetamide in the temperature range from 298 K to 400 K, *Thermochim. Acta.* 104 (1986) 127–137. [https://doi.org/10.1016/0040-6031\(86\)85191-7](https://doi.org/10.1016/0040-6031(86)85191-7).
- [2] M. Davies, A.H. Jones, G.H. Thomas, The lattice energies of the straight-chain primary amides, *Trans. Faraday Soc.* 55 (1959) 1100. <https://doi.org/10.1039/tf9595501100>.
- [3] H.G.M. De Wit, C.G. De Kruif, J.C. Van Miltenburg, Thermodynamic properties of molecular organic crystals containing nitrogen, oxygen, and sulfur II. Molar heat capacities of eight compounds by adiabatic calorimetry, *J. Chem. Thermodyn.* 15 (1983) 891–902. [https://doi.org/10.1016/0021-9614\(83\)90095-2](https://doi.org/10.1016/0021-9614(83)90095-2).
- [4] P.J. Linstrom, W.G. Mallard, eds., NIST Chemistry WebBook, NIST Standard Reference Database Number 69, National Institute of Standards and Technology, Gaithersburg MD, n.d. <http://webbook.nist.gov> (accessed September 14, 2016).
- [5] M.J. O’Neil, ed., *The Merck index: an encyclopedia of chemicals, drugs, and biologicals*, 14th ed, Merck, Whitehouse Station, N.J, 2006.
- [6] B.L. Sharma, R. Kant, R. Sharma, S. Tandon, Deviations of binary organic eutectic melt systems, *Mater. Chem. Phys.* 82 (2003) 216–224. [https://doi.org/10.1016/S0254-0584\(03\)00199-8](https://doi.org/10.1016/S0254-0584(03)00199-8).
- [7] P. Pacor, Applicability of the du pont 900 DTA apparatus in quantitative differential thermal analysis, *Anal. Chim. Acta.* 37 (1967) 200–208. [https://doi.org/10.1016/S0003-2670\(01\)80660-7](https://doi.org/10.1016/S0003-2670(01)80660-7).
- [8] G.T. Furukawa, R.E. McCoskey, G.J. King, Calorimetric properties of benzoic acid from 0 to 410K, *J. Res. Natl. Bur. Stand.* 47 (1951) 256–261.
- [9] K. Khimeche, A. Dahmani, Solid–Liquid Equilibria of Naphthalene + Alkanediamine Mixtures, *J. Chem. Eng. Data.* 51 (2006) 382–385. <https://doi.org/10.1021/je0502851>.
- [10] D.J. David, Determination of Specific Heat and Heat of Fusion by Differential Thermal Analysis. Study of Theory and Operating Parameters., *Anal. Chem.* 36 (1964) 2162–2166. <https://doi.org/10.1021/ac60217a038>.
- [11] B.J. Mair, Muthu. Shamaingar, N.C. Krouskop, F.D. Rossini, Isolation of Adamantane from Petroleum, *Anal. Chem.* 31 (1959) 2082–2083. <https://doi.org/10.1021/ac60156a063>.
- [12] G.J. Kabo, A.V. Blokhin, M.B. Charapennikau, A.G. Kabo, V.M. Sevruk, Thermodynamic properties of adamantane and the energy states of molecules in plastic crystals for some cage hydrocarbons, *Thermochim. Acta.* 345 (2000) 125–133. [https://doi.org/10.1016/S0040-6031\(99\)00393-7](https://doi.org/10.1016/S0040-6031(99)00393-7).
- [13] J.T.S. Andrews, R.E. Carpenter, T.M. Martinko, R.C. Fort, T.A. Flood, M.G. Adlington, Transition and Fusion Thermodynamics of Heteroadamantanes, *Mol. Cryst. Liq. Cryst.* 41 (1978) 257–261. <https://doi.org/10.1080/00268947808070312>.
- [14] J. Chickos, D. Hesse, S. Hosseini, G. Nichols, P. Webb, Sublimation enthalpies at 298.15K using correlation gas chromatography and differential scanning calorimetry measurements, *Thermochim. Acta.* 313 (1998) 101–110. [https://doi.org/10.1016/S0040-6031\(97\)00432-2](https://doi.org/10.1016/S0040-6031(97)00432-2).
- [15] Z. Lisicki, M.E. Jamróz, (Solid + liquid) equilibria in (polynuclear aromatic+ tertiary amide) systems, *J. Chem. Thermodyn.* 32 (2000) 1335–1353. <https://doi.org/10.1006/jcht.2000.0685>.

- [16] A. Rojas, E. Orozco, Measurement of the enthalpies of vaporization and sublimation of solids aromatic hydrocarbons by differential scanning calorimetry, *Thermochim. Acta.* 405 (2003) 93–107. [https://doi.org/10.1016/S0040-6031\(03\)00139-4](https://doi.org/10.1016/S0040-6031(03)00139-4).
- [17] J.R. Donnelly, L.A. Drewes, R.L. Johnson, W.D. Munslow, K.K. Knapp, G.W. Sovocool, Purity and heat of fusion data for environmental standards as determined by differential scanning calorimetry, *Thermochim. Acta.* 167 (1990) 155–187. [https://doi.org/10.1016/0040-6031\(90\)80476-F](https://doi.org/10.1016/0040-6031(90)80476-F).
- [18] A. Cingolani, G. Berchiesi, Thermodynamic properties of organic compounds: Note I. A DSC study of phase transitions in aliphatic dicarboxylic acids, *J. Therm. Anal.* 6 (1974) 87–90. <https://doi.org/10.1007/BF01911490>.
- [19] W.V. Steele, R.D. Chirico, S.E. Knipmeyer, A. Nguyen, N.K. Smith, Thermodynamic Properties and Ideal-Gas Enthalpies of Formation for Butyl Vinyl Ether, 1,2-Dimethoxyethane, Methyl Glycolate, Bicyclo[2.2.1]hept-2-ene, 5-Vinylbicyclo[2.2.1]hept-2-ene, *trans* -Azobenzene, Butyl Acrylate, Di- *tert* -butyl Ether, and Hexane-1,6-diol, *J. Chem. Eng. Data.* 41 (1996) 1285–1302. <https://doi.org/10.1021/je960117w>.
- [20] F.-W. Schulze, H.-J. Petrick, H.K. Cammenga, H. Klinge, Thermodynamic Properties of the Structural Analogues Benzo[c]cinnoline, *Trans*-azobenzene, and *Cis*-azobenzene, *Z. Für Phys. Chem.* 107 (1977) 1–19. <https://doi.org/10.1524/zpch.1977.107.1.001>.
- [21] E. Suzuki, K. Shimomura, K. Sekiguchi, Thermochemical study of theophylline and its hydrate., *Chem. Pharm. Bull. (Tokyo).* 37 (1989) 493–497. <https://doi.org/10.1248/cpb.37.493>.
- [22] J.G. Fokkens, J.G.M. van Amelsfoort, C.J. de Blaey, C.G. de Kruijff, J. Wilting, A thermodynamic study of the solubility of theophylline and its hydrate, *Int. J. Pharm.* 14 (1983) 79–93. [https://doi.org/10.1016/0378-5173\(83\)90116-3](https://doi.org/10.1016/0378-5173(83)90116-3).
- [23] T. Sánchez-Bulás, O. Cruz-Vásquez, J. Hernández-Obregón, A. Rojas, Enthalpies of fusion, vaporisation and sublimation of crown ethers determined by thermogravimetry and differential scanning calorimetry, *Thermochim. Acta.* 650 (2017) 123–133. <https://doi.org/10.1016/j.tca.2016.03.013>.
- [24] G. Nichols, J. Orf, S.M. Reiter, J. Chickos, G.W. Gokel, The vaporization enthalpies of some crown and polyethers by correlation gas chromatography, *Thermochim. Acta.* 346 (2000) 15–28. [https://doi.org/10.1016/S0040-6031\(99\)00405-0](https://doi.org/10.1016/S0040-6031(99)00405-0).
- [25] A. Bianchi, J. Giusti, P. Paoletti, Analysis by differential scanning calorimetry of the KNCS/dibenzo-18-crown-6 system: Phase diagram and enthalpy changes, *Thermochim. Acta.* 90 (1985) 109–114. [https://doi.org/10.1016/0040-6031\(85\)87088-X](https://doi.org/10.1016/0040-6031(85)87088-X).
- [26] A. Finch, P.J. Gardner, A.J. Head, X. Wu, The enthalpy of formation of 4-nitrophenyl azide, *Thermochim. Acta.* 298 (1997) 191–194. [https://doi.org/10.1016/S0040-6031\(97\)00192-5](https://doi.org/10.1016/S0040-6031(97)00192-5).
- [27] A.E. Fogelzang, V.Yu. Egorshv, V.P. Sinditsky, M.D. Dutov, Combustion of nitro derivatives of azidobenzenes and benzofuroxans, *Combust. Flame.* 87 (1991) 123–135. [https://doi.org/10.1016/0010-2180\(91\)90162-5](https://doi.org/10.1016/0010-2180(91)90162-5).
- [28] D.-R. Hwang, M. Tamura, T. Yoshida, N. Tanaka, F. Hosoya, Estimation of  $\Delta_f$  of nitro derivatives of benzene and toluene using AM1 and DSC, *J. Energ. Mater.* 8 (1990) 85–98. <https://doi.org/10.1080/07370659008017247>.
- [29] C. Lenchitz, R.W. Velicky, G. Silvestro, L.P. Schlosberg, Thermodynamic properties of several nitrotoluenes, *J. Chem. Thermodyn.* 3 (1971) 689–692. [https://doi.org/10.1016/S0021-9614\(71\)80090-3](https://doi.org/10.1016/S0021-9614(71)80090-3).
- [30] W.E. Acree, Thermodynamic properties of organic compounds: enthalpy of fusion and melting point temperature compilation, *Thermochim. Acta.* 189 (1991) 37–56. [https://doi.org/10.1016/0040-6031\(91\)87098-H](https://doi.org/10.1016/0040-6031(91)87098-H).

- [31] H. Takahashi, R. Tamura, Low temperature phase transition induced biaxial negative thermal expansion of 2,4-dinitroanisole, *CrystEngComm*. 17 (2015) 8888–8896. <https://doi.org/10.1039/C5CE00029G>.
- [32] F.M. Beringer, A. Brierley, M. Drexler, E.M. Gindler, C.C. Lumpkin, Diaryliodonium Salts. II. The Phenylation of Organic and Inorganic Bases<sup>1,2</sup>, *J. Am. Chem. Soc.* 75 (1953) 2708–2712. <https://doi.org/10.1021/ja01107a047>.
- [33] X. Xing, F. Zhao, S. Ma, K. Xu, L. Xiao, H. Gao, T. An, R. Hu, Specific Heat Capacity, Thermal Behavior, and Thermal Hazard of 2,4-Dinitroanisole, *Propellants Explos. Pyrotech.* 37 (2012) 179–182. <https://doi.org/10.1002/prop.201000077>.
- [34] N.V. Muravyev, K.A. Monogarov, A.A. Bragin, I.V. Fomenkov, A.N. Pivkina, HP-DSC study of energetic materials. Part I. Overview of pressure influence on thermal behavior, *Thermochim. Acta.* 631 (2016) 1–7. <https://doi.org/10.1016/j.tca.2016.03.018>.
- [35] E.G. Kayser, Analysis methods for explosive materials–I. polynitro compounds, *J. Energ. Mater.* 1 (1983) 251–273. <https://doi.org/10.1080/07370658308010621>.
- [36] G. Edwards, The vapour pressure of 2 : 4 : 6-trinitrotoluene, *Trans. Faraday Soc.* 46 (1950) 423. <https://doi.org/10.1039/tf9504600423>.
- [37] W.E. Garner, C.L. Abernethy, Heats of Combustion and Formation of Nitro-Compounds. Part I. Benzene, Toluene, Phenol and Methylaniline Series, *Proc. R. Soc. Math. Phys. Eng. Sci.* 99 (1921) 213–235. <https://doi.org/10.1098/rspa.1921.0036>.
- [38] P.G. Hall, Thermal decomposition and phase transitions in solid nitramines, *Trans. Faraday Soc.* 67 (1971) 556. <https://doi.org/10.1039/tf9716700556>.
- [39] G. Krien, H.H. Licht, J. Zierath, Thermochemische untersuchungen an nitraminen, *Thermochim. Acta.* 6 (1973) 465–472. [https://doi.org/10.1016/0040-6031\(73\)85078-6](https://doi.org/10.1016/0040-6031(73)85078-6).
- [40] V.G. Kiselev, N.V. Muravyev, K.A. Monogarov, P.S. Gribanov, A.F. Asachenko, I.V. Fomenkov, C.F. Goldsmith, A.N. Pivkina, N.P. Gritsan, Toward reliable characterization of energetic materials: interplay of theory and thermal analysis in the study of the thermal stability of tetranitroacetimidic acid (TNAA), *Phys. Chem. Chem. Phys.* 20 (2018) 29285–29298. <https://doi.org/10.1039/C8CP05619F>.
- [41] T.T. Vo, D.A. Parrish, J.M. Shreeve, Tetranitroacetimidic Acid: A High Oxygen Oxidizer and Potential Replacement for Ammonium Perchlorate, *J. Am. Chem. Soc.* 136 (2014) 11934–11937. <https://doi.org/10.1021/ja5074036>.
- [42] L.V. Kustova, E.P. Kirpichev, Yu.I. Rubtsov, V.V. Avdonin, A.G. Koperin, L.T. Eremenko, Standard Enthalpies of Formation of Certain Nitro Compounds, *Bull. Acad. Sci. USSR Div. Chem. Sci.* (1981) 1830–1836.
- [43] B.M. Dobratz, *LLNL Explosives Handbook*, University of California, Livermore, CA, USA, 1985.
- [44] V.A. Tartakovskiy, A.S. Ermakov, N.V. Sigai, O.N. Varfolomeeva, Synthesis of N,N'-dialkylmethylenebis(nitramines) from N-alkylsulfamates, *Russ. Chem. Bull.* 49 (2000) 1079–1081. <https://doi.org/10.1007/BF02494897>.
- [45] D. Spitzer, S. Braun, M.R. Schäfer, F. Ciszek, Comparative Crystallization Study of Several Linear Dinitramines in Nitrocellulose-Based Gels, *Propellants Explos. Pyrotech.* 28 (2003) 58–64. <https://doi.org/10.1002/prop.200390009>.
- [46] S. Zeman, Some predictions in the field of the physical thermal stability of nitramines, *Thermochim. Acta.* 302 (1997) 11–16. [https://doi.org/10.1016/S0040-6031\(96\)03101-2](https://doi.org/10.1016/S0040-6031(96)03101-2).
- [47] A. Stolovy, A.I. Namenson, J.B. Aviles, E.C. Jones, J.M. Kidd, Thermal initiation of high explosives by electron beam heating, *J. Energ. Mater.* 5 (1987) 181–238. <https://doi.org/10.1080/07370658708012352>.

- [48] S.K. Bhattacharia, B.L. Weeks, C.-C. Chen, Melting Behavior and Heat of Fusion of Compounds that Undergo Simultaneous Melting and Decomposition: An investigation with HMX, *J. Chem. Eng. Data.* 62 (2017) 967–972. <https://doi.org/10.1021/acs.jced.6b00769>.
- [49] R.A. Henry, W.P. Norris, 1,9-Diazido-2,4,6,8-tetranitro-2,4,6,8-tetrazanonane, US4362583A, 1982.
- [50] Yu.M. Burov, G.M. Nazin, G.B. Manelis, Retardation of monomolecular reactions in the solid phase, *Russ. Chem. Bull.* 48 (1999) 1250–1254. <https://doi.org/10.1007/BF02495284>.
- [51] J.C. Oxley, J.L. Smith, J.E. Brady, A.C. Brown, Characterization and Analysis of Tetranitrate Esters, *Propellants Explos. Pyrotech.* 37 (2012) 24–39. <https://doi.org/10.1002/prop.201100059>.
- [52] D.E. Chavez, M.A. Hiskey, D.L. Naud, D. Parrish, Synthesis of an Energetic Nitrate Ester, *Angew. Chem. Int. Ed.* 47 (2008) 8307–8309. <https://doi.org/10.1002/anie.200803648>.
- [53] K.C. Agrawal, K.B. Bears, R.K. Sehgal, J.N. Brown, P.E. Rist, W.D. Rupp, Potential radiosensitizing agents. Dinitroimidazoles, *J. Med. Chem.* 22 (1979) 583–586. <https://doi.org/10.1021/jm00191a025>.
- [54] L. Minier, R. Behrens, S. Bulusu, Solid-Phase Thermal Decomposition of 2,4-Dinitroimidazole (2,4-DNI), *MRS Proc.* 418 (1995) 111. <https://doi.org/10.1557/PROC-418-111>.
- [55] S.S. Novikov, L.I. Khmel'nitskii, O.V. Lebedev, V.V. Sevast'yanova, L.V. Epishina, Nitration of imidazoles with various nitrating agents, *Chem. Heterocycl. Compd.* 6 (1970) 465–469. <https://doi.org/10.1007/BF00478393>.
- [56] V.V. Dubikhin, G.M. Nazin, V.G. Prokudin, Z.G. Aliev, I.A. Vatsadze, S.A. Shevelev, I.L. Dalinger, Kinetics and mechanism of thermal decomposition of nitropyrazoles, *Russ. Chem. Bull.* 64 (2015) 127–131. <https://doi.org/10.1007/s11172-015-0830-9>.
- [57] J. Ritums, C. Oscarson, M. Liljedahl, P. Goede, K. Dudek, U. Heiche, Evaluation of 3(5),4-dinitropyrazole (DNP) as a New Melt Cast Matrix, in: *Proc. 45th Int. Conf. Fraunhofer ICT, Karlsruhe, 2014*: pp. 1–12.
- [58] M.V. Gorn, K.A. Monogarov, I.L. Dalinger, I.N. Melnikov, V.G. Kiselev, N.V. Muravyev, Pressure DSC for energetic materials. Part 2. Switching between evaporation and thermal decomposition of 3,5-dinitropyrazole, *Thermochim. Acta.* 690 (2020) 178697. <https://doi.org/10.1016/j.tca.2020.178697>.
- [59] S. Ek, N.V. Latypov, Four Syntheses of 4-Amino-3,5-dinitropyrazole: Four Syntheses of 4-Amino-3,5-dinitropyrazole, *J. Heterocycl. Chem.* 51 (2014) 1621–1627. <https://doi.org/10.1002/jhet.1725>.
- [60] X. Zhao, C. Qi, L. Zhang, Y. Wang, S. Li, F. Zhao, S. Pang, Amination of Nitroazoles — A Comparative Study of Structural and Energetic Properties, *Molecules.* 19 (2014) 896–910. <https://doi.org/10.3390/molecules19010896>.
- [61] P. Yin, J. Zhang, C. He, D.A. Parrish, J.M. Shreeve, Polynitro-substituted pyrazoles and triazoles as potential energetic materials and oxidizers, *J. Mater. Chem. A.* 2 (2014) 3200. <https://doi.org/10.1039/c3ta15057g>.
- [62] I.L. Dalinger, G.P. Popova, I.A. Vatsadze, T.K. Shkineva, S.A. Shevelev, Synthesis of 3,4,5-trinitropyrazole, *Russ. Chem. Bull.* 58 (2009) 2185–2185. <https://doi.org/10.1007/s11172-009-0301-2>.
- [63] G. Hervé, C. Roussel, H. Graindorge, Selective preparation of 3,4,5-trinitro-1H-pyrazole: a stable all-carbon-nitrated arene, *Angew. Chem. Int. Ed.* 49 (2010) 3177–3181. <https://doi.org/10.1002/anie.201000764>.

- [64] A. Bragin, A. Pivkina, N. Muravyev, K. Monogarov, O. Gryzlova, T. Shkineva, I. Dalinger, Thermal Decomposition of Nitropyrazoles, *Phys. Procedia*. 72 (2015) 358–361. <https://doi.org/10.1016/j.phpro.2015.09.110>.
- [65] P.J. Samuels, R. Damavarapu, H. Grau, K. Spangler, K. Caflin, E. Wrobel, Characterization of MTNP (1-methyl-3,4,5-trinitro-1,2-pyrazole), (2018). [https://ndiastorage.blob.core.usgovcloudapi.net/ndia/2018/imem/20074\\_Samuels\\_Presentation.pdf](https://ndiastorage.blob.core.usgovcloudapi.net/ndia/2018/imem/20074_Samuels_Presentation.pdf).
- [66] Y. Tang, D. Kumar, J.M. Shreeve, Balancing Excellent Performance and High Thermal Stability in a Dinitropyrazole Fused 1,2,3,4-Tetrazine, *J. Am. Chem. Soc.* 139 (2017) 13684–13687. <https://doi.org/10.1021/jacs.7b08789>.
- [67] A.I. Lesnikovich, O.A. Ivashkevich, S.V. Levchik, A.I. Balabanovich, P.N. Gaponik, A.A. Kulak, Thermal decomposition of aminotetrazoles, *Thermochim. Acta*. 388 (2002) 233–251. [https://doi.org/10.1016/S0040-6031\(02\)00027-8](https://doi.org/10.1016/S0040-6031(02)00027-8).
- [68] S.V. Levchik, O.A. Ivashkevich, A.I. Balabanovich, A.I. Lesnikovich, P.N. Gaponik, L. Costa, Thermal decomposition of aminotetrazoles: Part 1. 5-Aminotetrazole, *Thermochim. Acta*. 207 (1992) 115–130. [https://doi.org/10.1016/0040-6031\(92\)80129-K](https://doi.org/10.1016/0040-6031(92)80129-K).
- [69] M. Tremblay, SPECTRES INFRAROUGES DE COMPOSÉS RICHES EN AZOTE, *Can. J. Chem.* 43 (1965) 1154–1157. <https://doi.org/10.1139/v65-153>.
- [70] I.L. Dalinger, O.V. Serushkina, N.V. Muravyev, D.B. Meerov, E.A. Miroshnichenko, T.S. Kon'kova, K.Yu. Suponitsky, M.V. Vener, A.B. Sheremetev, Azasydnone – novel “green” building block for designing high energetic compounds, *J. Mater. Chem. A*. 6 (2018) 18669–18676. <https://doi.org/10.1039/C8TA06895J>.
- [71] T. Klapötke, P. Schmid, J. Stierstorfer, Crystal Structures of Furazanes, *Crystals*. 5 (2015) 418–432. <https://doi.org/10.3390/cryst5040418>.
- [72] A. Gunasekaran, J.H. Boyer, Dense energetic compounds of C, H, N, and O atoms. III. 5-[4-nitro-(1,2,5)oxadiazolyl]-5H-[1,2,3]triazolo[4,5-c][1,2,5]oxadiazole, *Heteroat. Chem.* 4 (1993) 521–524. <https://doi.org/10.1002/hc.520040519>.
- [73] Y. Tang, J. Zhang, L.A. Mitchell, D.A. Parrish, J.M. Shreeve, Taming of 3,4-Di(nitramino)furazan, *J. Am. Chem. Soc.* 137 (2015) 15984–15987. <https://doi.org/10.1021/jacs.5b09831>.
- [74] G.D. Solodyuk, M.D. Boldyrev, B.V. Gidasov, V.D. Nikolaev, ChemInform Abstract: OXIDATION OF 3,4-DIAMINOFURAZAN BY SOME PEROXIDE REAGENTS, *Chem. Informationsdienst*. 12 (1981). <https://doi.org/10.1002/chin.198136127>.
- [75] A.D. Nikolaeva, Yu.N. Matyushin, V.I. Pepekin, V.S. Smelov, V.V. Bulidorov, T.I. Bulidorova, A.Ya. Apin, Synthesis and study of detonation properties of 3-methyl-4-nitrofuroxan, *Bull. Acad. Sci. USSR Div. Chem. Sci.* 21 (1972) 927–928. <https://doi.org/10.1007/BF00854509>.
- [76] O.A. Rakitin, V.A. Ogurtsov, E.A. Khaibullina, T.I. Godovikova, L.I. Khmel'nitskii, Reaction of furoxanenitrolic acids with nitrogen tetroxide, *Chem. Heterocycl. Compd.* 29 (1993) 1099–1103. <https://doi.org/10.1007/BF00534399>.
- [77] A.S. Bailey, J.R. Case, 4:6-dinitrobenzofuroxan, nitrobenzodifuroxan and benzotrifuroxan: A new series of complex-forming reagents for aromatic hydrocarbons, *Tetrahedron*. 3 (1958) 113–131. [https://doi.org/10.1016/0040-4020\(58\)80003-4](https://doi.org/10.1016/0040-4020(58)80003-4).
- [78] D.L. Ornellas, The heat and products of detonation in a calorimeter of CNO, HNO, CHNF, CHNO, CHNOF, and CHNOSi explosives, *Combust. Flame*. 23 (1974) 37–46. [https://doi.org/10.1016/S0010-2180\(74\)80025-8](https://doi.org/10.1016/S0010-2180(74)80025-8).
- [79] Yu.N. Matyushin, V.I. Pepekin, V.P. Lebedev, V.V. Chironov, L.M. Kostikova, Y.O. Inozemtcev, T.S. Pivina, A.B. Sheremetev, Thermochemical properties and quantum-chemical parameters of benzotrifurazan and its N-oxides, in: *Proc. 30th Int. Annu. Conf. Fraunhofer ICT, Pfnztal: Fraunhofer ICT, 1999: p. 77.1-77.9*.



- [80] L.L. Fershtat, I.V. Ovchinnikov, M.A. Epishina, A.A. Romanova, D.B. Lempert, N.V. Muravyev, N.N. Makhova, Assembly of Nitrofurazan and Nitrofuoxan Frameworks for High-Performance Energetic Materials, *ChemPlusChem*. 82 (2017) 1315–1319. <https://doi.org/10.1002/cplu.201700340>.
- [81] A.A. Larin, A.V. Shaferov, M.A. Epishina, I.N. Melnikov, N.V. Muravyev, I.V. Ananyev, L.L. Fershtat, N.N. Makhova, Pushing the Energy-Sensitivity Balance with High-Performance Bifuroxans, *ACS Appl. Energy Mater.* 3 (2020) 7764–7771. <https://doi.org/10.1021/acsaem.0c01162>.
- [82] ASTM E928-03, Standard Test Method for Purity by Differential Scanning Calorimetry, ASTM International, West Conshohocken, PA, 2005. 10.1520/E0928-08R14.
- [83] S. Löbbecke, M.A. Bohn, A. Pfeil, H.H. Krause, Thermal behavior and stability of HNIW (CL-20), in: *Proc. 29th Int. Annu. Conf. Fraunhofer ICT*, Pfnzthal: Fraunhofer ICT, 1998: p. 145.1-145.15.
- [84] R. Turcotte, M. Vachon, Q.S.M. Kwok, R. Wang, D.E.G. Jones, Thermal study of HNIW (CL-20), *Thermochim. Acta.* 433 (2005) 105–115. <https://doi.org/10.1016/j.tca.2005.02.021>.
- [85] A.K. Burnham, R.K. Weese, R. Wang, Q.S.M. Kwok, D.E.G. Jones, Solid-Solid Phase Transition Kinetics of FOX-7, in: *Proc. 2005 NATAS Annu. Conf.*, 2005: pp. 1–8.
- [86] J.S. Chickos, S. Hosseini, D.G. Hesse, J.F. Liebman, Heat capacity corrections to a standard state: a comparison of new and some literature methods for organic liquids and solids, *Struct. Chem.* 4 (1993) 271–278. <https://doi.org/10.1007/BF00673701>.
- [87] J.S. Chickos, A. Gavezzotti, Sublimation Enthalpies of Organic Compounds: A Very Large Database with a Match to Crystal Structure Determinations and a Comparison with Lattice Energies, *Cryst. Growth Des.* 19 (2019) 6566–6576. <https://doi.org/10.1021/acs.cgd.9b01006>.
- [88] N.V. Sidgwick, *Some Physical Properties of The Covalent Link in Chemistry*, Cornell University Press, London, 1933.
- [89] R.M. Stephenson, S. Malanowski, *Handbook of the Thermodynamics of Organic Compounds*, Springer Netherlands, Dordrecht, 1987. <http://link.springer.com/10.1007/978-94-009-3173-2> (accessed May 5, 2016).
- [90] D.R. Stull, Vapor Pressure of Pure Substances. *Organic and Inorganic Compounds*, *Ind. Eng. Chem.* 39 (1947) 517–540. <https://doi.org/10.1021/ie50448a022>.
- [91] I. Wadsö, G.L. Borgen, G.O. Sørensen, G. Olsen, G. Jansen, Thermochemical Properties of Diacetamide, N-Butyldiacetamide and N-Phenyldiacetamide., *Acta Chem. Scand.* 19 (1965) 1079–1087. <https://doi.org/10.3891/acta.chem.scand.19-1079>.
- [92] V.N. Emel'yanenko, G.J. Kabo, S.P. Verevkin, Measurement and Prediction of Thermochemical Properties: Improved Increments for the Estimation of Enthalpies of Sublimation and Standard Enthalpies of Formation of Alkyl Derivatives of Urea, *J. Chem. Eng. Data.* 51 (2006) 79–87. <https://doi.org/10.1021/je050230z>.
- [93] D. Zaitsau, G.J. Kabo, A.A. Kozyro, V.M. Sevruk, The effect of the failure of isotropy of a gas in an effusion cell on the vapor pressure and enthalpy of sublimation for alkyl derivatives of carbamide, *Thermochim. Acta.* 406 (2003) 17–28. [https://doi.org/10.1016/S0040-6031\(03\)00231-4](https://doi.org/10.1016/S0040-6031(03)00231-4).
- [94] H.G.M. De Wit, J.C. Van Miltenburg, C.G. De Kruif, Thermodynamic properties of molecular organic crystals containing nitrogen, oxygen, and sulphur 1. Vapour pressures and enthalpies of sublimation, *J. Chem. Thermodyn.* 15 (1983) 651–663. [https://doi.org/10.1016/0021-9614\(83\)90079-4](https://doi.org/10.1016/0021-9614(83)90079-4).

- [95] D. Ferro, G. Barone, G. Della Gatta, V. Piacente, Vapour pressures and sublimation enthalpies of urea and some of its derivatives, *J. Chem. Thermodyn.* 19 (1987) 915–923. [https://doi.org/10.1016/0021-9614\(87\)90038-3](https://doi.org/10.1016/0021-9614(87)90038-3).
- [96] K. Suzuki, S. Onishi, T. Koide, S. Seki, Vapor Pressures of Molecular Crystals. XI. Vapor Pressures of Crystalline Urea and Diformylhydrazine. Energies of Hydrogen Bonds in these Crystals, *Bull. Chem. Soc. Jpn.* 29 (1956) 127–131. <https://doi.org/10.1246/bcsj.29.127>.
- [97] H.J. Svec, D.D. Clyde, Vapor Pressures of Some  $\alpha$ -Amino Acids., *J. Chem. Eng. Data.* 10 (1965) 151–152. <https://doi.org/10.1021/je60025a024>.
- [98] N. Matsubara, T. Kuwamoto, Vapor pressure measurements in carrier gas containing ligand vapor using the transpiration technique, *Thermochim. Acta.* 83 (1985) 193–202. [https://doi.org/10.1016/0040-6031\(85\)87003-9](https://doi.org/10.1016/0040-6031(85)87003-9).
- [99] R. Pena, J.P. Ribet, J.L. Maurel, L. Valat, F. Lacoulonche, A. Chauvet, Sublimation and vaporisation processes of S(-) efroxan hydrochloride, *Thermochim. Acta.* 408 (2003) 85–96. [https://doi.org/10.1016/S0040-6031\(03\)00321-6](https://doi.org/10.1016/S0040-6031(03)00321-6).
- [100] S. Klosky, L.P.L. Woo, R.J. Flanigan, THE VAPOR-PRESSURE CURVE OF BENZOIC ACID, *J. Am. Chem. Soc.* 49 (1927) 1280–1284. <https://doi.org/10.1021/ja01404a017>.
- [101] J.S. Chickos, S. Hosseini, D.G. Hesse, Determination of vaporization enthalpies of simple organic molecules by correlations of changes in gas chromatographic net retention times, *Thermochim. Acta.* 249 (1995) 41–62. [https://doi.org/10.1016/0040-6031\(95\)90670-3](https://doi.org/10.1016/0040-6031(95)90670-3).
- [102] J.S. Chickos, W.E. Acree Jr., Enthalpies of Sublimation of Organic and Organometallic Compounds. 1910–2001, *J. Phys. Chem. Ref. Data.* 31 (2002) 537–698. <https://doi.org/10.1063/1.1475333>.
- [103] Yu.A. Lebedev, E.A. Miroshnichenko, *Thermochemistry of vapor formation of organic compounds*, Nauka, Moscow, 1981.
- [104] E. Kaisersberger, W. Hädrich, W.-D. Emmerich, Measurement of low vapour pressures according to the Knudsen effusion method, *Thermochim. Acta.* 95 (1985) 331–336. [https://doi.org/10.1016/0040-6031\(85\)85294-1](https://doi.org/10.1016/0040-6031(85)85294-1).
- [105] R.D. Chirico, S.E. Knipmeyer, A. Nguyen, W.V. Steele, The thermodynamic properties to the temperature 700 K of naphthalene and of 2,7-dimethylnaphthalene, *J. Chem. Thermodyn.* 25 (1993) 1461–1494. <https://doi.org/10.1006/jcht.1993.1148>.
- [106] C.G. de Kruif, T. Kuipers, J.C. van Miltenburg, R.C.F. Schaake, G. Stevens, The vapour pressure of solid and liquid naphthalene, *J. Chem. Thermodyn.* 13 (1981) 1081–1086. [https://doi.org/10.1016/0021-9614\(81\)90006-9](https://doi.org/10.1016/0021-9614(81)90006-9).
- [107] A.B. Bazyleva, A.V. Blokhin, G.J. Kabo, M.B. Charapennikau, V.N. Emel'yanenko, S.P. Verevkin, V. Diky, Thermodynamic Properties of Adamantane Revisited, *J. Phys. Chem. B.* 115 (2011) 10064–10072. <https://doi.org/10.1021/jp204792b>.
- [108] Y.D. Lei, R. Chankalal, A. Chan, F. Wania, Supercooled Liquid Vapor Pressures of the Polycyclic Aromatic Hydrocarbons, *J. Chem. Eng. Data.* 47 (2002) 801–806. <https://doi.org/10.1021/je0155148>.
- [109] D.A. Hinckley, T.F. Bidleman, W.T. Foreman, J.R. Tuschall, Determination of vapor pressures for nonpolar and semipolar organic compounds from gas chromatographic retention data, *J. Chem. Eng. Data.* 35 (1990) 232–237. <https://doi.org/10.1021/je00061a003>.
- [110] V.N. Emel'yanenko, D.H. Zaitsau, S.P. Verevkin, Thermochemical Properties of Xanthine and Hypoxanthine Revisited, *J. Chem. Eng. Data.* 62 (2017) 2606–2609. <https://doi.org/10.1021/acs.jced.7b00085>.
- [111] A.B. Teplitskii, I.K. Yanson, Effect of substituents on the heat of sublimation of nucleic acid nitrogenous bases, *Biofizika.* 20 (1975) 189–193.
- [112] U.J. Griesser, M. Szelagiewicz, U.Ch. Hofmeier, C. Pitt, S. Cianferani, Vapor Pressure and Heat of Sublimation of Crystal Polymorphs, *J. Therm. Anal. Calorim.* 57 (1999) 45–60. <https://doi.org/10.1023/A:1010188923713>.

- [113] A. Abdelaziz, D.H. Zaitsau, A. Buzyurov, A.A. Minakov, S.P. Verevkin, C. Schick, Fast scanning calorimetry: Sublimation thermodynamics of low volatile and thermally unstable compounds, *Thermochim. Acta.* 676 (2019) 249–262. <https://doi.org/10.1016/j.tca.2019.05.008>.
- [114] E.F.C. Byrd, B.M. Rice, Improved Prediction of Heats of Formation of Energetic Materials Using Quantum Mechanical Calculations, *J. Phys. Chem. A.* 110 (2006) 1005–1013. <https://doi.org/10.1021/jp0536192>.
- [115] H. Östmark, S. Wallin, H.G. Ang, Vapor Pressure of Explosives: A Critical Review, *Propellants Explos. Pyrotech.* 37 (2012) 12–23. <https://doi.org/10.1002/prop.201100083>.
- [116] P.A. Pella, Generator for producing trace vapor concentrations of 2,4,6-trinitrotoluene, 2,4-dinitrotoluene, and ethylene glycol dinitrate for calibrating explosives vapor detectors, *Anal. Chem.* 48 (1976) 1632–1637. <https://doi.org/10.1021/ac50005a054>.
- [117] A. Freedman, P.L. Kebabian, Z. Li, W.A. Robinson, J.C. Wormhoudt, Apparatus for determination of vapor pressures at ambient temperatures employing a Knudsen effusion cell and quartz crystal microbalance, *Meas. Sci. Technol.* 19 (2008) 125102. <https://doi.org/10.1088/0957-0233/19/12/125102>.
- [118] L. Rittfeldt, Determination of Vapor Pressure of Low-Volatility Compounds Using a Method To Obtain Saturated Vapor with Coated Capillary Columns, *Anal. Chem.* 73 (2001) 2405–2411. <https://doi.org/10.1021/ac010015v>.
- [119] D.S. Viswanath, T.K. Ghosh, V.M. Boddu, *Emerging Energetic Materials: Synthesis, Physicochemical, and Detonation Properties*, Springer Netherlands, Dordrecht, 2018. <https://doi.org/10.1007/978-94-024-1201-7>.
- [120] R.B. Cundall, T. Frank Palmer, C.E.C. Wood, Vapour pressure measurements on some organic high explosives, *J. Chem. Soc. Faraday Trans. 1 Phys. Chem. Condens. Phases.* 74 (1978) 1339. <https://doi.org/10.1039/f19787401339>.
- [121] Hwang D, Yoshizawa, F, Tamura, M., T. Yoshida, Determination of the enthalpies of phase change for some of energetic materials by using the DSC method under reduced pressure, *Anzen Kogaku (Journal of Japan Society for Safety Engineering)*. 29 (1990) 168–174.
- [122] V.P. Sinditskii, A.I. Levshenkov, V.Yu. Egorshv, V.V. Serushkin, Study on Combustion and Thermal Decomposition of 1,1-Diamino-2,2-dinitroethylene (FOX-7), in: *Proc. 30th Int. Pyrotech. Semin., IPSUSA Seminars, 2003*: pp. 299–311.
- [123] A.A. Kushtaev, D.Y. Nekrasov, N.N. Kondakova, Sintez i nekotorye svoystva dejterirovannogo 1,1-diamino-2,2-dinitrojetilena, in: *Usp. V Spec. Him. Him. Tehnol., Moscow, 2015*: pp. 142–147.
- [124] N.N. Volkova, A.V. Shastin, Z.G. Aliev, V.G. Prokudin, Osobennosti sublimacii 1,1-diamino-2,2-dinitrojetilena i ego proizvodnyh, in: *Usp. V Spec. Him. Him. Tehnol., Moscow, 2015*: pp. 142–147.
- [125] L.M.G. Minier, R. Behrens, Thermal decomposition mechanisms of bis(2-fluoro-2,2-dinitroethyl) formal (FEFO) and bis(2-fluoro-2,2-dinitroethyl) difluoroformal (DFF) from simultaneous thermogravimetric modulated beam mass spectrometry (STMBMS) measurements, *Propellants Explos. Pyrotech.* 22 (1997) 23–33. <https://doi.org/10.1002/prop.19970220107>.
- [126] A.M. Astakhov, K.P. Dyugaev, A.A. Kuzubov, V.A. Nasluzov, A.D. Vasiliev, É.S. Buka, Theoretical studies of the structure of nitrimines. I. Structure of 2-nitroguanidine and its alkyl derivatives, *J. Struct. Chem.* 50 (2009) 201–211. <https://doi.org/10.1007/s10947-009-0030-2>.
- [127] E.A. Miroshnichenko, T.S. Kon'kova, Yu.N. Matyushin, Ya.O. Inozemtsev, Bond dissociation energies in nitramines, *Russ. Chem. Bull.* 58 (2009) 2015–2019. <https://doi.org/10.1007/s11172-009-0275-0>.

- [128] V.I. Pepekin, Yu.N. Matyushin, Yu.A. Lebedev, Thermochemistry of N-nitro- and N-nitrosoamines of the alicyclic series, *Bull. Acad. Sci. USSR Div. Chem. Sci.* 23 (1974) 1707–1710. <https://doi.org/10.1007/BF00923193>.
- [129] V.P. Sinditskii, V.Yu. Egorshchikov, V.V. Serushkin, A.I. Levshenkov, M.V. Berezin, S.A. Filatov, S.P. Smirnov, Evaluation of decomposition kinetics of energetic materials in the combustion wave, *Thermochim. Acta.* 496 (2009) 1–12. <https://doi.org/10.1016/j.tca.2009.07.004>.
- [130] J.W. Taylor, R.J. Crookes, Vapour pressure and enthalpy of sublimation of 1,3,5,7-tetranitro-1,3,5,7-tetra-azacyclo-octane (HMX), *J. Chem. Soc. Faraday Trans. 1 Phys. Chem. Condens. Phases.* 72 (1976) 723. <https://doi.org/10.1039/f19767200723>.
- [131] J. Yang, G. Wang, X. Gong, X. Wei, Comparing the performance of aliphatic azido nitramines, nitrate esters, and nitro compounds: theoretical design and investigation, *Can. J. Chem.* 93 (2015) 1232–1238. <https://doi.org/10.1139/cjc-2015-0266>.
- [132] K. Gańczyk, A. Zygmunt, T. Gołofit, Thermal properties of TEX decomposition or sublimation, *J. Therm. Anal. Calorim.* 125 (2016) 967–975. <https://doi.org/10.1007/s10973-016-5476-9>.
- [133] O.V. Dorofeeva, M.A. Suntsova, Enthalpy of formation of CL-20, *Comput. Theor. Chem.* 1057 (2015) 54–59. <https://doi.org/10.1016/j.comptc.2015.01.015>.
- [134] L.M. Kostikova, E.A. Miroshnichenko, Y.O. Inozemtcev, Yu.N. Matyushin, Efficient Energies of Interaction of Functional Groups and Energies of Dissociation Bonds in Alkyl nitrates, in: *Proc. 32th Int. Annu. Conf. ICT, Karlsruhe, Germany, 2001*: p. 104.1-104.9.
- [135] M.A. Suntsova, (PhD Thesis) Prediction of enthalpy of formation of novel nitrogen-based high-energy substances using the quantum chemical computations, Lomonosov Moscow State University, 2016. <http://www.chem.msu.ru/rus/theses/2016/2016-10-10-suntsova/fulltext.pdf>.
- [136] E.A. Miroshnichenko, V.P. Lebedev, L.M. Kostikova, V.P. Vorob'eva, A.B. Vorob'ev, Y.O. Inozemtcev, Enthalpy characteristics of nitro- and fluorine-nitro derivatives heterocyclic compounds, in: *Proc. 34th Int. Annu. Conf. Fraunhofer ICT, Pfinztal: Fraunhofer ICT, 2003*: pp. 1–7.
- [137] D. Price, GrIMEx: Development of a Novel, Green IM Comp B Replacement, (2016). <https://ndiastorage.blob.core.usgovcloudapi.net/ndia/2016/IMEM/18770price.pdf>.
- [138] M.R. Manaa, I.-F.W. Kuo, L.E. Fried, First-principles high-pressure unreacted equation of state and heat of formation of crystal 2,6-diamino-3,5-dinitropyrazine-1-oxide (LLM-105), *J. Chem. Phys.* 141 (2014) 064702. <https://doi.org/10.1063/1.4891933>.
- [139] N. Cheng, Q. Gan, Q. Yu, X. Zhang, R. Li, S. Qian, C. Feng, Initial Mechanisms for the Unimolecular Thermal Decomposition of 2,6-Diamino-3,5-dinitropyrazine-1-oxide, *Molecules.* 24 (2018) 125. <https://doi.org/10.3390/molecules24010125>.
- [140] A.A. Kozyro, V.V. Simirskii, A.P. Krasulin, V.M. Sevruk, G.Y. Kabo, M.L. Frenkel, P.N. Gaponik, Y.V. Grigor'ev, Thermodynamic properties of tetrazole derivatives in different aggregation states, *Zh Fiz Khim.* 64 (1990) 656–661.
- [141] M.A. Suntsova, O.V. Dorofeeva, Prediction of enthalpies of sublimation of high-nitrogen energetic compounds: Modified Politzer model, *J. Mol. Graph. Model.* 72 (2017) 220–228. <https://doi.org/10.1016/j.jmkgm.2017.01.013>.
- [142] V.P. Sinditskii, M.C. Vu, A.B. Sheremetev, N.S. Alexandrova, Study on thermal decomposition and combustion of insensitive explosive 3,3'-diamino-4,4'-azofurazan (DAAzF), *Thermochim. Acta.* 473 (2008) 25–31. <https://doi.org/10.1016/j.tca.2008.04.004>.
- [143] V.P. Sinditskii, M.C. Vu, V. Shelaputina, A.B. Sheremetev, N.S. Alexandrova, Study on thermal decomposition and combustion of insensitive explosives 3,3'-diamino-4,4'-azofurazan (DAAzF) and 3,3'-diamino-4,4'-azoxyfurazan (DAAF), in: *Theory Pract. Energ. Mater. Proc 7th Int Autumn Sem Propellants Explos. Pyrotech., Science Press, Beijing, Xi'an, China, 2007*: pp. 422–428.

- [144] D.S. Barnes, G. Pilcher, Enthalpies of combustion of ethanamide, propanamide, and butanamide, *J. Chem. Thermodyn.* 7 (1975) 377–382. [https://doi.org/10.1016/0021-9614\(75\)90176-7](https://doi.org/10.1016/0021-9614(75)90176-7).
- [145] B. Chan, L. Radom, W2X and W3X-L: Cost-Effective Approximations to W2 and W4 with  $\text{kJ mol}^{-1}$  Accuracy, *J. Chem. Theory Comput.* 11 (2015) 2109–2119. <https://doi.org/10.1021/acs.jctc.5b00135>.
- [146] B. Narayanan, P.C. Redfern, R.S. Assary, L.A. Curtiss, Accurate quantum chemical energies for 133 000 organic molecules, *Chem. Sci.* 10 (2019) 7449–7455. <https://doi.org/10.1039/C9SC02834J>.
- [147] O.V. Dorofeeva, O.N. Ryzhova, Gas-Phase Enthalpies of Formation and Enthalpies of Sublimation of Amino Acids Based on Isodesmic Reaction Calculations, *J. Phys. Chem. A.* 118 (2014) 3490–3502. <https://doi.org/10.1021/jp501357y>.
- [148] J.P. Guthrie, P.A. Cullimore, Effect of the acyl substituent on the equilibrium constant for hydration of esters, *Can. J. Chem.* 58 (1980) 1281–1294. <https://doi.org/10.1139/v80-201>.
- [149] M.V. Roux, M. Temprado, J.S. Chickos, Y. Nagano, Critically Evaluated Thermochemical Properties of Polycyclic Aromatic Hydrocarbons, *J. Phys. Chem. Ref. Data.* 37 (2008) 1855–1996. <https://doi.org/10.1063/1.2955570>.
- [150] A. Karton, J.M.L. Martin, Explicitly correlated  $W_n$  theory: W1-F12 and W2-F12, *J. Chem. Phys.* 136 (2012) 124114. <https://doi.org/10.1063/1.3697678>.
- [151] N.T. Cuong, T.B. Tai, V.T.T. Ha, M.T. Nguyen, Thermochemical parameters of caffeine, theophylline, and xanthine, *J. Chem. Thermodyn.* 42 (2010) 437–440. <https://doi.org/10.1016/j.jct.2009.10.006>.
- [152] M.A. Suntsova, O.V. Dorofeeva, Use of G4 Theory for the Assessment of Inaccuracies in Experimental Enthalpies of Formation of Aromatic Nitro Compounds, *J. Chem. Eng. Data.* 61 (2016) 313–329. <https://doi.org/10.1021/acs.jced.5b00558>.
- [153] X. Zhang, X. Gong, A computational study on new oxidizers as replacements for ammonium perchlorate: tetranitroacetimidic acid and tetranitroacetamide, *Can. J. Chem.* 95 (2017) 199–206. <https://doi.org/10.1139/cjc-2016-0468>.
- [154] M.A. Suntsova, O.V. Dorofeeva, Use of G4 Theory for the Assessment of Inaccuracies in Experimental Enthalpies of Formation of Aliphatic Nitro Compounds and Nitramines, *J. Chem. Eng. Data.* 59 (2014) 2813–2826. <https://doi.org/10.1021/je500440y>.
- [155] M.A. Suntsova, O.V. Dorofeeva, Comment on “Use of G4 Theory for the Assessment of Inaccuracies in Experimental Enthalpies of Formation of Aliphatic Nitro Compounds and Nitramines,” *J. Chem. Eng. Data.* 60 (2015) 1532–1533. <https://doi.org/10.1021/acs.jced.5b00159>.
- [156] A. Osmont, L. Catoire, I. Gökalp, V. Yang, Ab initio quantum chemical predictions of enthalpies of formation, heat capacities, and entropies of gas-phase energetic compounds, *Combust. Flame.* 151 (2007) 262–273. <https://doi.org/10.1016/j.combustflame.2007.05.001>.
- [157] V.G. Kiselev, C.F. Goldsmith, Accurate Prediction of Bond Dissociation Energies and Barrier Heights for High-Energy Caged Nitro and Nitroamino Compounds Using a Coupled Cluster Theory, *J. Phys. Chem. A.* 123 (2019) 4883–4890. <https://doi.org/10.1021/acs.jpca.9b01506>.
- [158] X.L. Zeng, X.H. Ju, H.X. Gao, Theoretical Study of 4,10-Dinitro-2,6,8,12-tetraoxa-4,10-diaza-tetracyclododecane (TEX), *Adv. Mater. Res.* 554–556 (2012) 1618–1623. <https://doi.org/10.4028/www.scientific.net/AMR.554-556.1618>.
- [159] V.D. Ghule, P.M. Jadhav, R.S. Patil, S. Radhakrishnan, T. Soman, Quantum-Chemical Studies on Hexaazaisowurtzitanes, *J. Phys. Chem. A.* 114 (2010) 498–503. <https://doi.org/10.1021/jp9071839>.

- [160] T.M. Klapötke, B. Krumm, F.X. Steemann, K.-D. Umland, Bis(1,3-dinitratoprop-2-yl) Nitramine, a New Sensitive Explosive Combining a Nitrate Ester with a Nitramine, *Z. Für Anorg. Allg. Chem.* 636 (2010) 2343–2346. <https://doi.org/10.1002/zaac.201000229>.
- [161] M.A.M. Rashid, S.G. Cho, T.H. Choi, C.H. Choi, Heat of formation predictions of various nitro-substituted azoles by G4MP2-SFM scheme, *Theor. Chem. Acc.* 134 (2015) 126. <https://doi.org/10.1007/s00214-015-1733-4>.
- [162] Z. Yu, E.R. Bernstein, Sensitivity and Performance of Azole-Based Energetic Materials, *J. Phys. Chem. A.* 117 (2013) 10889–10902. <https://doi.org/10.1021/jp4054007>.
- [163] S. Comte, G. Daquin, Synthesis of Di- and Trinitropyrazoles, in: *Proc. 43rd Int. Annu. Conf. Fraunhofer ICT*, Pfinztal: Fraunhofer ICT, 2012: p. 5.1-5.7.
- [164] E. Gökçınar, T.M. Klapötke, A.J. Bellamy, Computational study on 2,6-diamino-3,5-dinitropyrazine and its 1-oxide and 1,4-dioxide derivatives, *J. Mol. Struct. THEOCHEM.* 953 (2010) 18–23. <https://doi.org/10.1016/j.theochem.2010.04.015>.
- [165] V.G. Kiselev, P.B. Cheblakov, N.P. Gritsan, Tautomerism and Thermal Decomposition of Tetrazole: High-Level ab Initio Study, *J. Phys. Chem. A.* 115 (2011) 1743–1753. <https://doi.org/10.1021/jp112374t>.
- [166] N. Fischer, T.M. Klapötke, M. Reymann, J. Stierstorfer, Nitrogen-Rich Salts of 1*H*,1'*H*-5,5'-Bitetrazole-1,1'-diol: Energetic Materials with High Thermal Stability, *Eur. J. Inorg. Chem.* 2013 (2013) 2167–2180. <https://doi.org/10.1002/ejic.201201192>.
- [167] J. Zhang, J.M. Shreeve, 3,3'-Dinitroamino-4,4'-azoxyfurazan and Its Derivatives: An Assembly of Diverse N–O Building Blocks for High-Performance Energetic Materials, *J. Am. Chem. Soc.* 136 (2014) 4437–4445. <https://doi.org/10.1021/ja501176q>.
- [168] P. Gao, Structures and properties of the isomers of hexanitrosobenzene: A DFT study, *J. Mol. Struct. THEOCHEM.* 767 (2006) 119–130. <https://doi.org/10.1016/j.theochem.2006.05.007>.
- [169] D. Fischer, T.M. Klapötke, J. Stierstorfer, Synthesis and Characterization of Diaminobisfuroxane: Synthesis and Characterization of Diaminobisfuroxane, *Eur. J. Inorg. Chem.* 2014 (2014) 5808–5811. <https://doi.org/10.1002/ejic.201402960>.
